# Supplementary material for: Synthesis and evaluation of imidazole-4,5- and pyrazine-2,3-dicarboxamides targeting dengue and yellow fever virus
Source: PubMed Central journal article supplement (PMC4237513; doi:10.1016/j.ejmech.2014.09.062), 2014-11-24

## Supporting Information

### **Synthesis and evaluation of imidazole-4,5- and pyrazine-2,3-dicarboxamides targeting Dengue and Yellow fever virus**

Milind Saudi<sup>a</sup>, Joanna Zmurko<sup>b</sup>, Suzanne Kaptein<sup>b</sup>, Jef Rozenski<sup>a</sup>, Johan Neyts<sup>b</sup>,  
Arthur Van Aerschot<sup>a\*</sup>

<sup>a</sup>Medicinal Chemistry and <sup>b</sup>Virology and Chemotherapy, Rega Institute for Medical  
Research, KU Leuven, Minderbroedersstraat 10, BE-3000 Leuven, Belgium

### **List of contents**

|                                                            |        |
|------------------------------------------------------------|--------|
| General Information.....                                   | S2     |
| HRMS, <sup>1</sup> H and <sup>13</sup> C NMR spectra ..... | S3-S70 |

## General Information

Reagents and solvents were purchased from commercial suppliers (Acros, Sigma-Aldrich, Bachem, Novabiochem) and used as provided, unless indicated otherwise. All the solvents were of analytical grade and were stored over 4Å molecular sieves. Reactions were carried out in oven-dried glassware under a nitrogen atmosphere with stirring at 85°C.

<sup>1</sup>H and <sup>13</sup>C NMR spectra of the compounds dissolved in CDCl<sub>3</sub>, MeOD or DMSO-d<sub>6</sub> were recorded on a Bruker UltraShield Avance 300 MHz or 500 MHz spectrometer. The chemical shifts are expressed as δ values in parts per million (ppm), using the residual solvent peaks (CDCl<sub>3</sub>: <sup>1</sup>H, 7.26 ppm; <sup>13</sup>C, 77.00 ppm; MeOD: <sup>1</sup>H, 3.31 ppm; <sup>13</sup>C, 49.00 ppm) as a reference. Coupling constants are given in Hertz (Hz). The peak patterns are indicated by the following abbreviations: bs = broad singlet, d = doublet, m = multiplet, q = quadruplet, s = singlet and t = triplet. High resolution mass spectra were recorded on a quadrupole time-of-flight mass spectrometer (Q-Tof-2, Micromass, Manchester, UK) equipped with a standard ESI interface; samples were infused in 2-propanol/H<sub>2</sub>O (1:1) at 3 μL.min<sup>-1</sup>.

For TLC, precoated aluminium sheets were used (Merck, Silica gel 60 F<sub>254</sub>). The spots were visualized by UV light at 254 nm. Column chromatography was performed on ICN silica gel 60A° 40-60 μM.

This supporting information provides the <sup>1</sup>H and <sup>13</sup>C NMR and HRMS spectra for all new final compounds with numbering according to the manuscript.

# HRMS, <sup>1</sup>H and <sup>13</sup>C NMR Spectra

## 5,10-dioxo-N<sup>1</sup>,N<sup>6</sup>-diphenyl-5,10-dihydroimidazo[1,5-*a*:1',5'-*d*]pyrazine-1,6-dicarboxamide (12a)

HRMS (ES+)

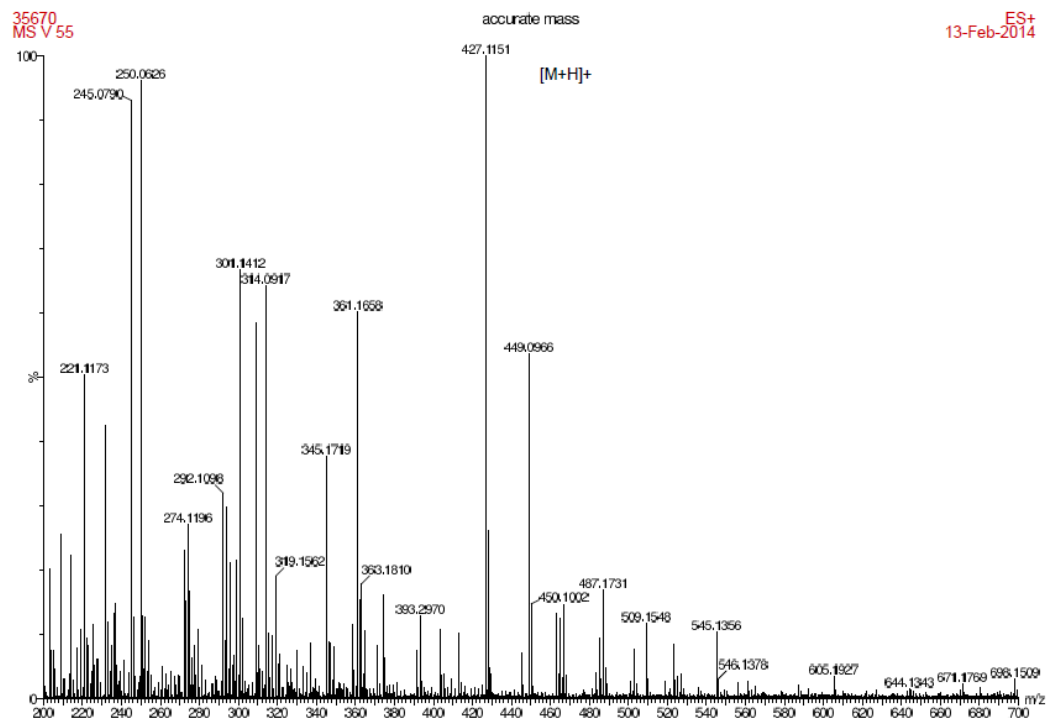

<sup>1</sup>H NMR (300 MHz, DMSO)

MS-IV-55 in DMSO  
11/02/2014

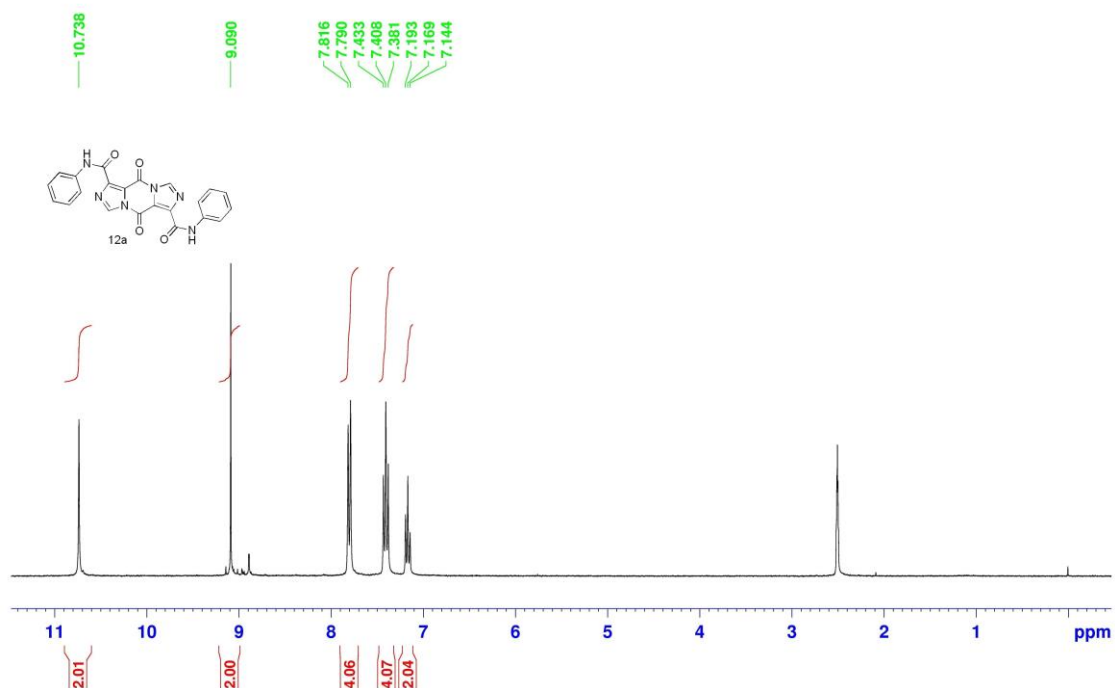

<sup>13</sup>C NMR (75 MHz, DMSO)

MS-IV-55 C13 in DMSO  
11/02/2014

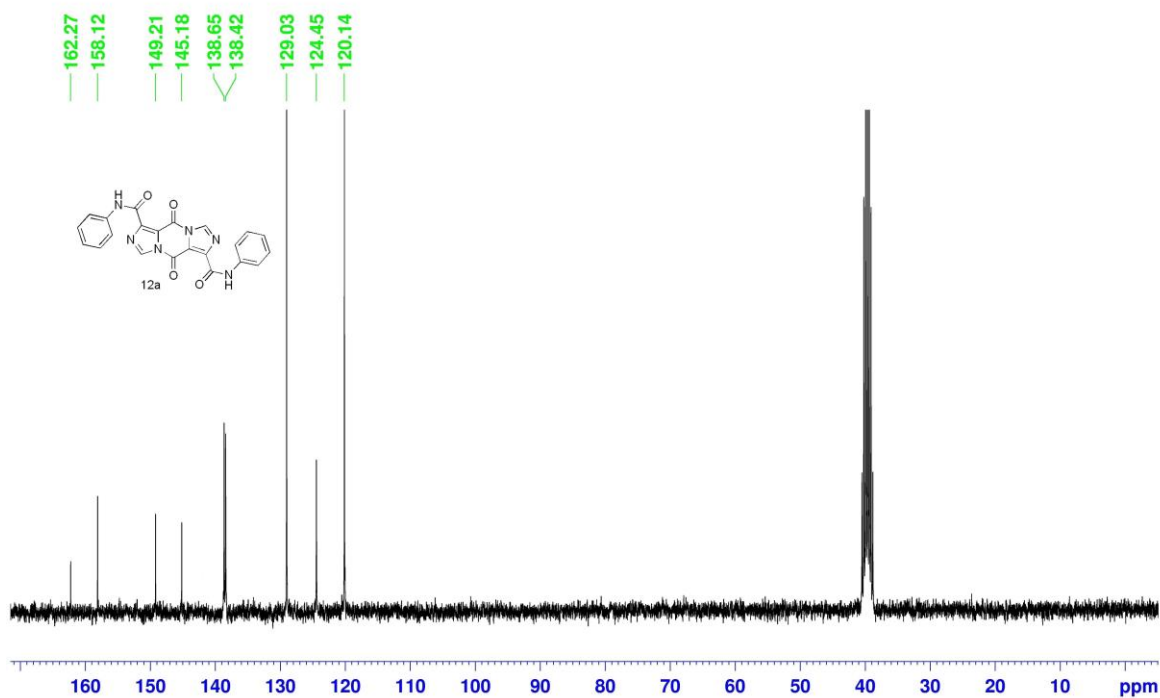

***N*<sup>1</sup>,*N*<sup>6</sup>-bis(4-fluorophenyl)-5,10-dioxo-5,10-dihydroimidazo[1,5-*a*:1',5'-*d*]pyrazine-1,6-dicarboxamide (12b)**

HRMS (ES+)

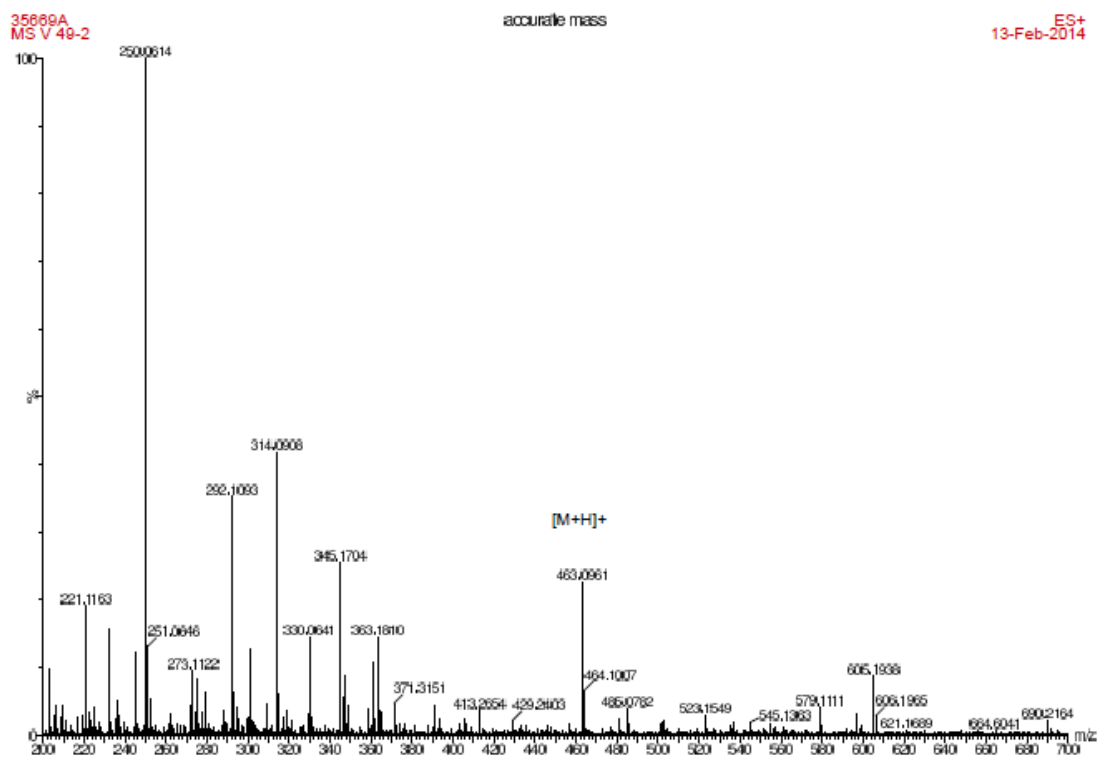

# <sup>1</sup>H NMR (300 MHz, DMSO)

MS-V-49-2 in DMSO  
12/02/2014

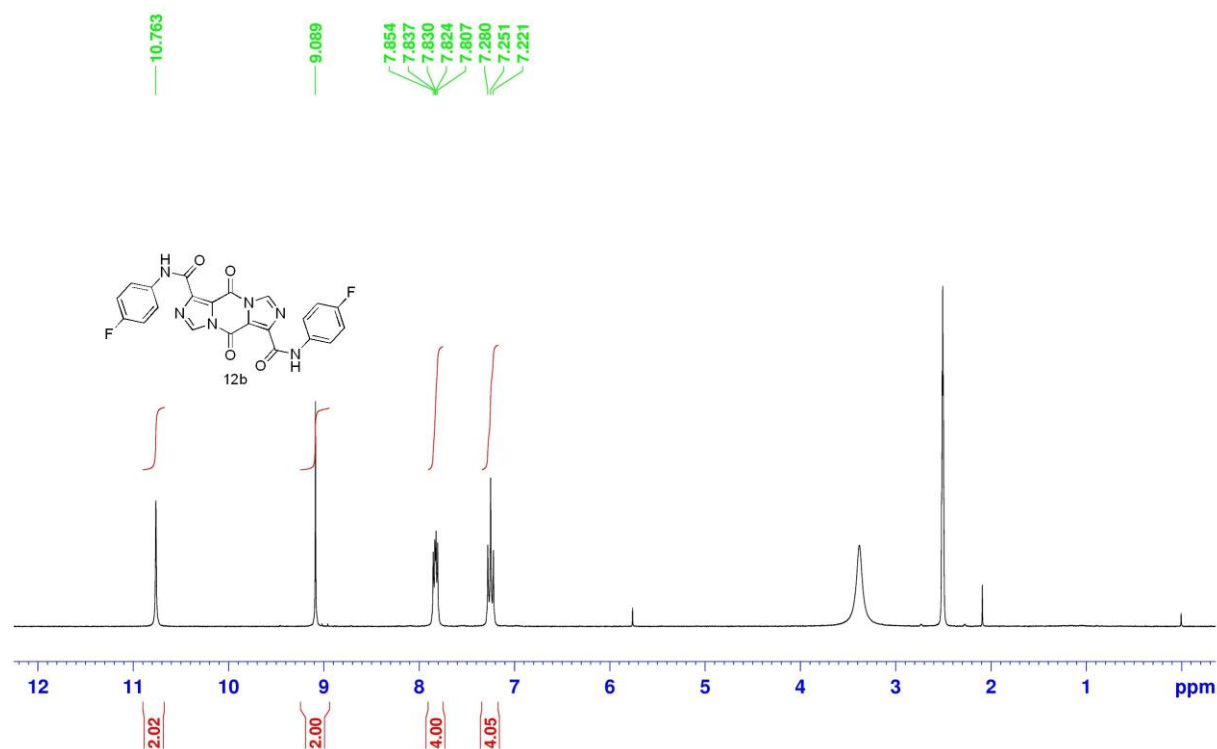

# <sup>13</sup>C NMR (75 MHz, DMSO)

MS-V-49-2 C13 in DMSO  
12/02/2014

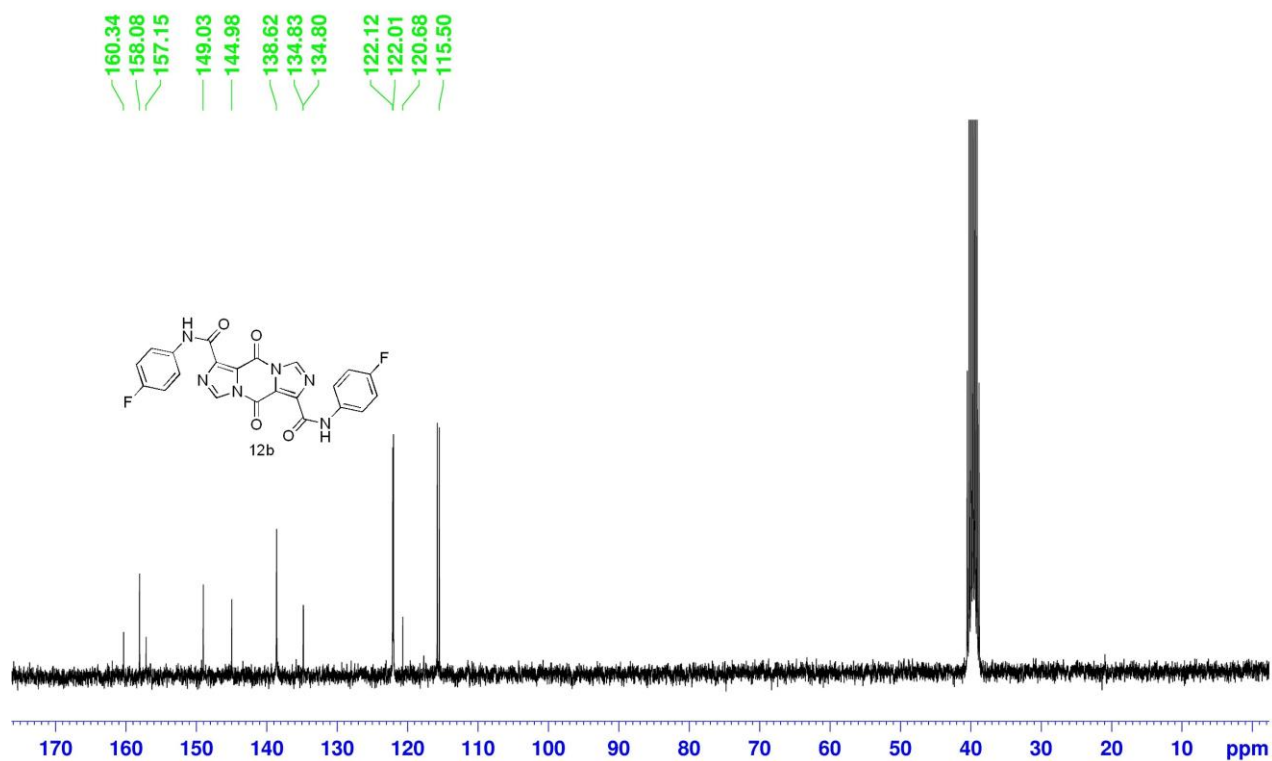

**5,10-dioxo-*N*<sup>1</sup>,*N*<sup>6</sup>-di-*p*-tolyl-5,10-dihydroimidazo[1,5-*a*:1',5'-*d*]pyrazine-1,6-dicarboxamide (12c)**

HRMS (ES+)

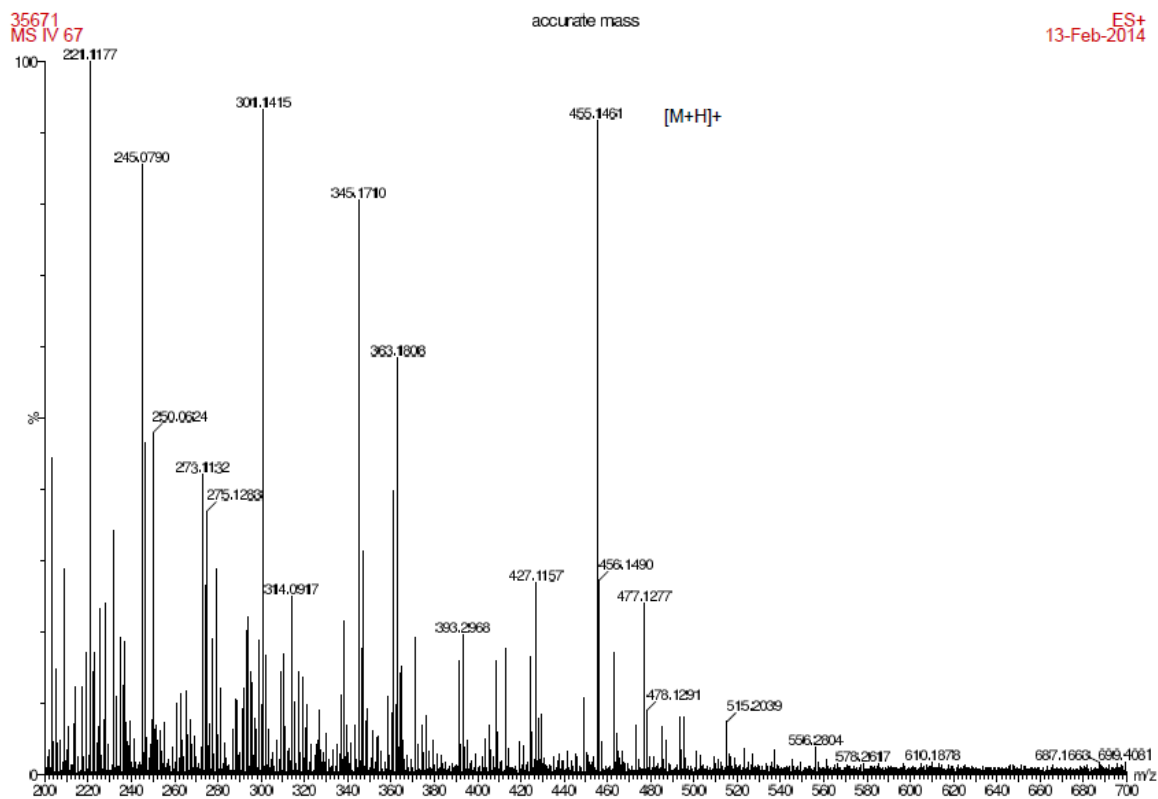

<sup>1</sup>H NMR (600 MHz, DMSO)

MS-III-67-600 in DMSO  
proton spectrum  
temp=25C

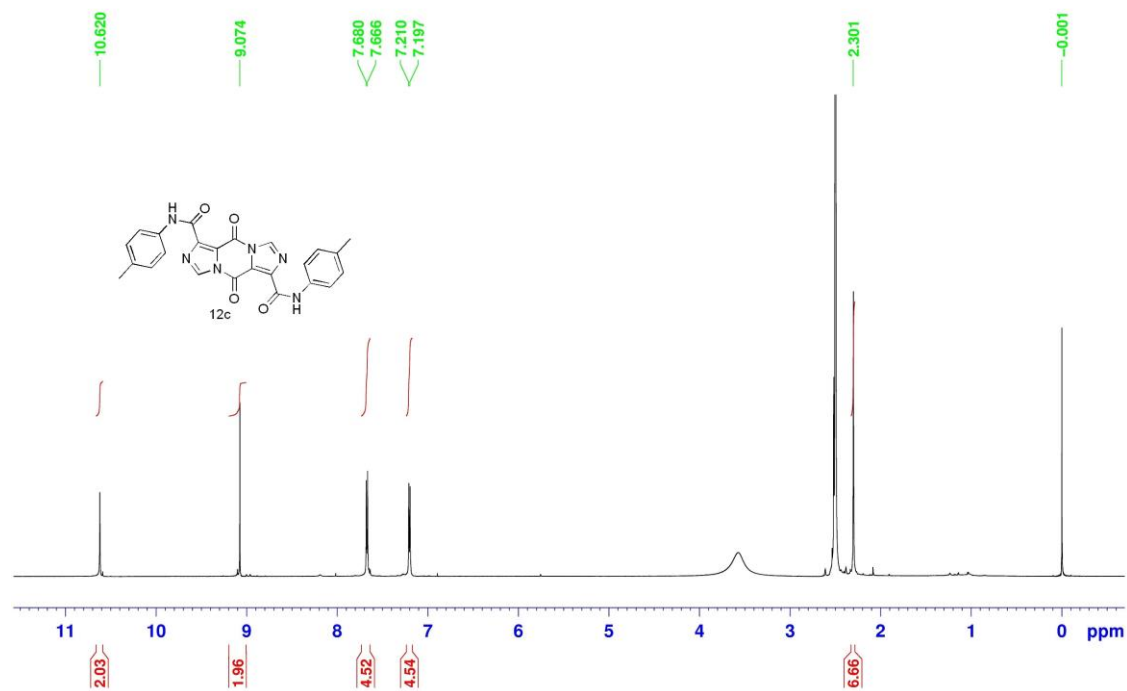

# $^{13}\text{C}$ NMR (150 MHz, DMSO)

MS-III-67-600 in DMSO  
 $^{13}\text{C}$  spectrum

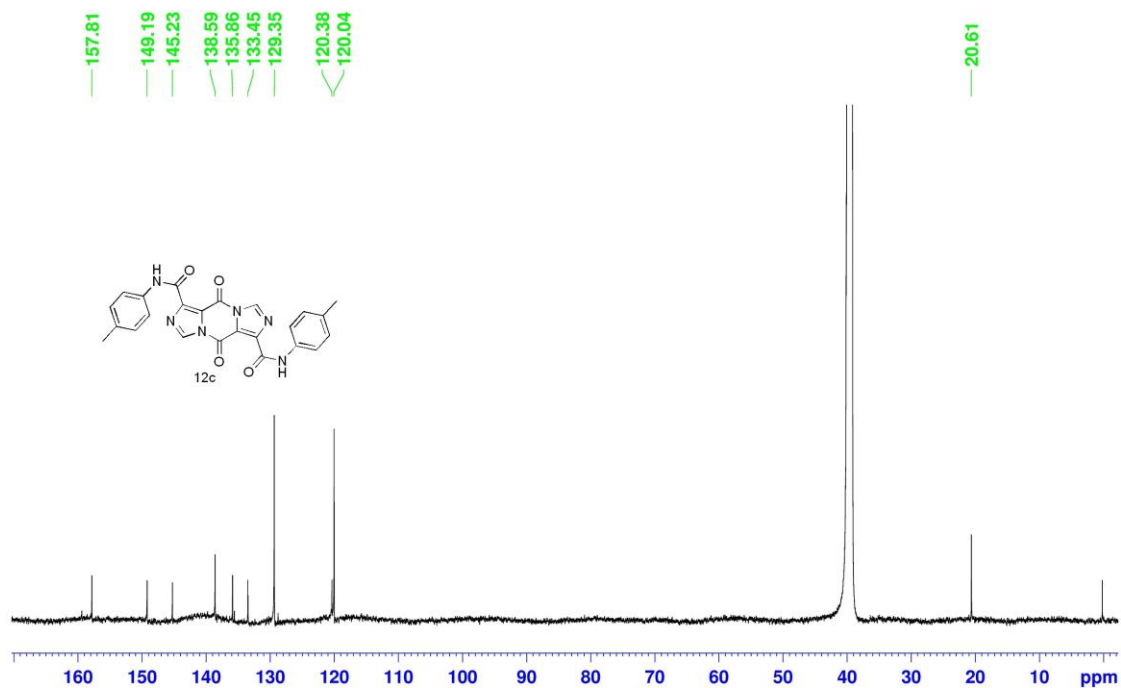

## $N^1, N^6$ -bis(4-methyl-2-(thiophen-2-yl)phenyl)-5,10-dioxo-5,10-dihydroimidazo[1,5-a:1',5'-d]pyrazine-1,6-dicarboxamide (**12d**) HRMS (ES<sup>+</sup>)

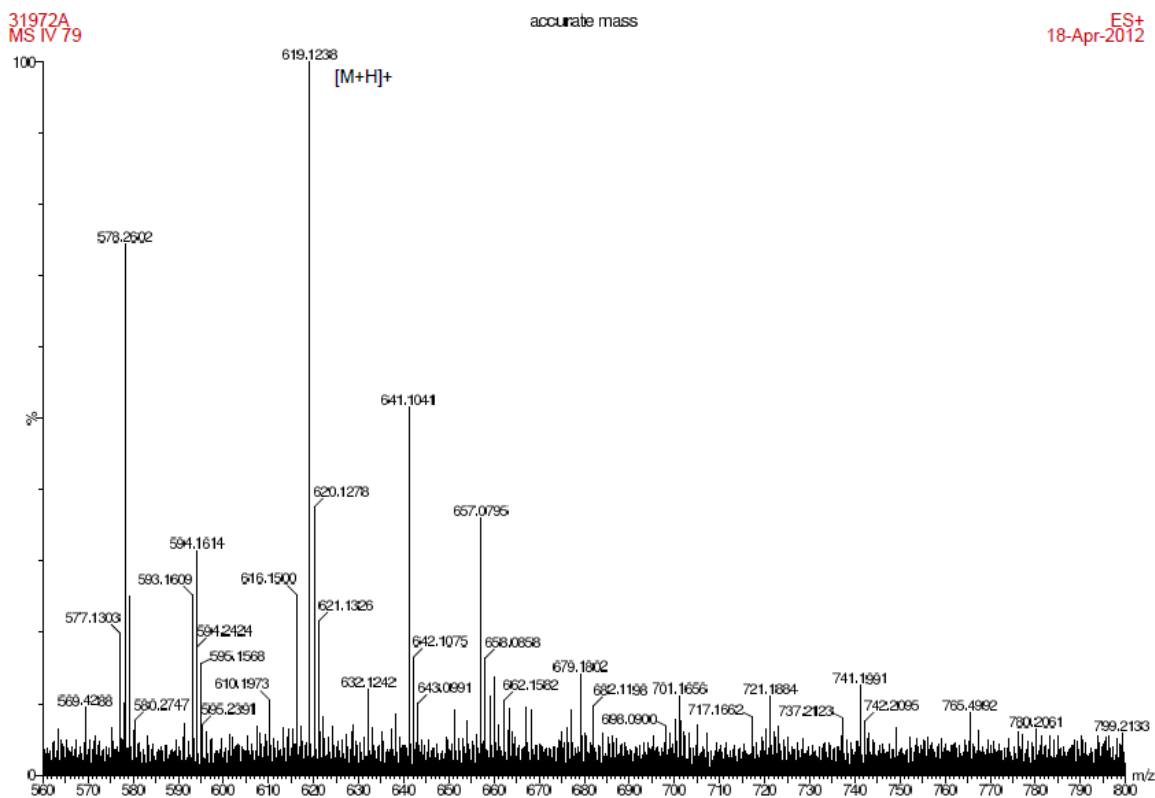

$^1\text{H}$  NMR (500 MHz,  $\text{CDCl}_3$ )

MS-IV-77 in DMSO

19/04/2012

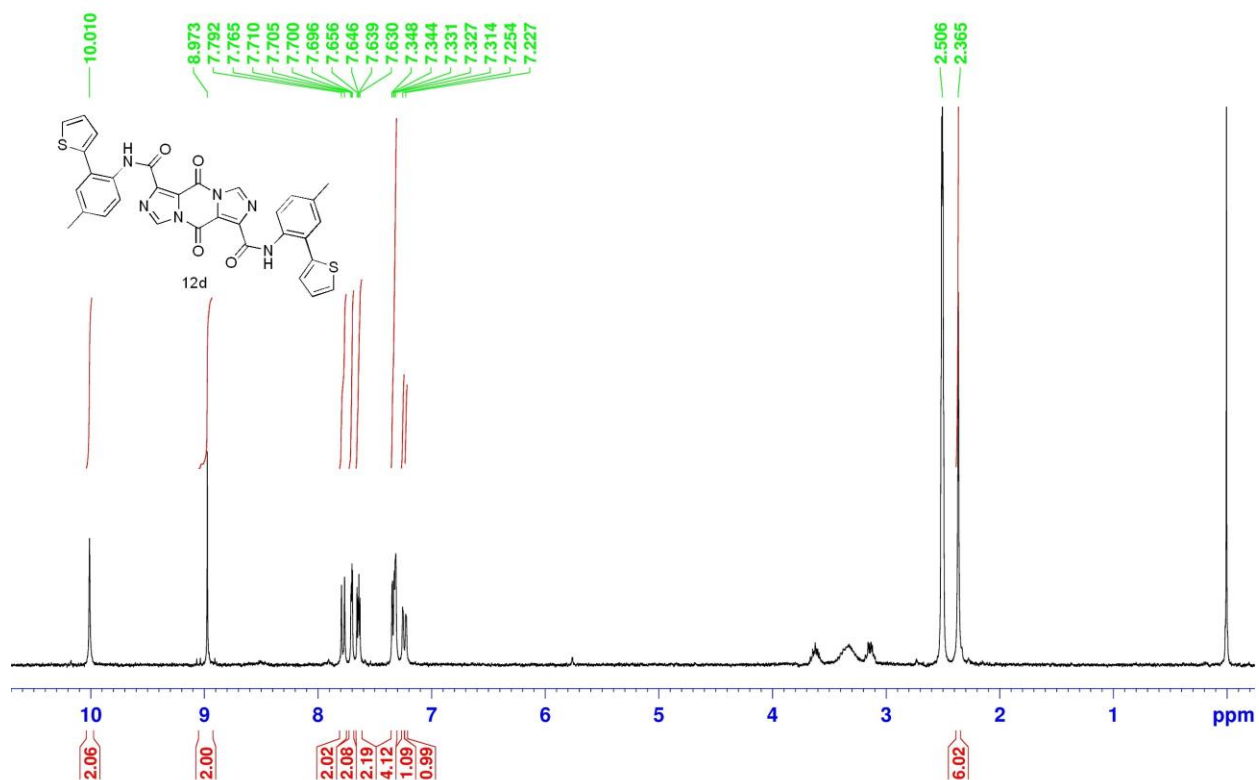

$N^1, N^6$ -bis(2-(furan-2-yl)-4-methylphenyl)-5,10-dioxo-5,10-dihydroimidazo  
[1,5-a:1',5'-d]pyrazine-1,6-dicarboxamide (12e)

HRMS (ES $^+$ )

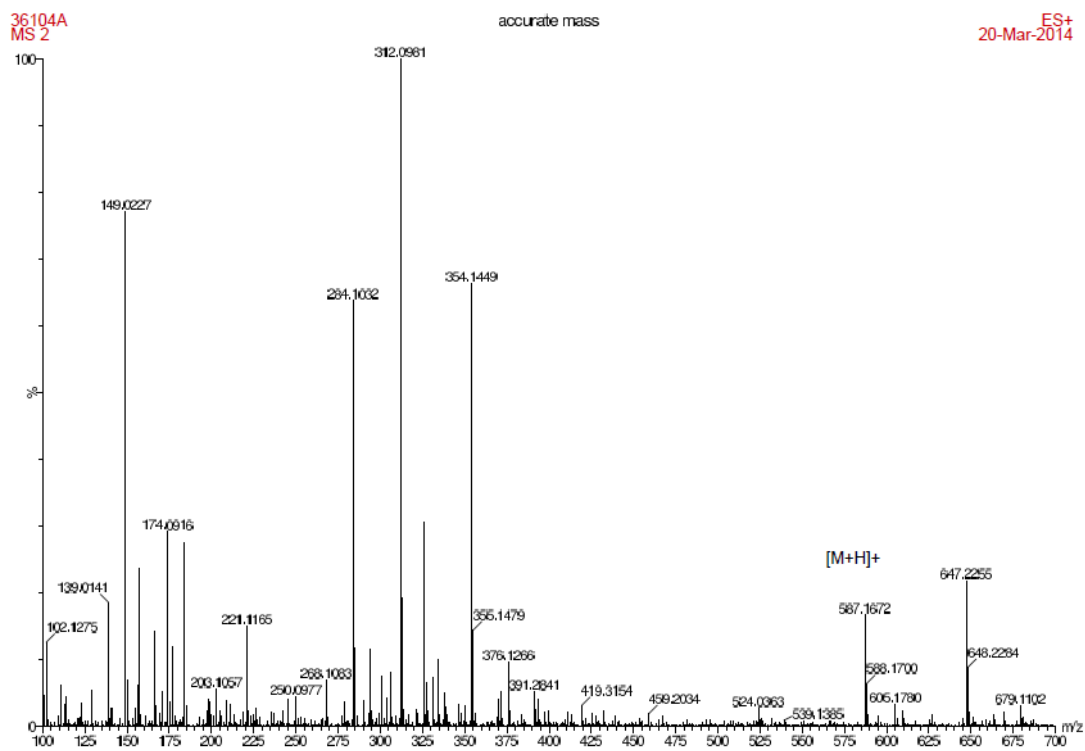



# <sup>1</sup>H NMR (500 MHz, CDCl<sub>3</sub>)

MS-IV-04 in DMSO  
20/09/2011

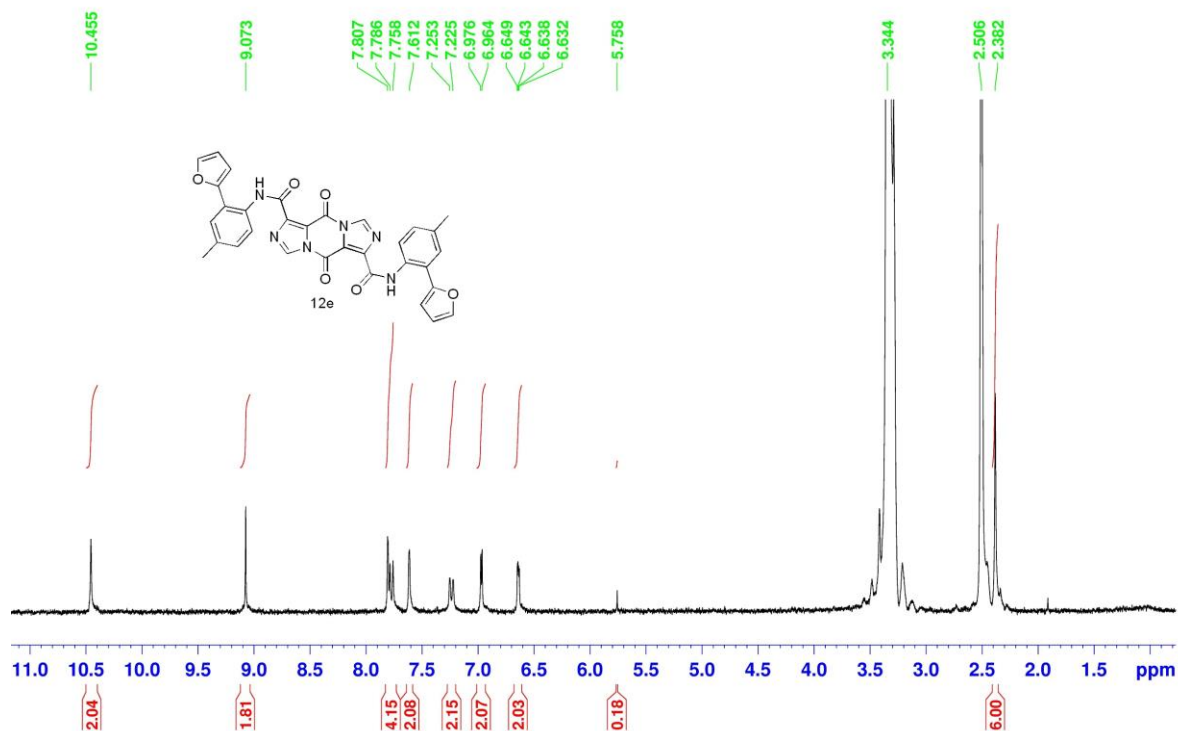

## 4-methyl-2-(pyridin-3-yl) aniline (14b)

### HRMS (ES+)

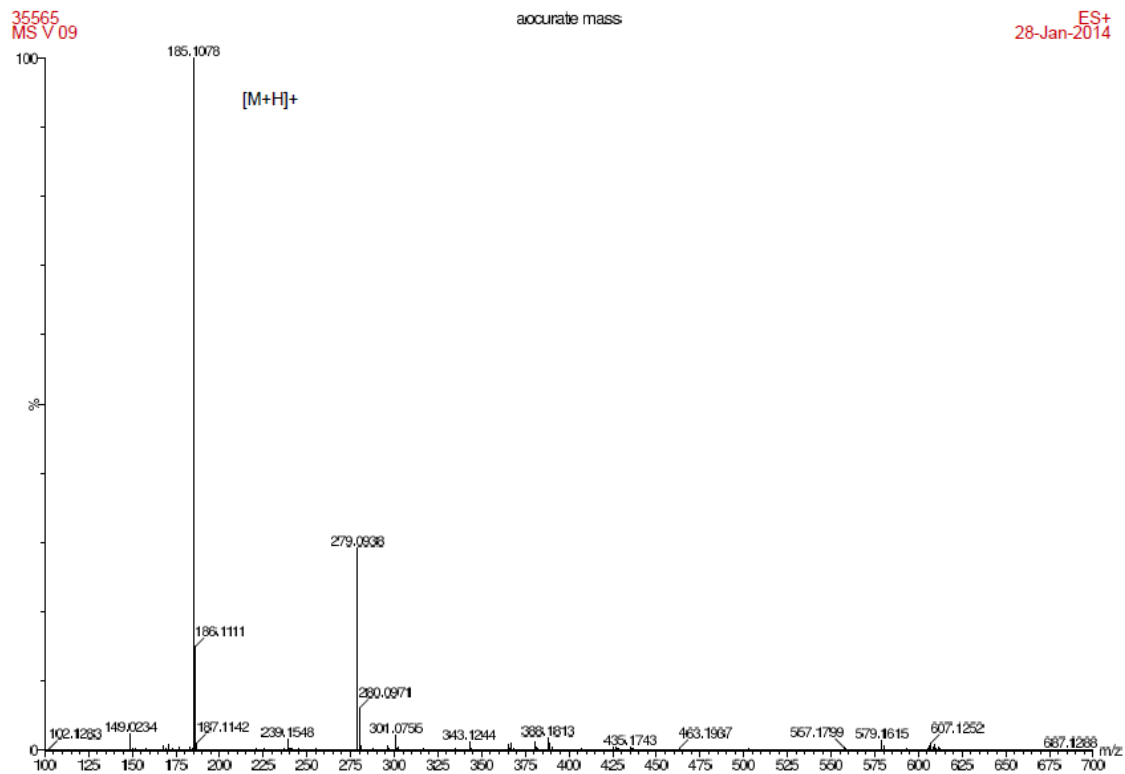

# <sup>1</sup>H NMR (300 MHz, CDCl<sub>3</sub>)

MS-V-09 in CDCl<sub>3</sub> 300 mhz  
25/01/2014

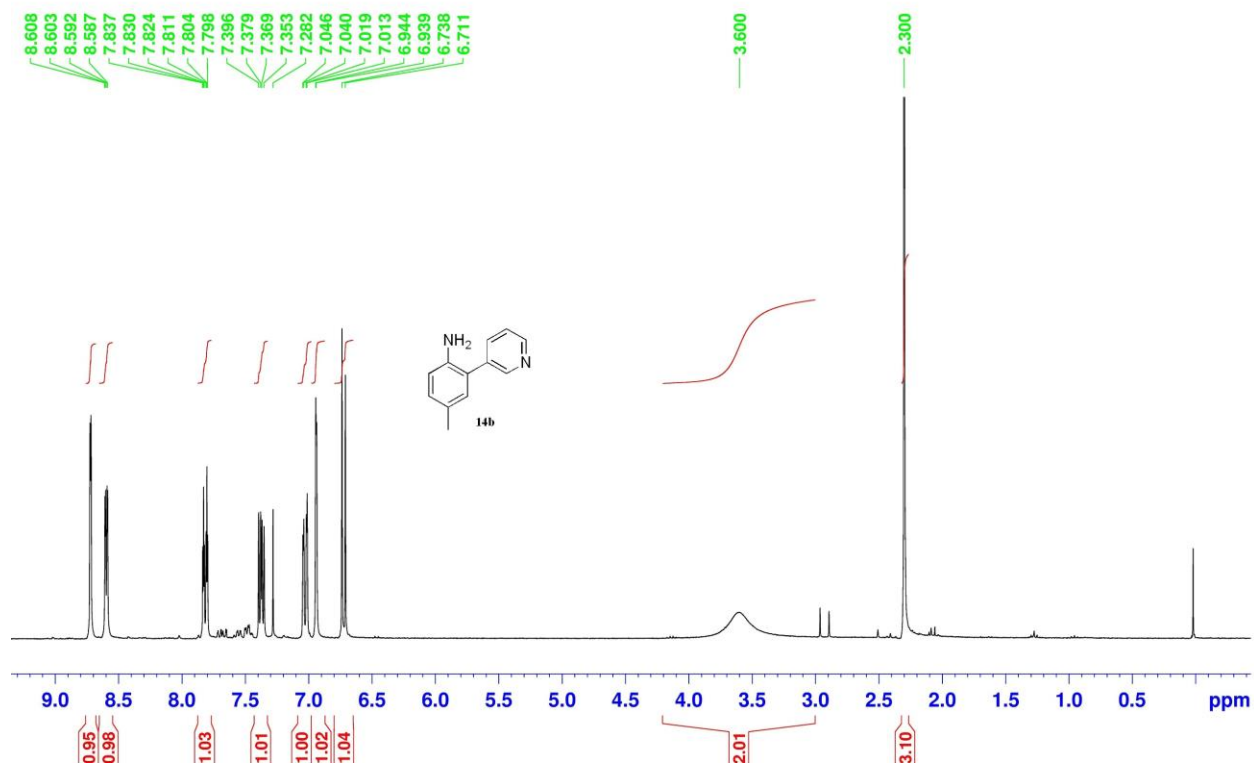

# <sup>13</sup>C NMR (75 MHz, CDCl<sub>3</sub>)

MS-V-09 C13 in CDCl<sub>3</sub> 300 mhz  
25/01/2014

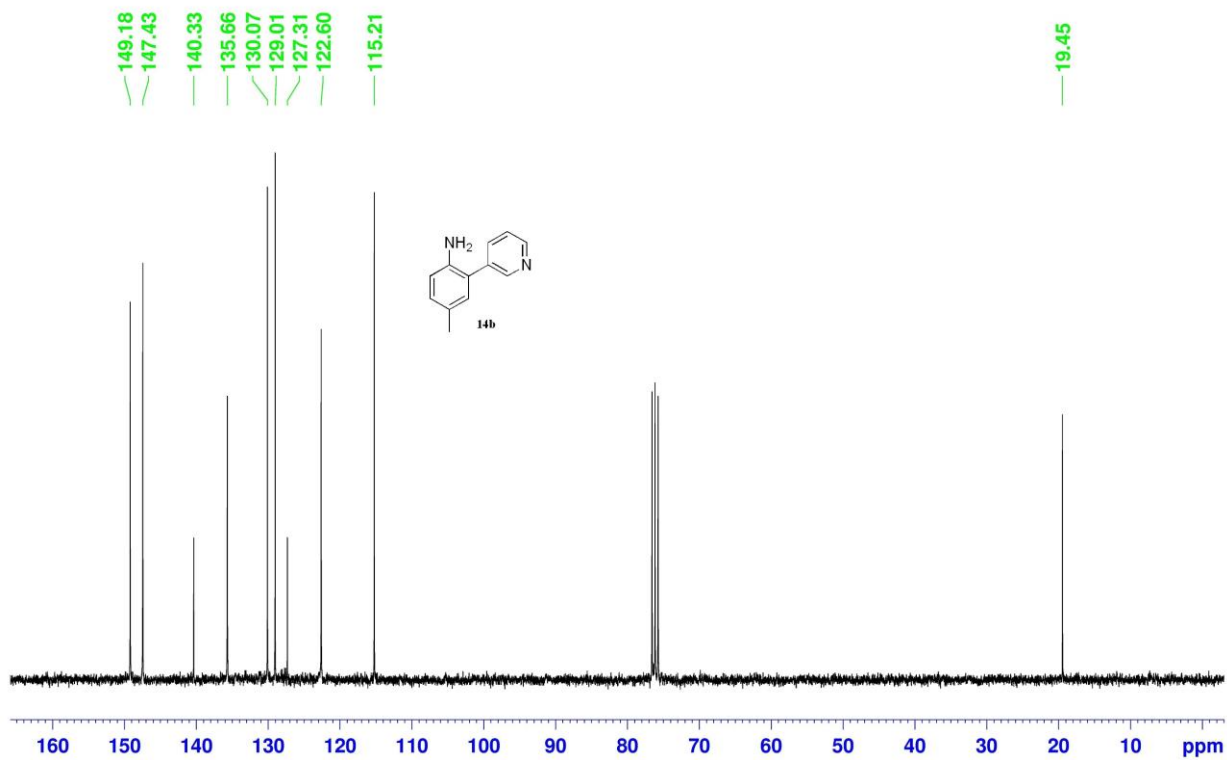

# 4-methyl-2-(pyridin-4-yl)aniline (14c)

HRMS (ES+)

35549  
MS V 04

accurate mass

ES+  
28-Jan-2014

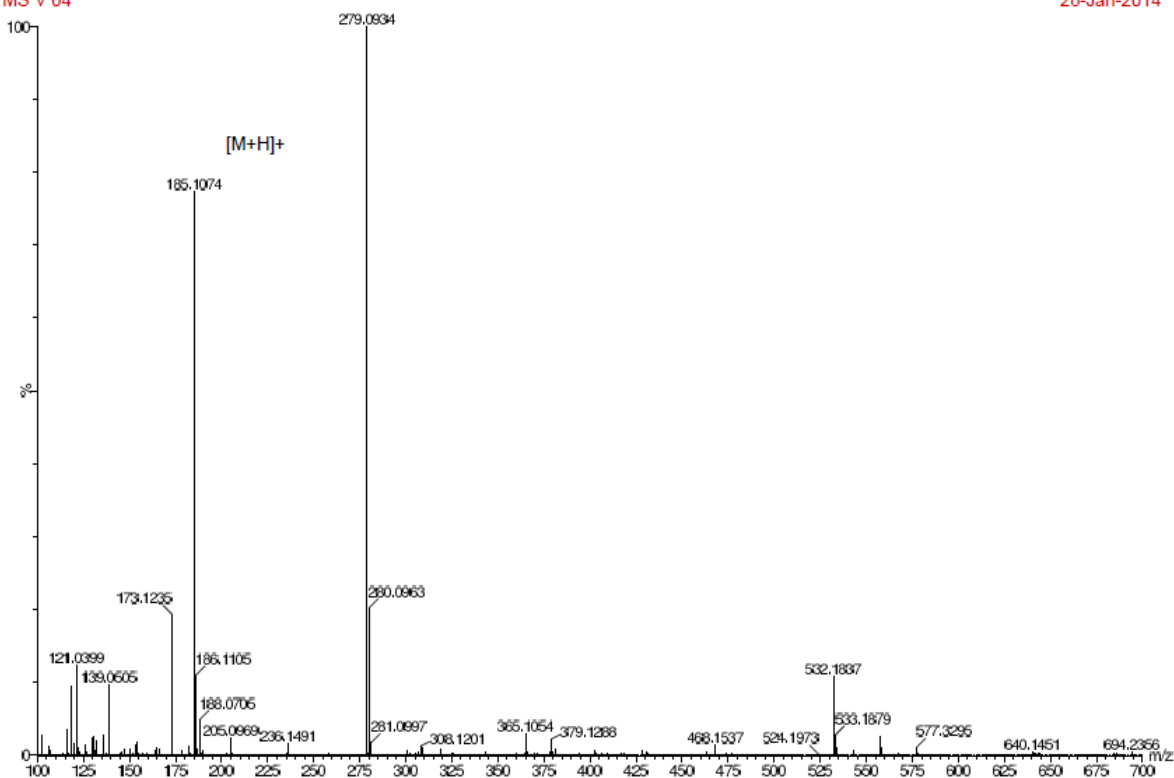

<sup>1</sup>H NMR (300 MHz, CDCl<sub>3</sub>)

MS-V-04 in CDCl<sub>3</sub> 300 mhz  
25/01/2014

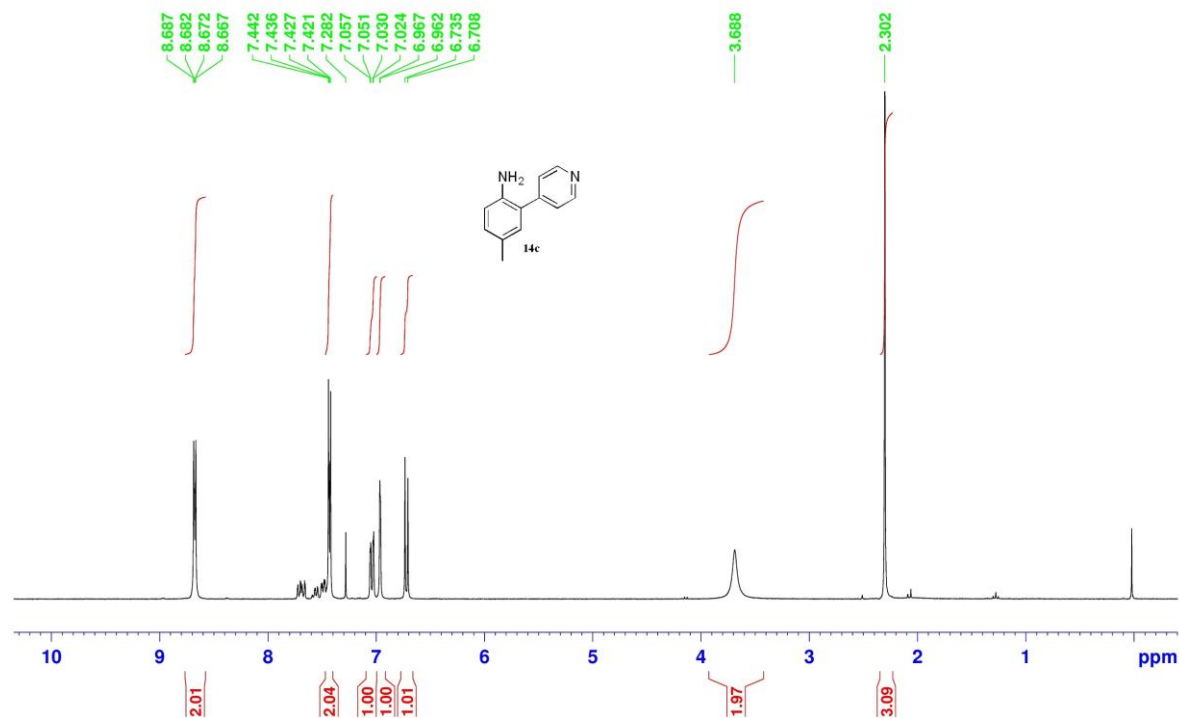

<sup>13</sup>C NMR (75 MHz, CDCl<sub>3</sub>)

MS-V-04 in CDCl<sub>3</sub> C13 300 mhz  
25/01/2014

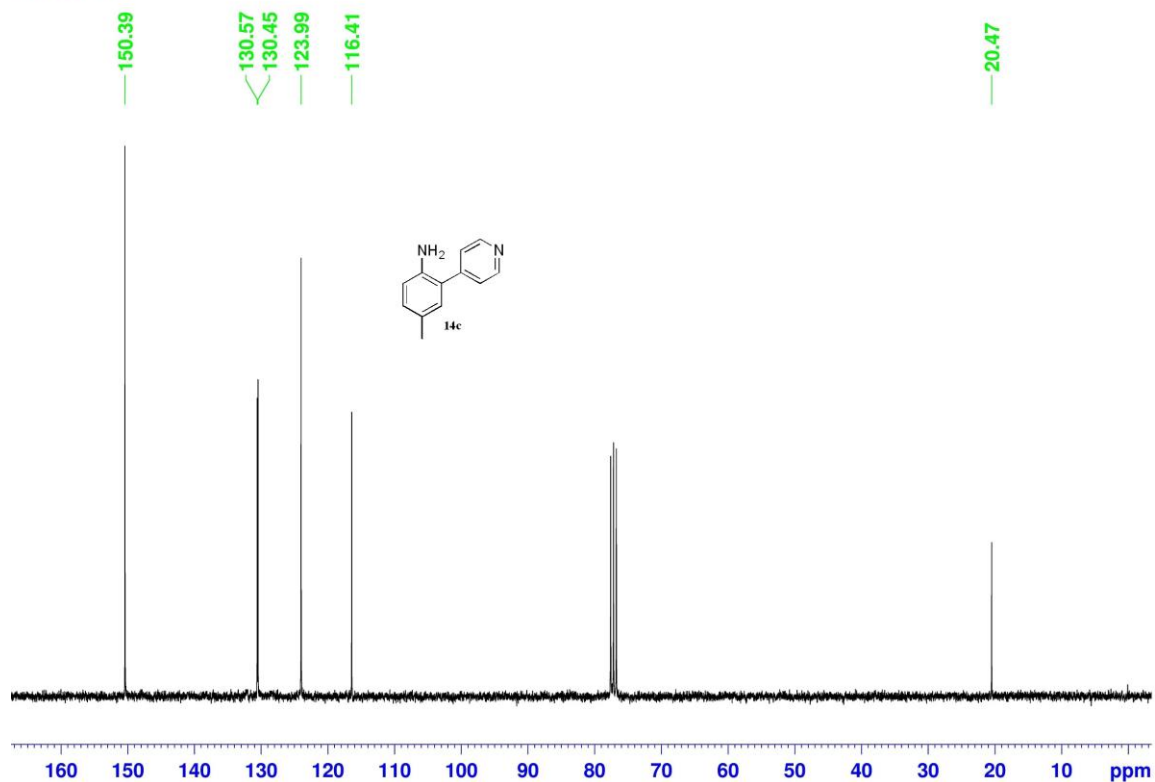

**2-(pyridin-3-yl)aniline (14d)**

HRMS (ES+)

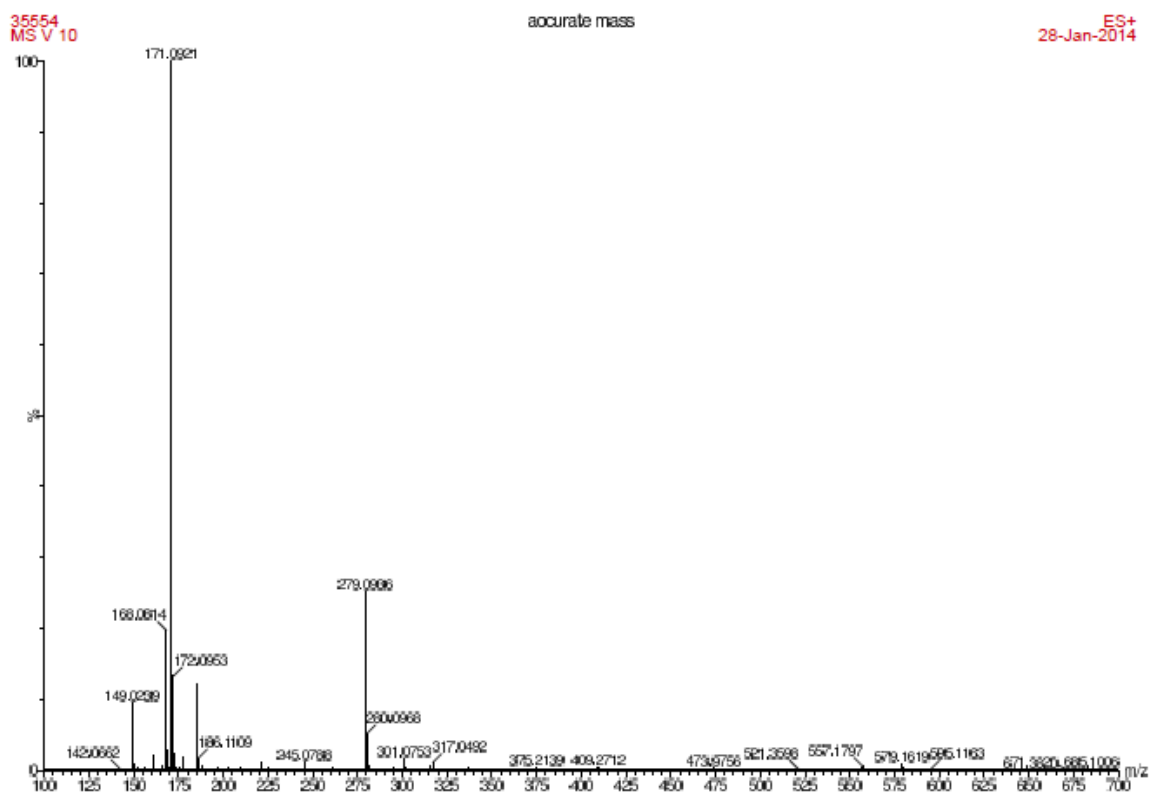

# <sup>1</sup>H NMR (300 MHz, CDCl<sub>3</sub>)

MS-V-10 in CDCl<sub>3</sub> 300 mhz  
25/01/2014

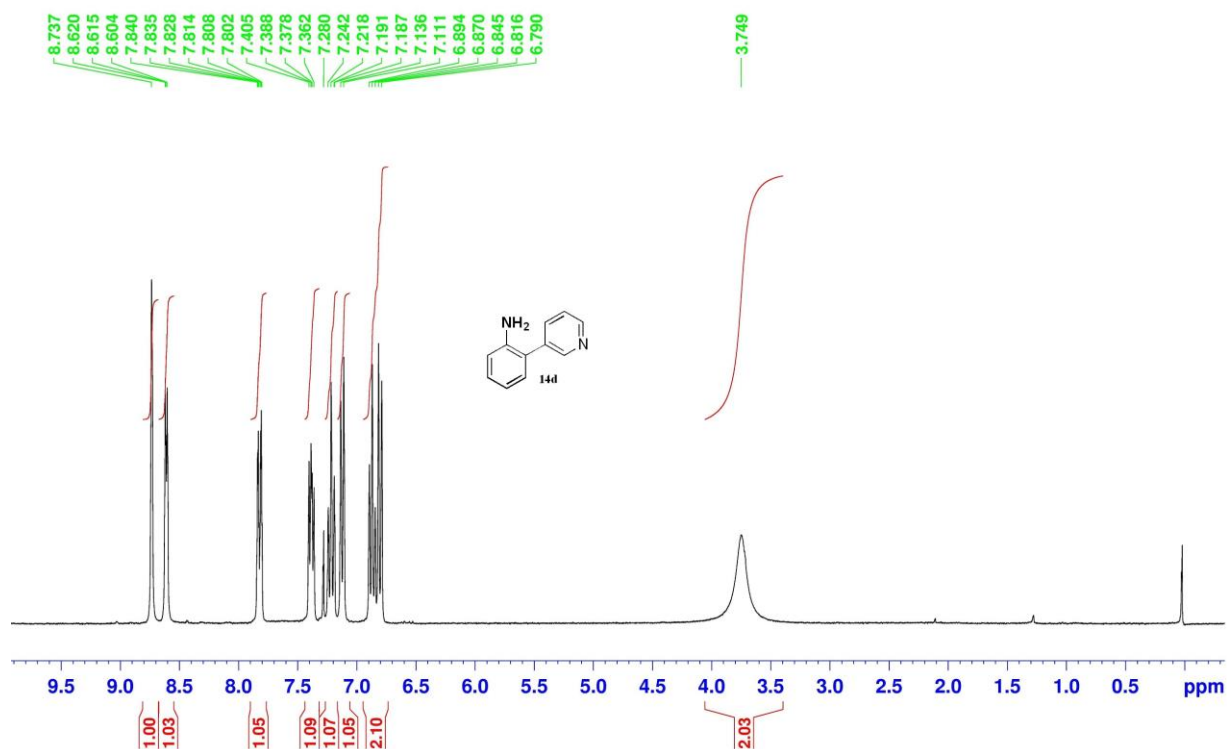

# <sup>13</sup>C NMR (75 MHz, CDCl<sub>3</sub>)

MS-V-10 C13 in CDCl<sub>3</sub> 300 mhz  
25/01/2014

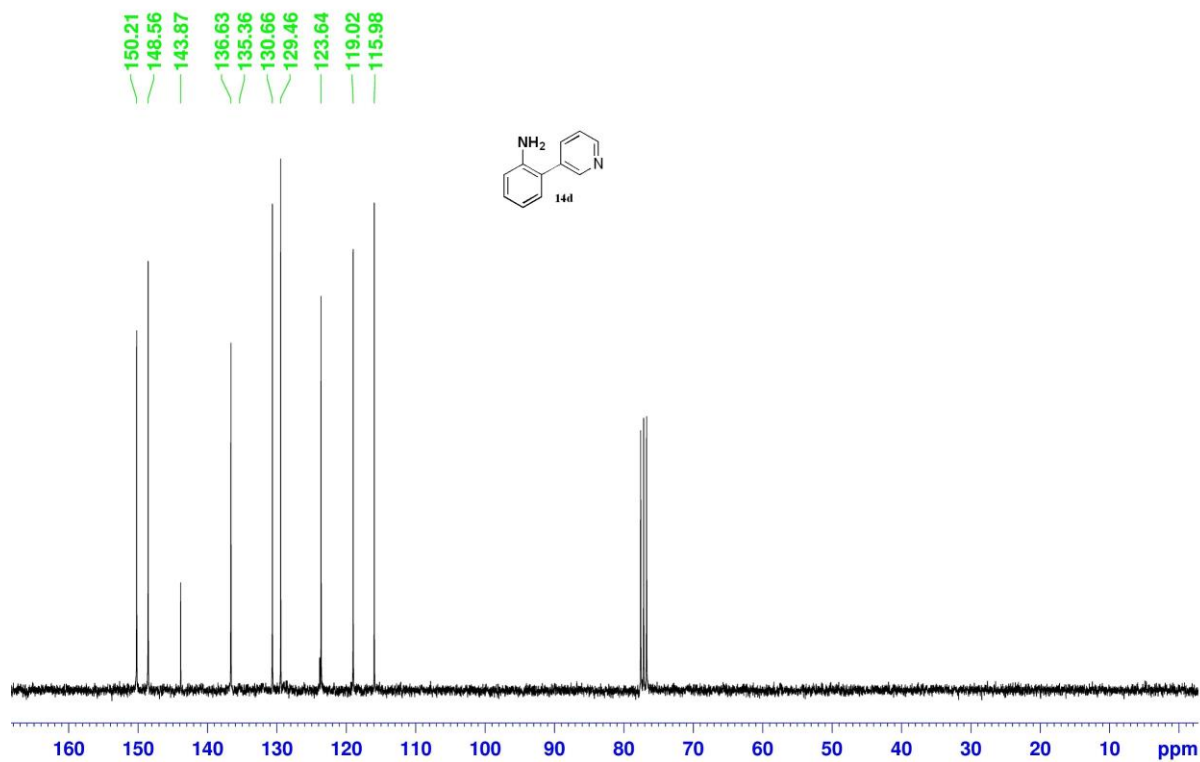

## 2-(pyridin-4-yl)aniline (14e)

HRMS (ES+)

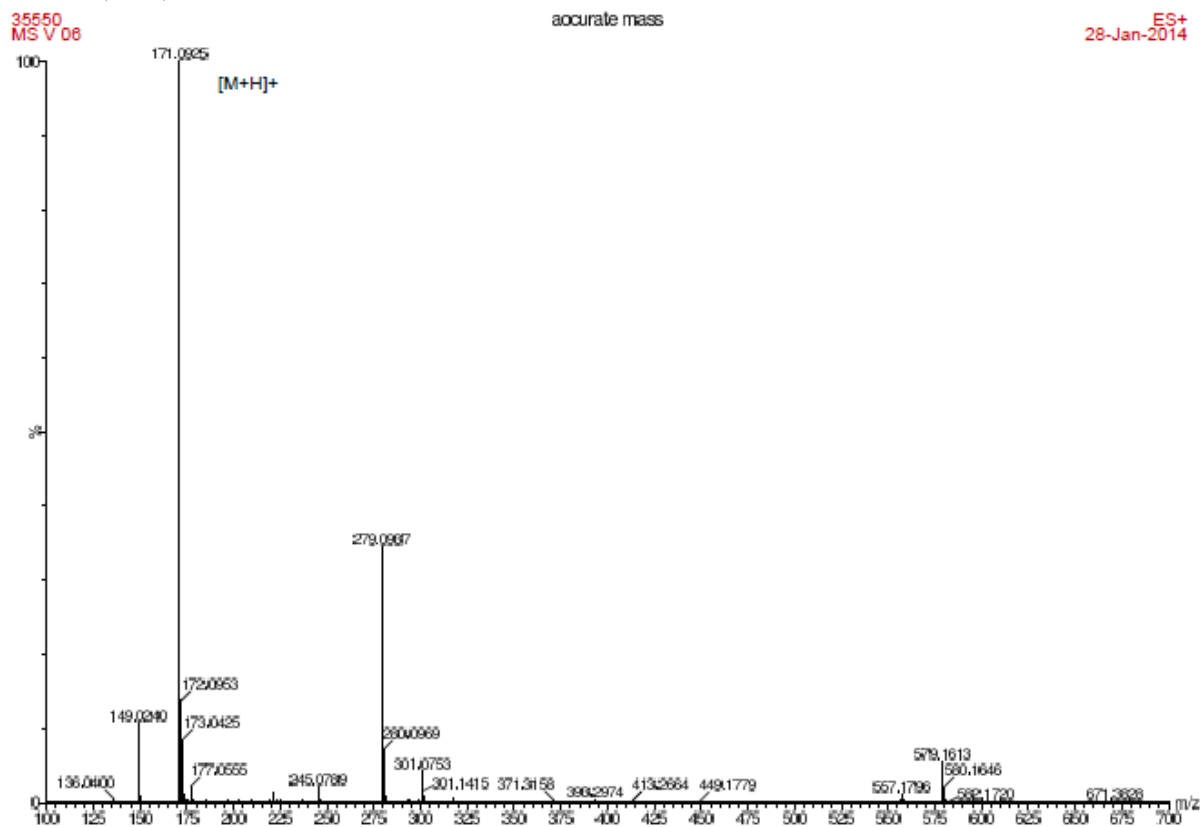

## $^1\text{H}$ NMR (300 MHz, $\text{CDCl}_3$ )

MS-V-06 in  $\text{CDCl}_3$  300 mhz  
25/01/2014

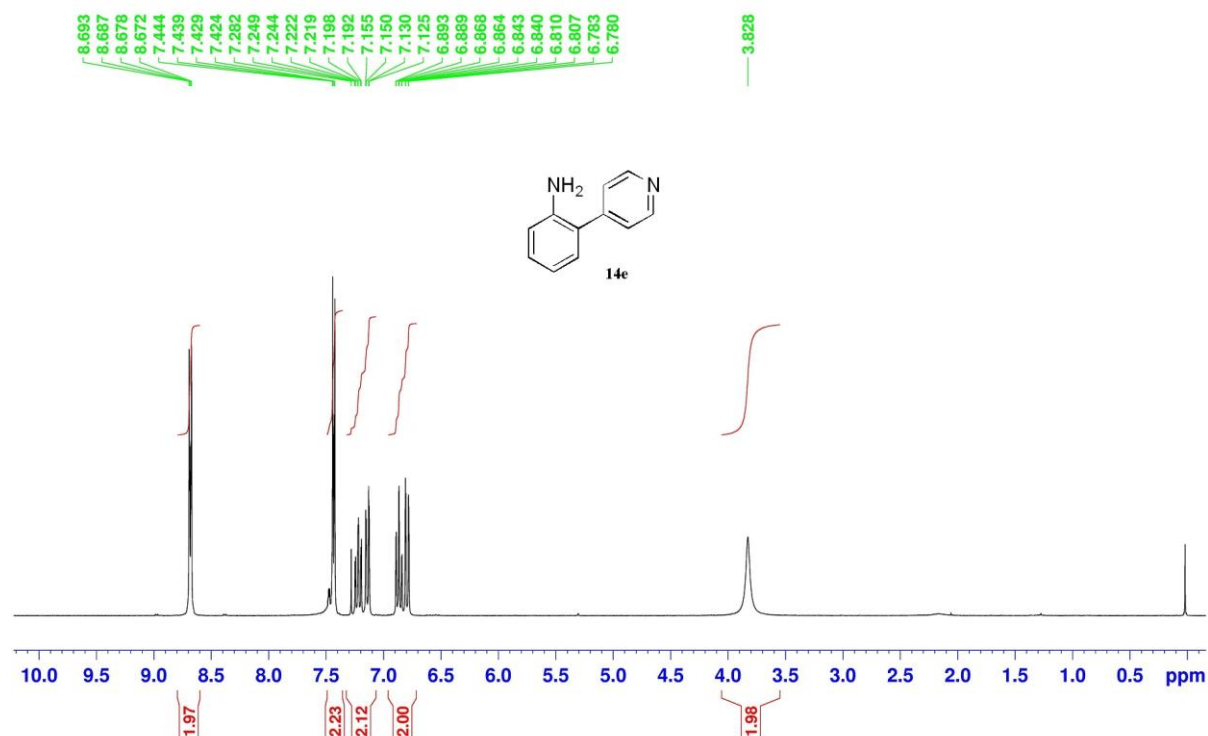

<sup>13</sup>C NMR (75 MHz, CDCl<sub>3</sub>)

MS-V-06 C13 in CDCl3 300 mhz  
25/01/2014

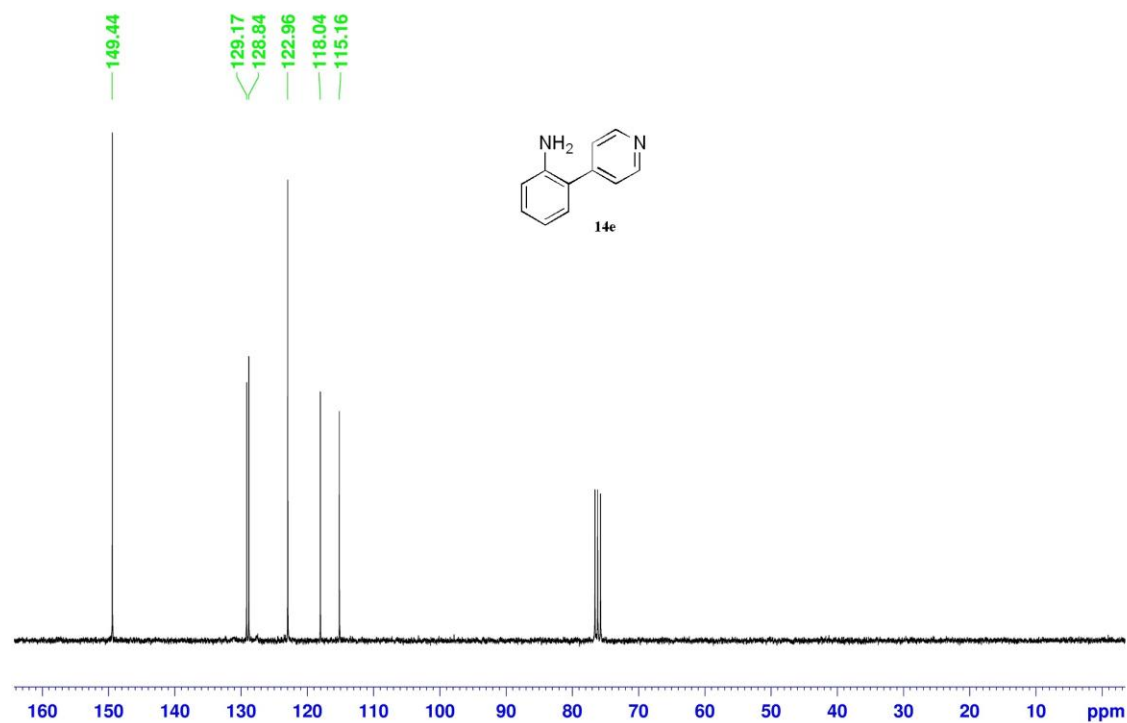

**(4-(pyridin-3-yl)phenyl)methanamine (14f)**

HRMS (ES+)

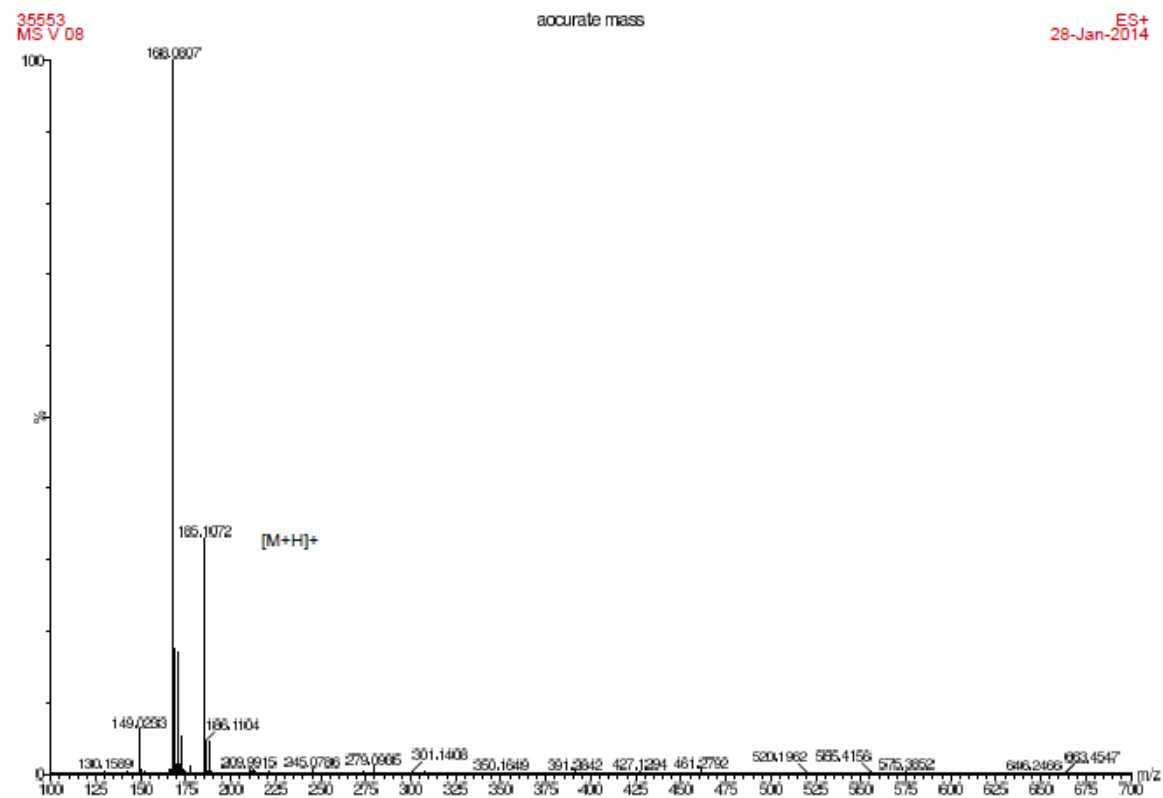

# $^1\text{H}$ NMR (300 MHz, $\text{CDCl}_3$ )

MS-V-08 in  $\text{CDCl}_3$   
28/05/2012

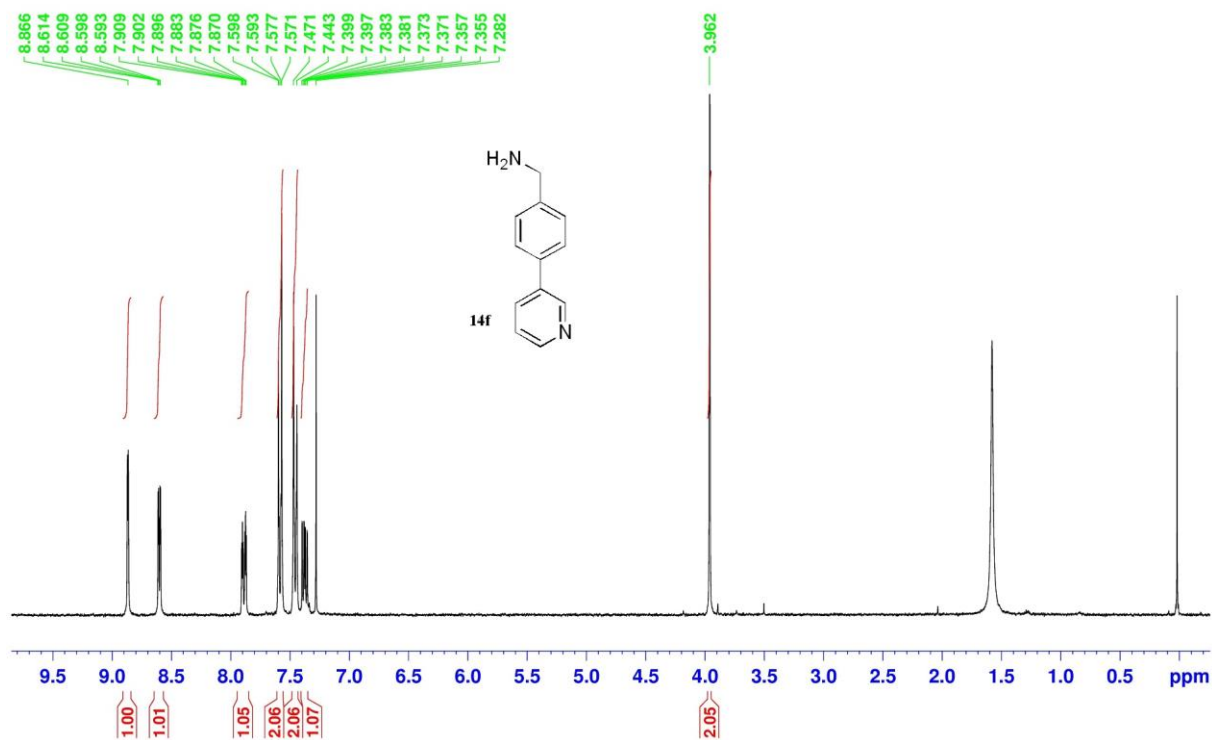

# $^{13}\text{C}$ NMR (75 MHz, $\text{CDCl}_3$ )

MS-V-08 C13 in  $\text{CDCl}_3$  300 mhz  
25/01/2014

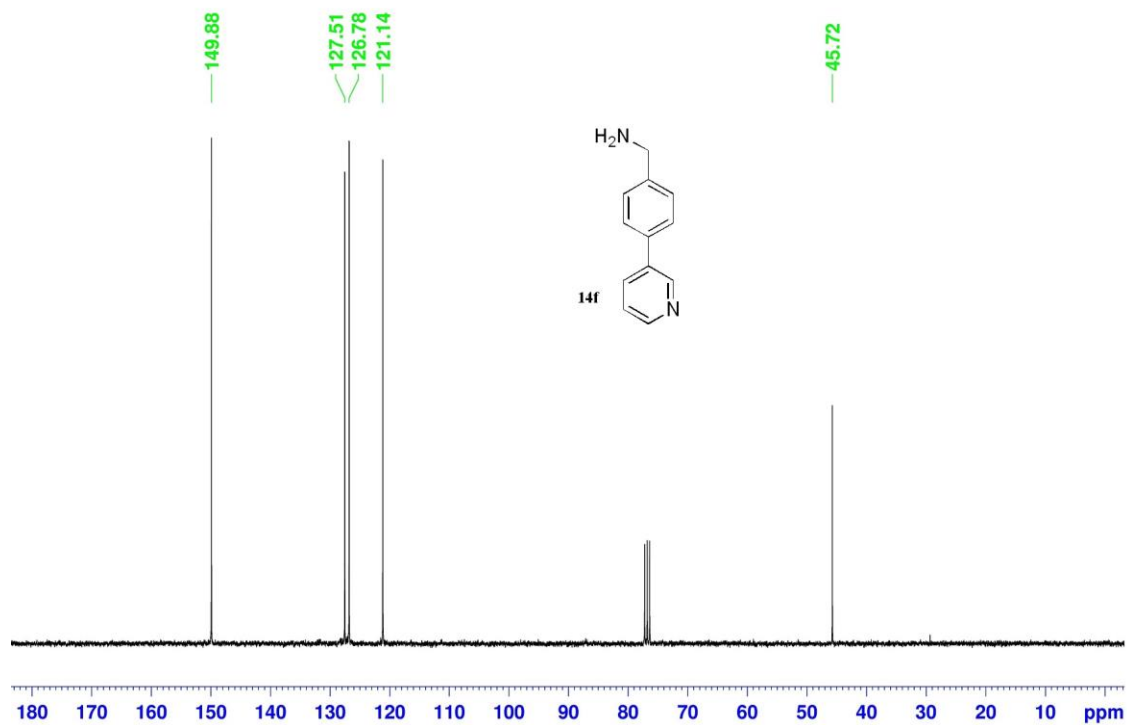



**(4-(pyridin-4-yl)phenyl)methanamine (14g)**

<sup>1</sup>H NMR (500 MHz, CDCl<sub>3</sub>)

MS-V-07 in CDCl<sub>3</sub> 300 mhz  
25/01/2014

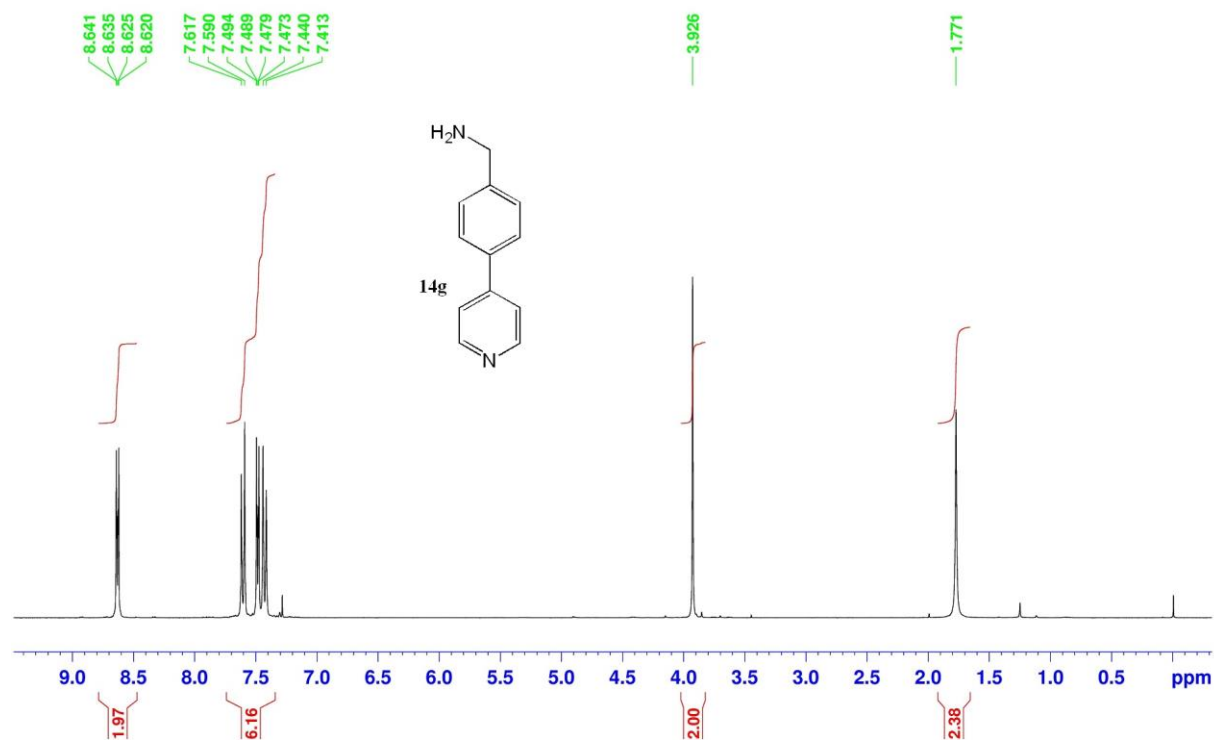

<sup>13</sup>C NMR (75 MHz, CDCl<sub>3</sub>)

MS-V-07 C13 in CDCl<sub>3</sub> 300 mhz  
25/01/2014

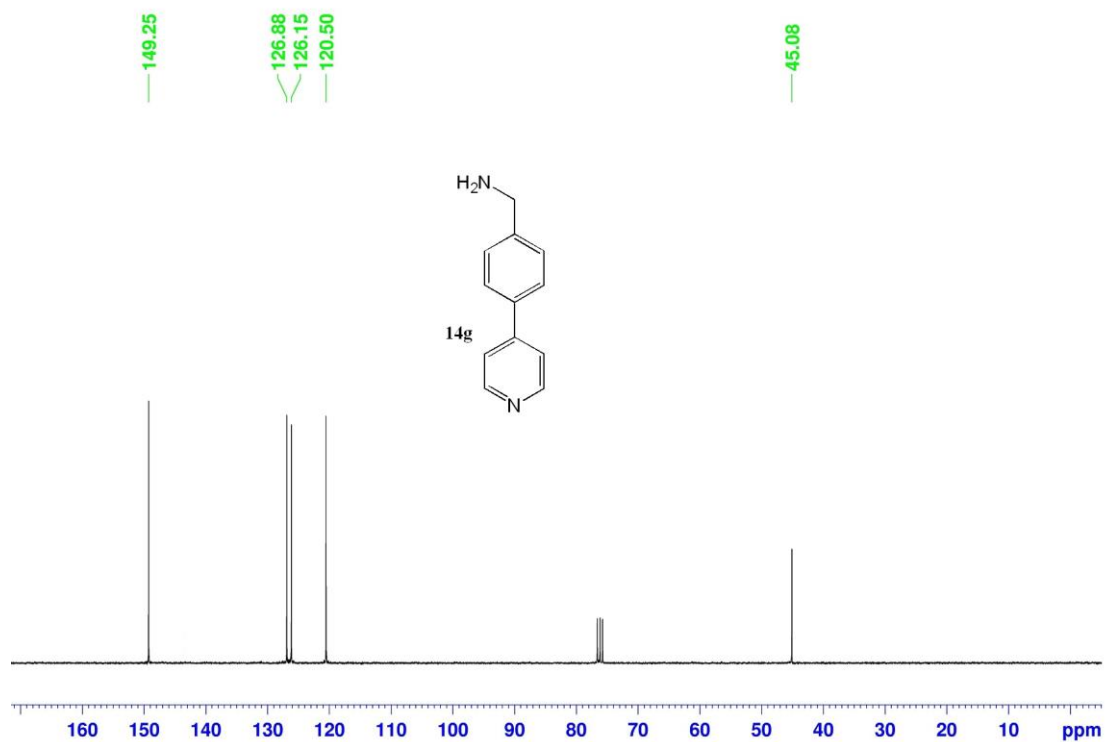

# (2-(pyridin-4-yl)phenyl)methanamine (14h)

$^1\text{H}$  NMR (300 MHz,  $\text{CDCl}_3$ )

MS-V-05 in  $\text{CDCl}_3$  300 mhz  
25/01/2014

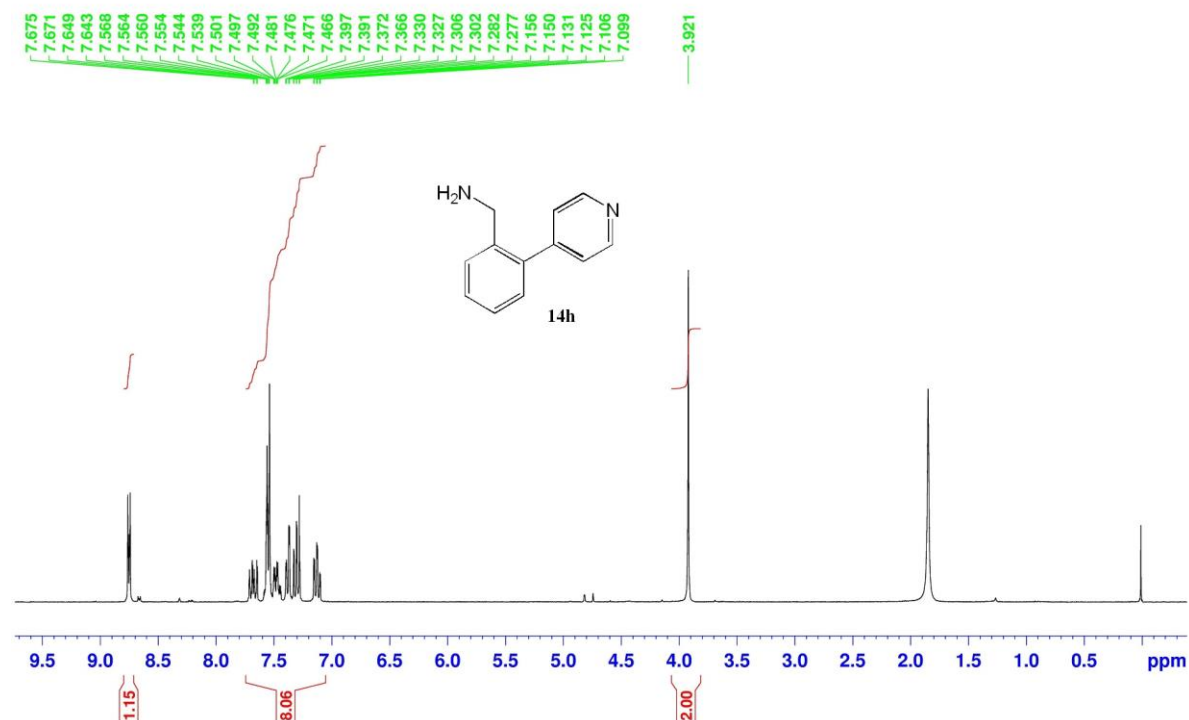

$^{13}\text{C}$  NMR (75 MHz,  $\text{CDCl}_3$ )

MS-V-05 C13 in  $\text{CDCl}_3$  300 mhz  
25/01/2014

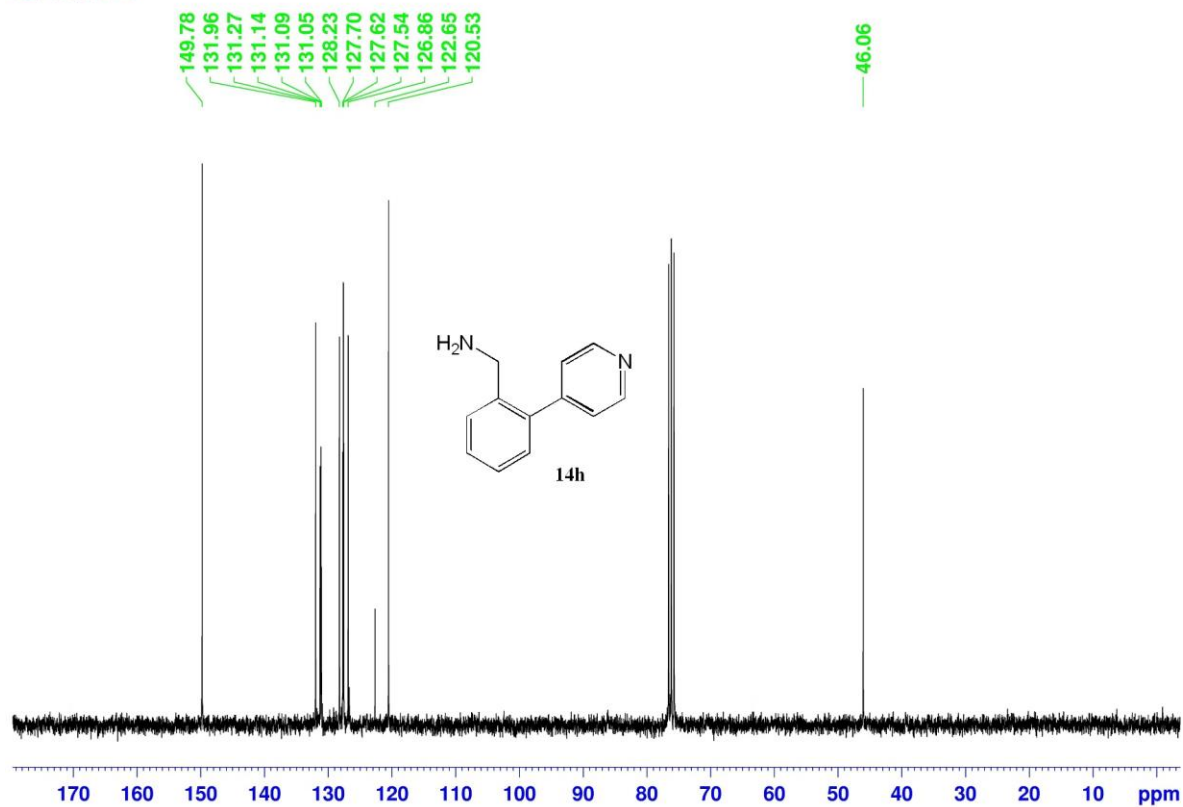

# 4-methyl-2-(thiophen-3-yl)aniline (14i)

HRMS (ES+)

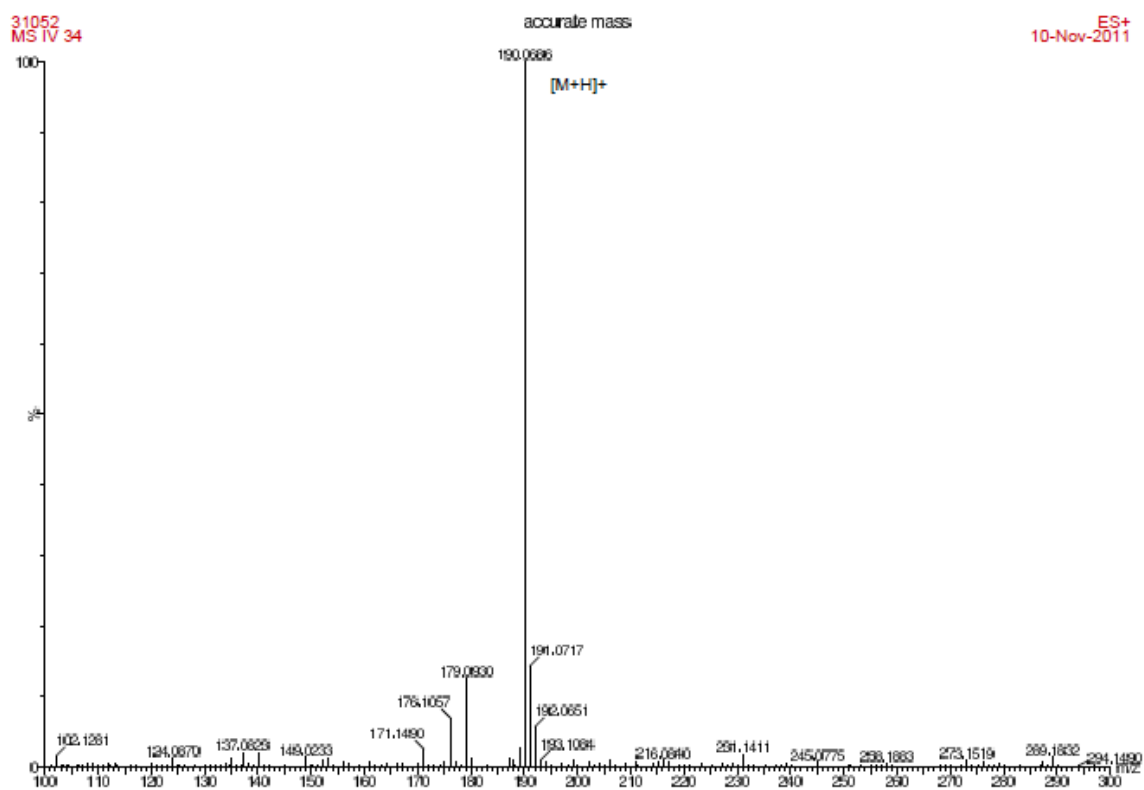

# <sup>1</sup>H NMR (300 MHz, CDCl<sub>3</sub>)

MS-IV-34 in CDCl<sub>3</sub> 300 mhz  
25/01/2014

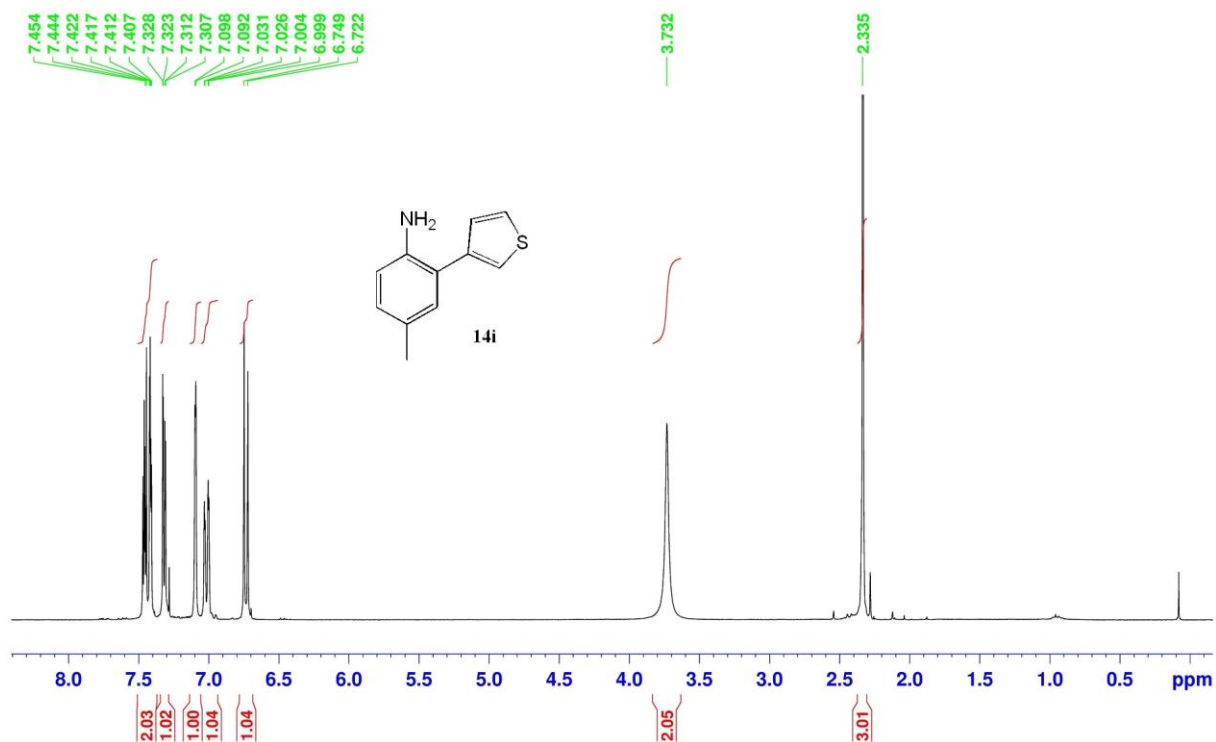

$^{13}\text{C}$  NMR (75 MHz,  $\text{CDCl}_3$ )

MS-IV-34 C13 in  $\text{CDCl}_3$  300 mhz  
25/01/2014

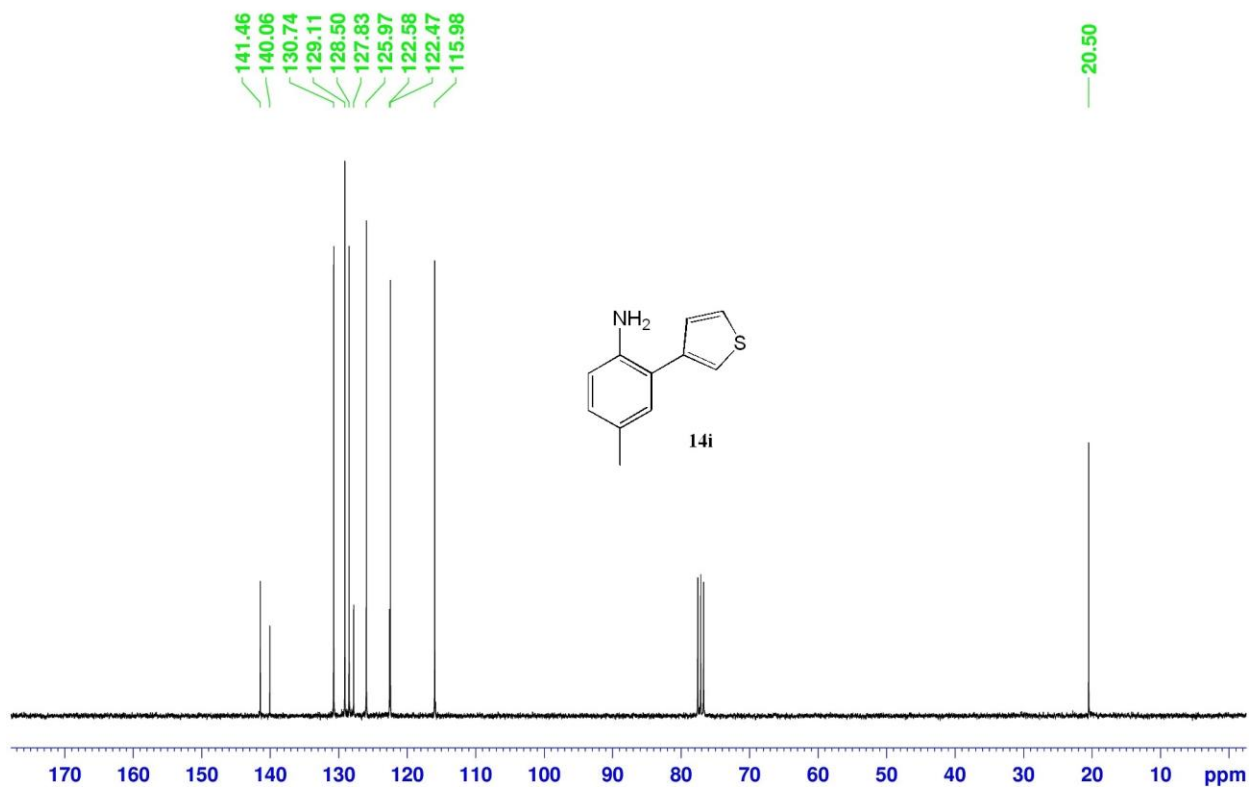

(4-(thiophen-3-yl)phenyl)methanamine (14j)

$^1\text{H}$  NMR (300 MHz,  $\text{CDCl}_3$ )

MS-IV-82 in  $\text{CDCl}_3$  300 mhz  
25/01/2014

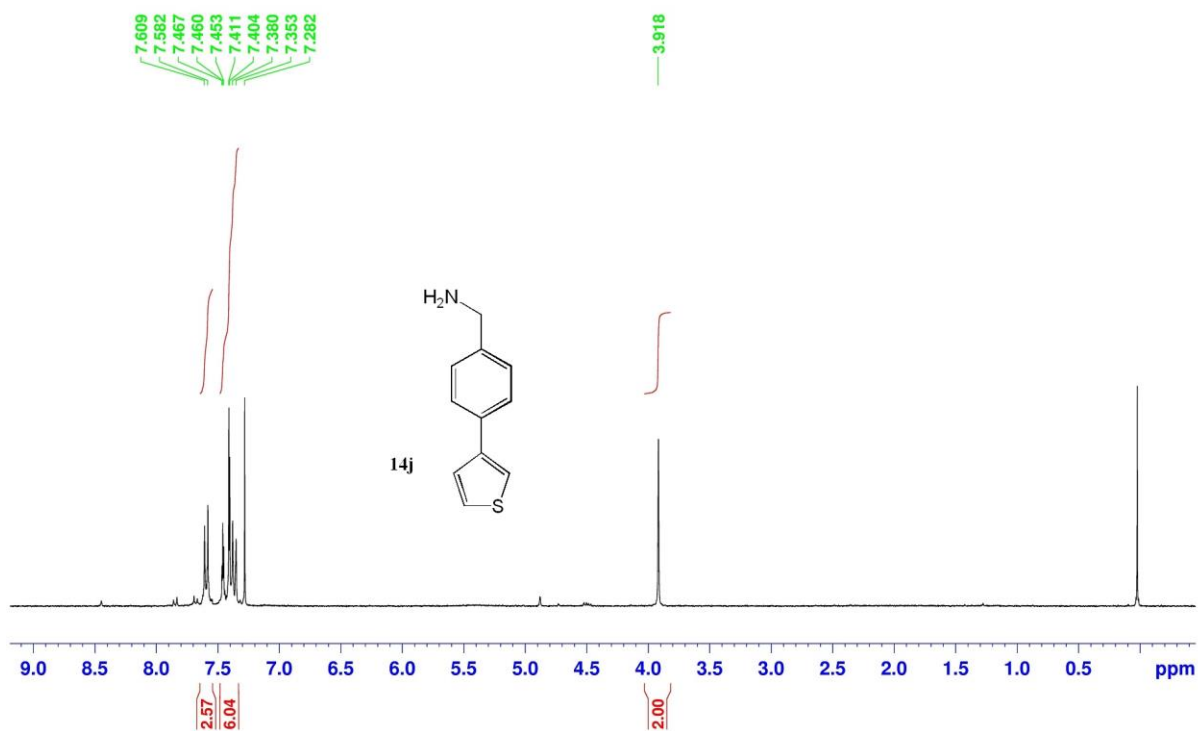

<sup>13</sup>C NMR (75 MHz, CDCl<sub>3</sub>)

MS-IV-82 C13 in CDCl<sub>3</sub> 300 mhz  
25/01/2014

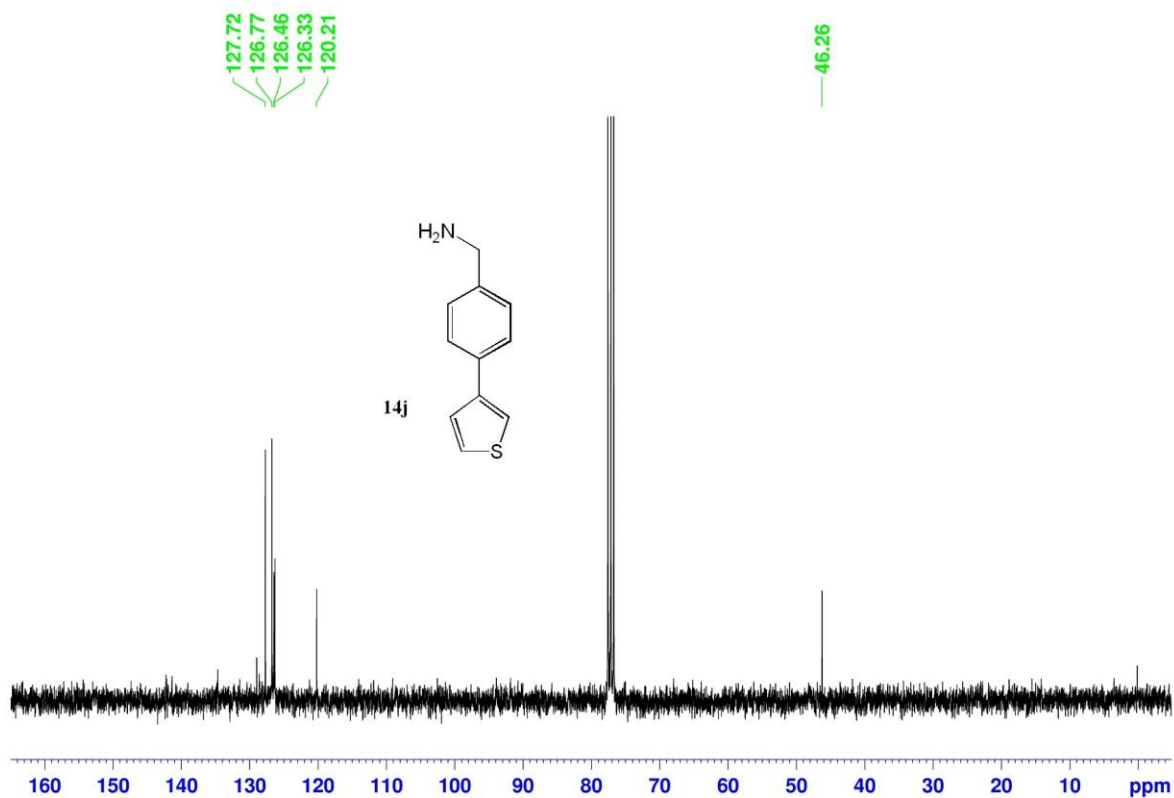

2-(thiophen-3-yl)phenylmethanamine (4.14k)

<sup>1</sup>H NMR (300 MHz, CDCl<sub>3</sub>)

MS-IV-87 in CDCl<sub>3</sub>  
25/04/2012

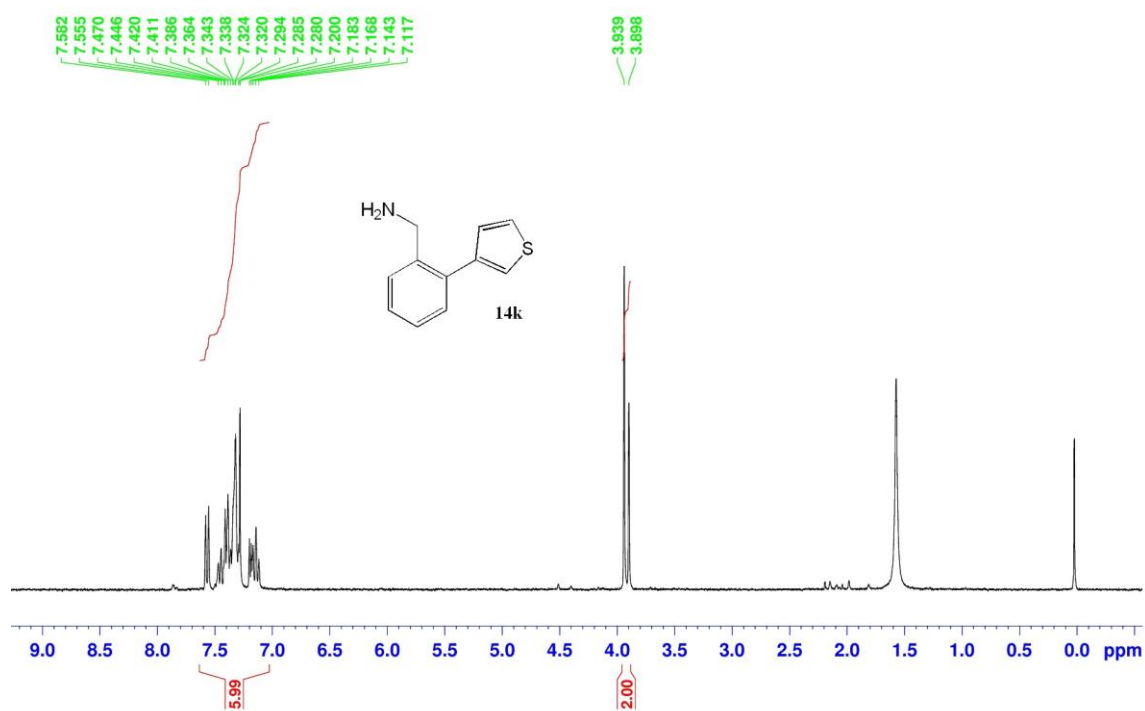

# 2-(furan-2-yl)-4-methylaniline (14l)

HRMS (ES+)

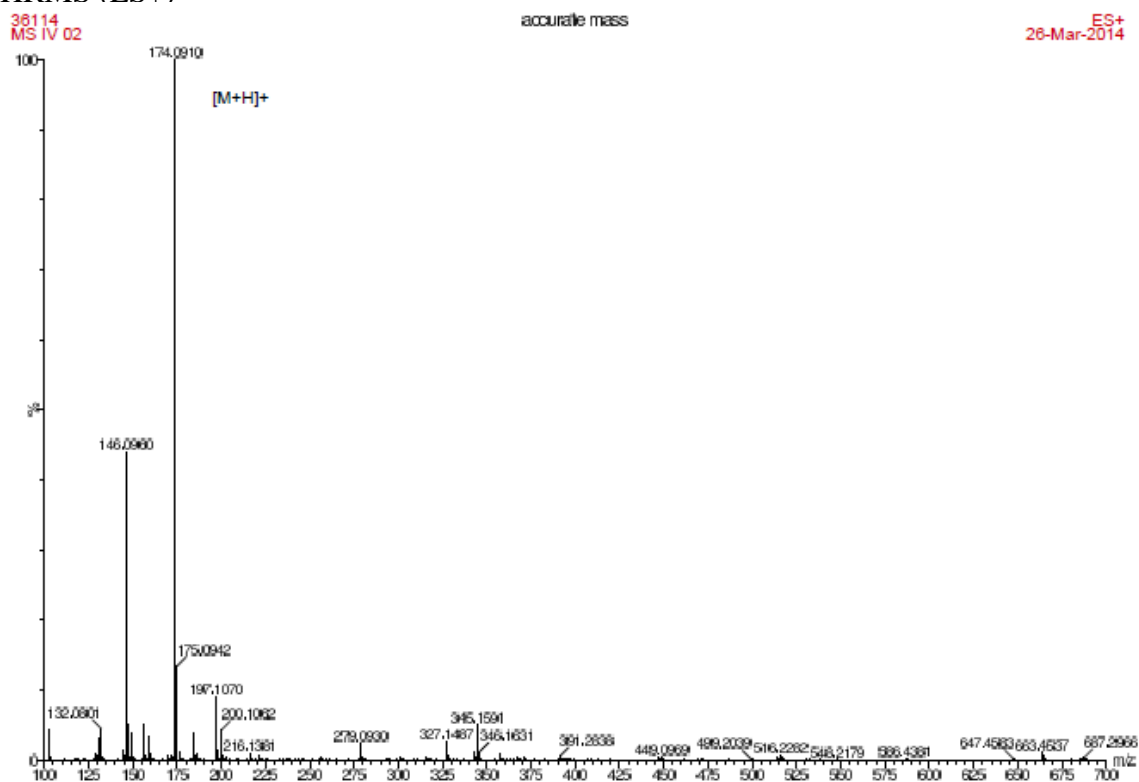

$^1\text{H NMR}$  (300 MHz,  $\text{CDCl}_3$ )

MS-III-62 in  $\text{CDCl}_3$   
11/06/2011

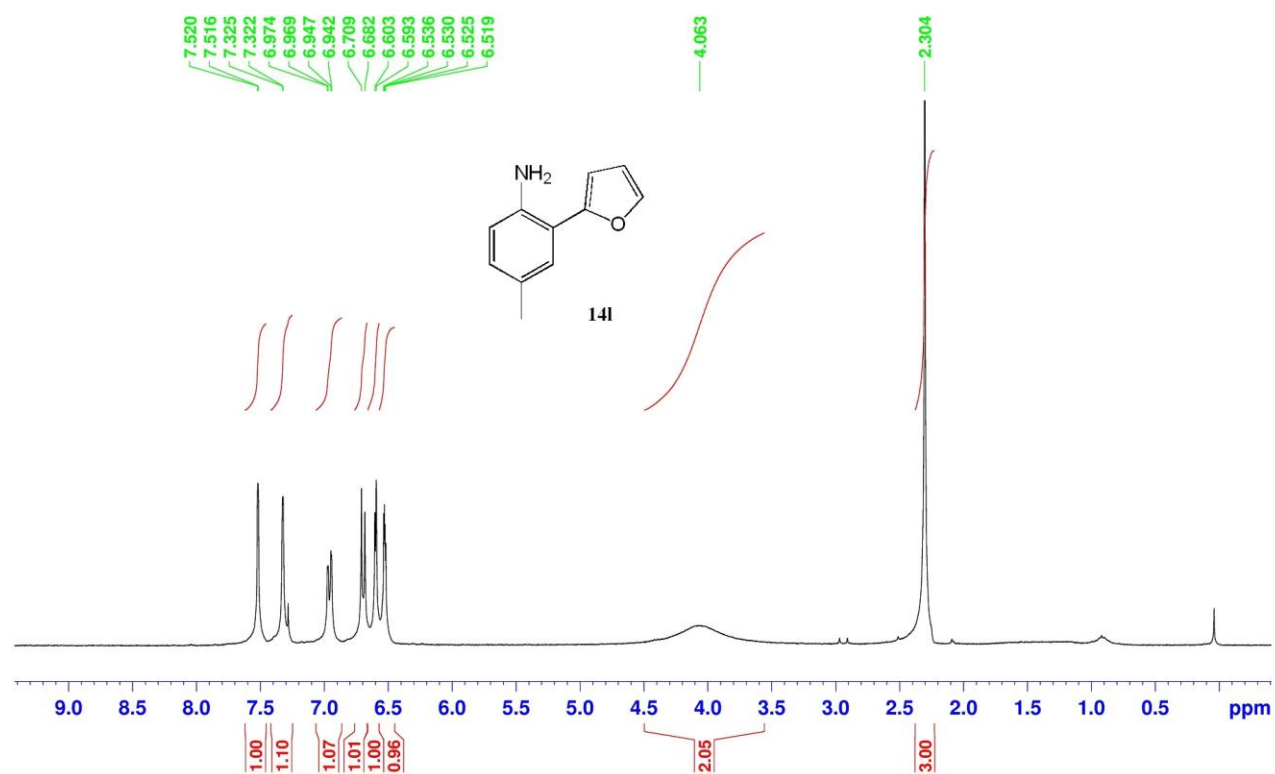

$^{13}\text{C}$  NMR (75 MHz,  $\text{CDCl}_3$ )

MS-III-62C13 in  $\text{CDCl}_3$   
11/06/2011

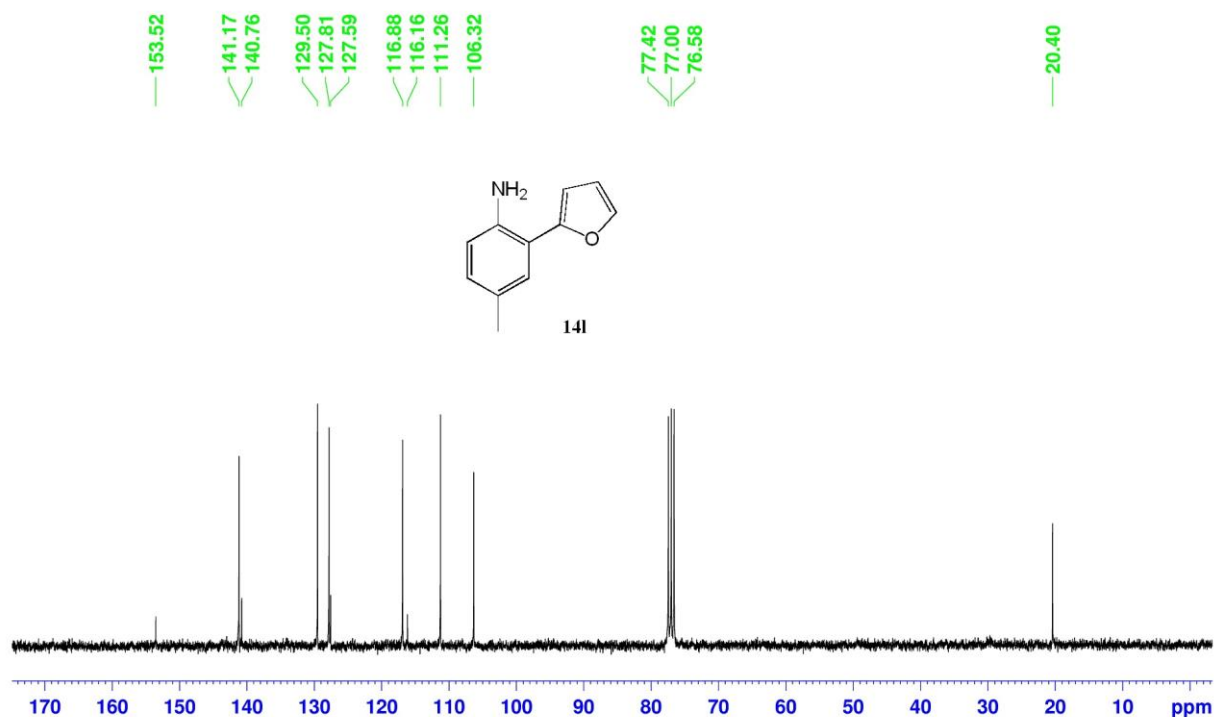

**5-methyl-3-(5-methylthiophen-2-yl)pyridin-2-amine (14m)**

$^1\text{H}$  NMR (300 MHz,  $\text{CDCl}_3$ )

MS-V-82 in  $\text{CDCl}_3$   
13/12/2012

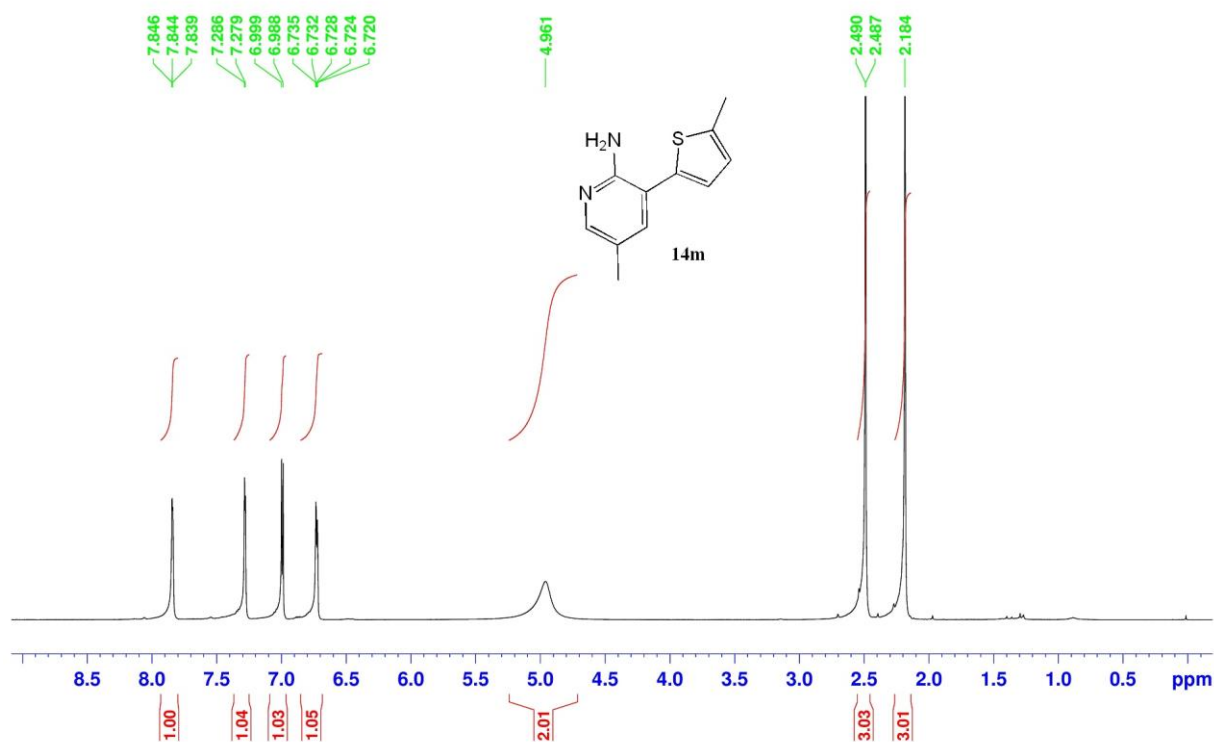

$^{13}\text{C}$  NMR (75 MHz,  $\text{CDCl}_3$ )

MS-V-82 C13 in  $\text{CDCl}_3$   
13/12/2012

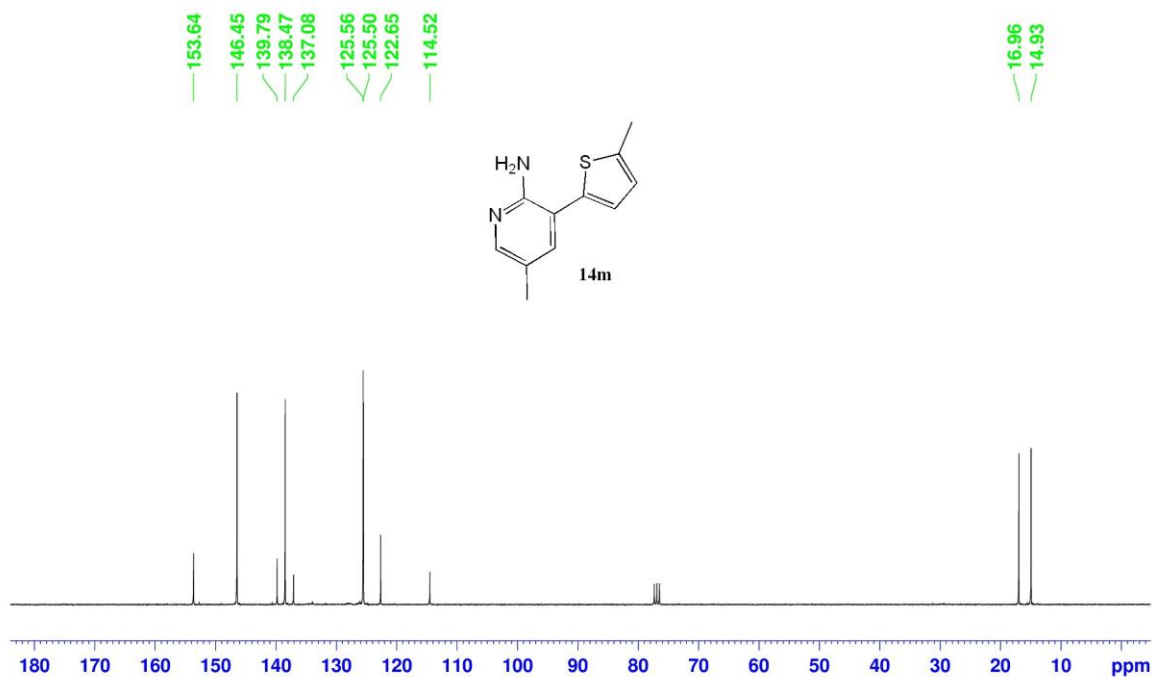

$N^5$ -(4-fluorophenyl)- $N^4$ -(2-(3-methyl-1H-pyrazol-5-yl)phenyl)-1H-imidazole-4,5-dicarboxamide (15b)

HRMS (ES+)

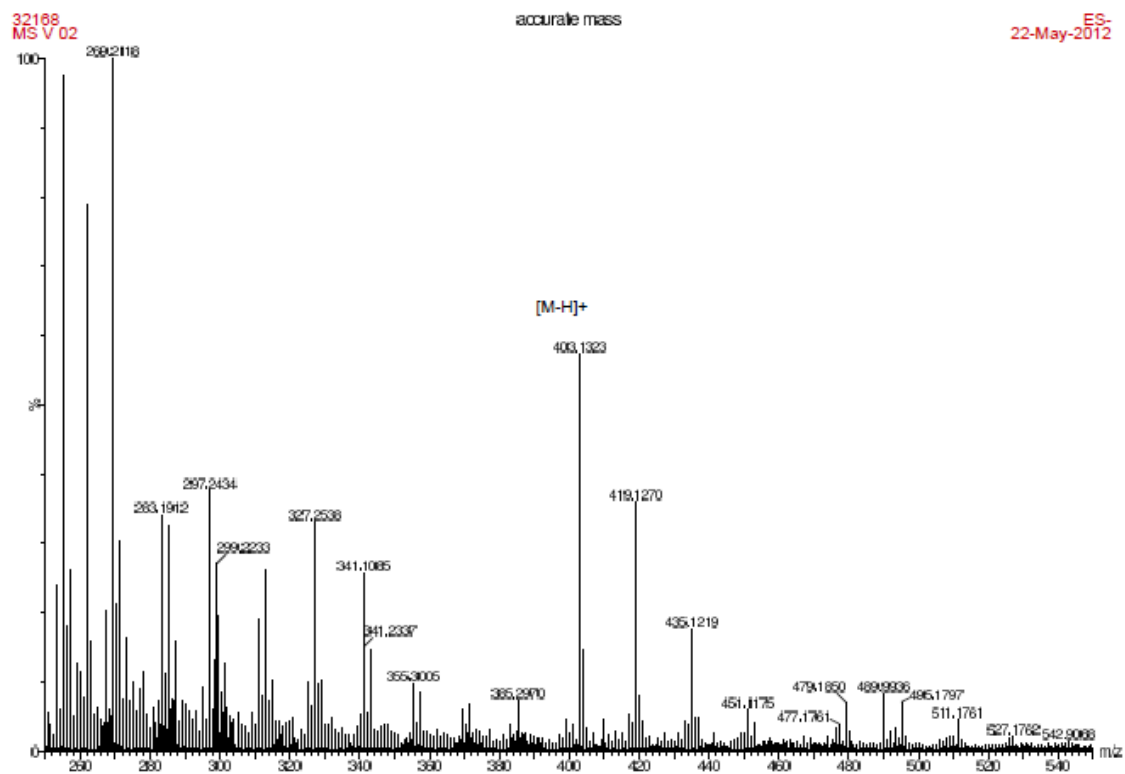



# <sup>1</sup>H NMR (300 MHz, DMSO)

MS-V-02 in DMSO  
proton spectrum

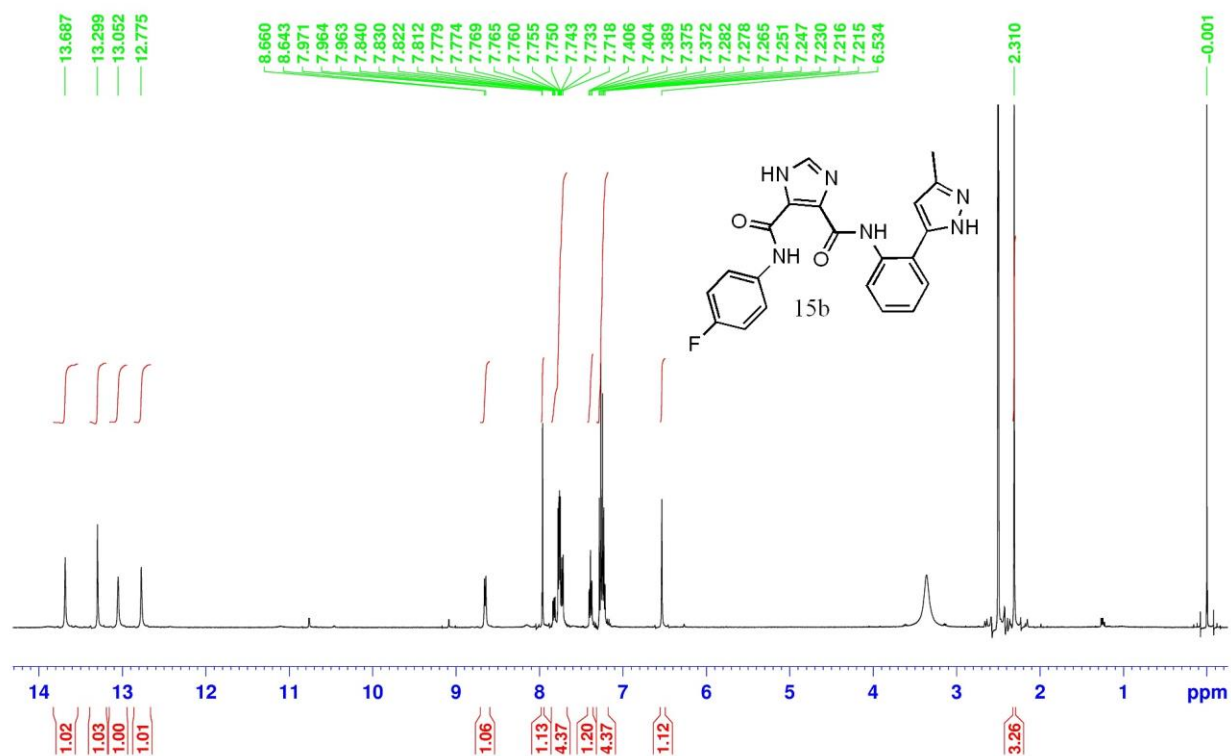

# <sup>13</sup>C NMR (75 MHz, DMSO)

MS-V-02 in DMSO  
temp = 25C  
13C  
1H decoupled

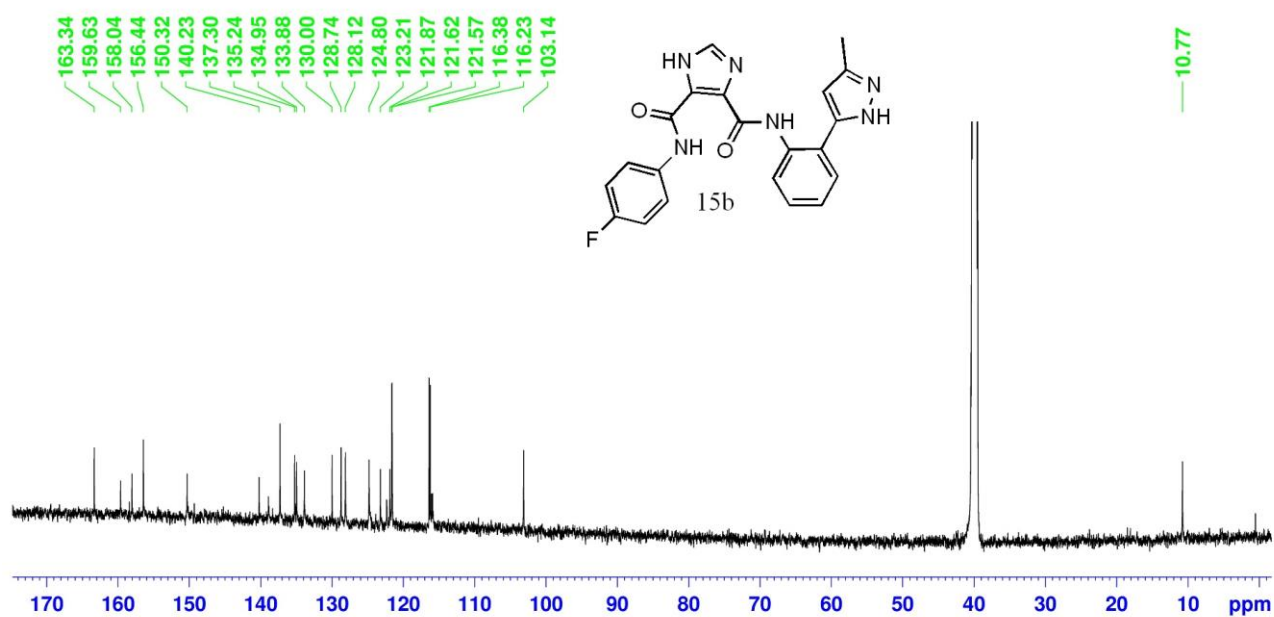

***N*<sup>5</sup>-(4-fluorophenyl)-*N*<sup>4</sup>-(2-(pyridin-4-yl)benzyl)-1*H*-imidazole-4,5-dicarboxamide (15c)**

HRMS (ES+)

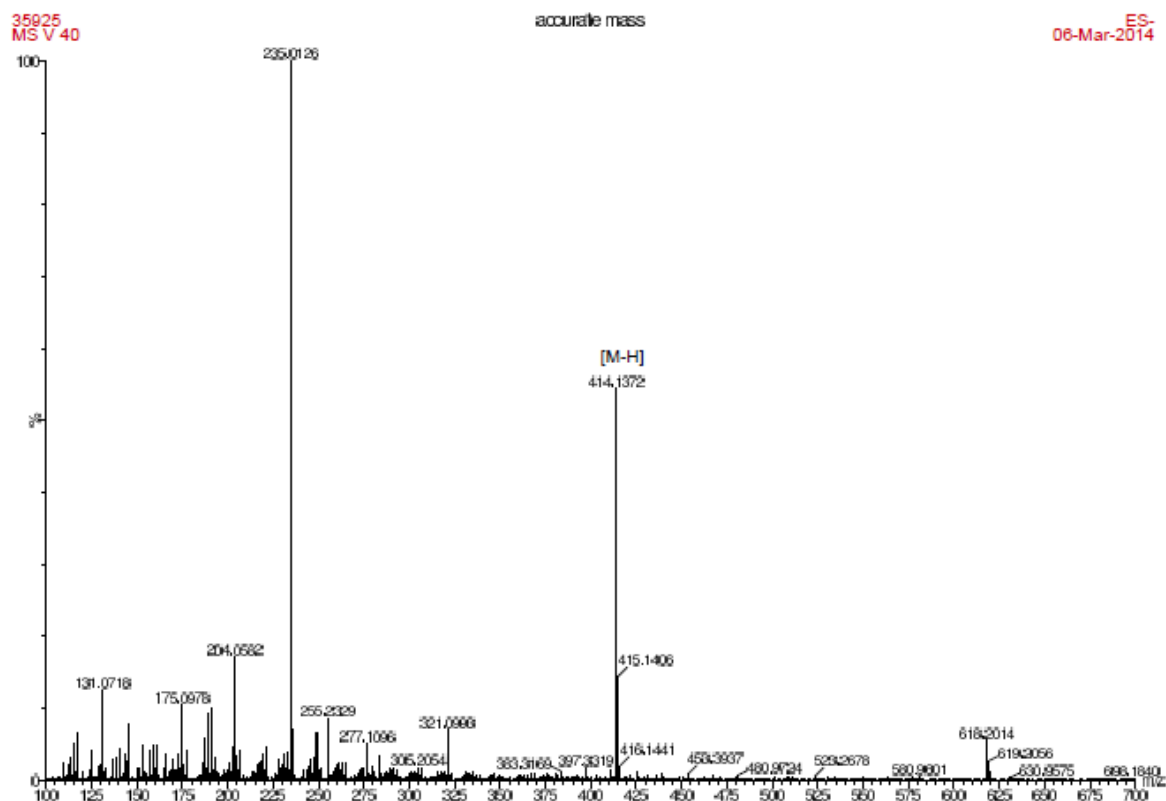

<sup>1</sup>H NMR (300 MHz, DMSO)

MS-V-40-600 in DMSO  
proton spectrum

temp=25C

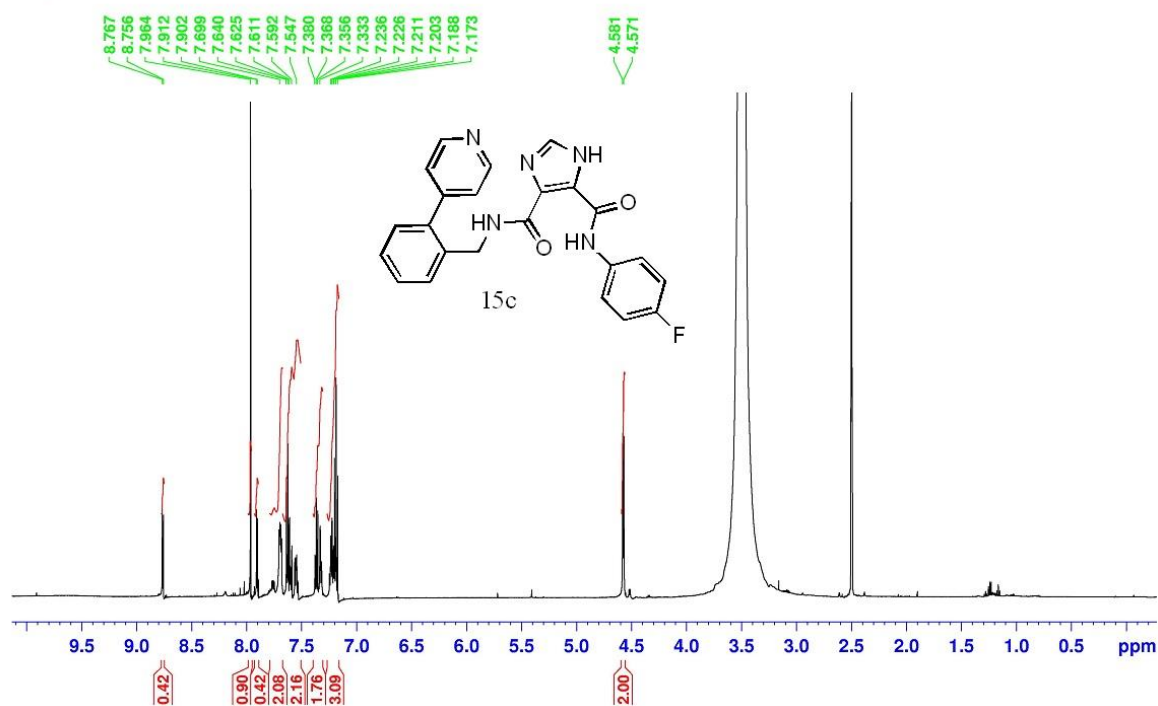

$^{13}\text{C}$  NMR (75 MHz, DMSO)

MS-V-40-600 in DMSO  
 $^{13}\text{C}$

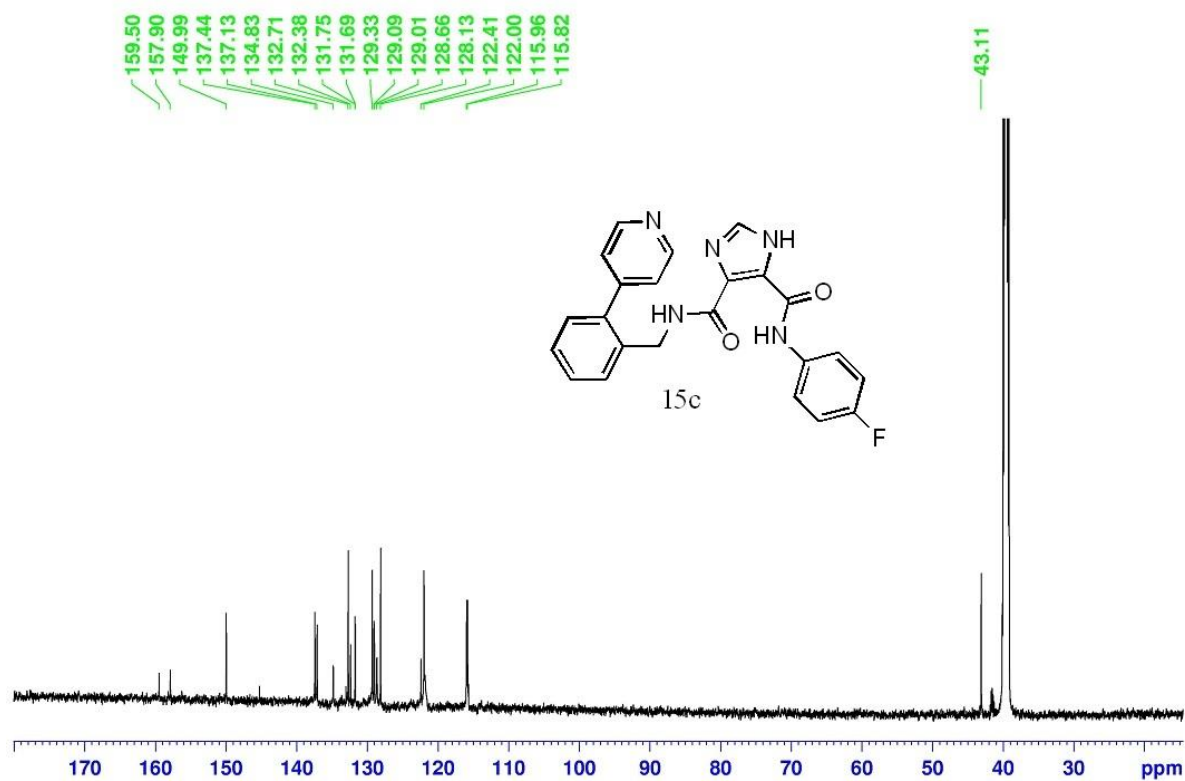

**$N^5$ -(4-fluorophenyl)- $N^4$ -(2-(thiophen-3-yl)benzyl)-1H-imidazole-4,5-dicarboxamide (15d)**

HRMS (ES+)

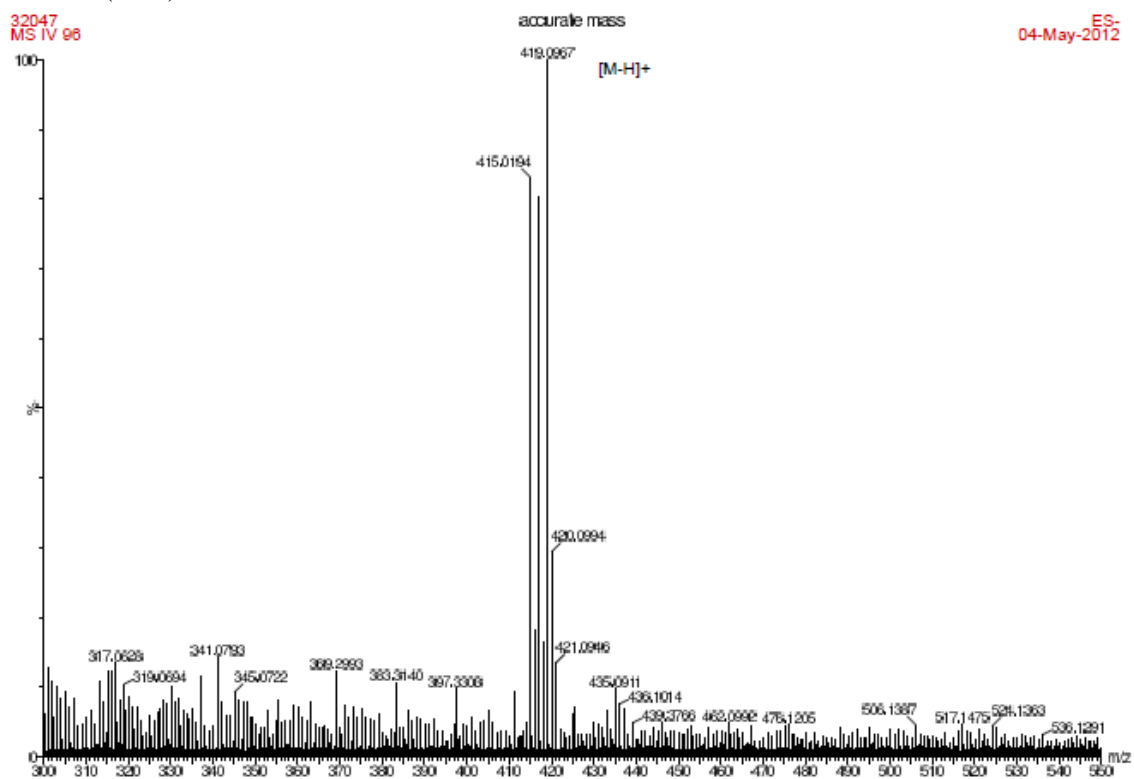

# <sup>1</sup>H NMR (300 MHz, DMSO)

MS-IV-96 in DMSO  
01/05/2012

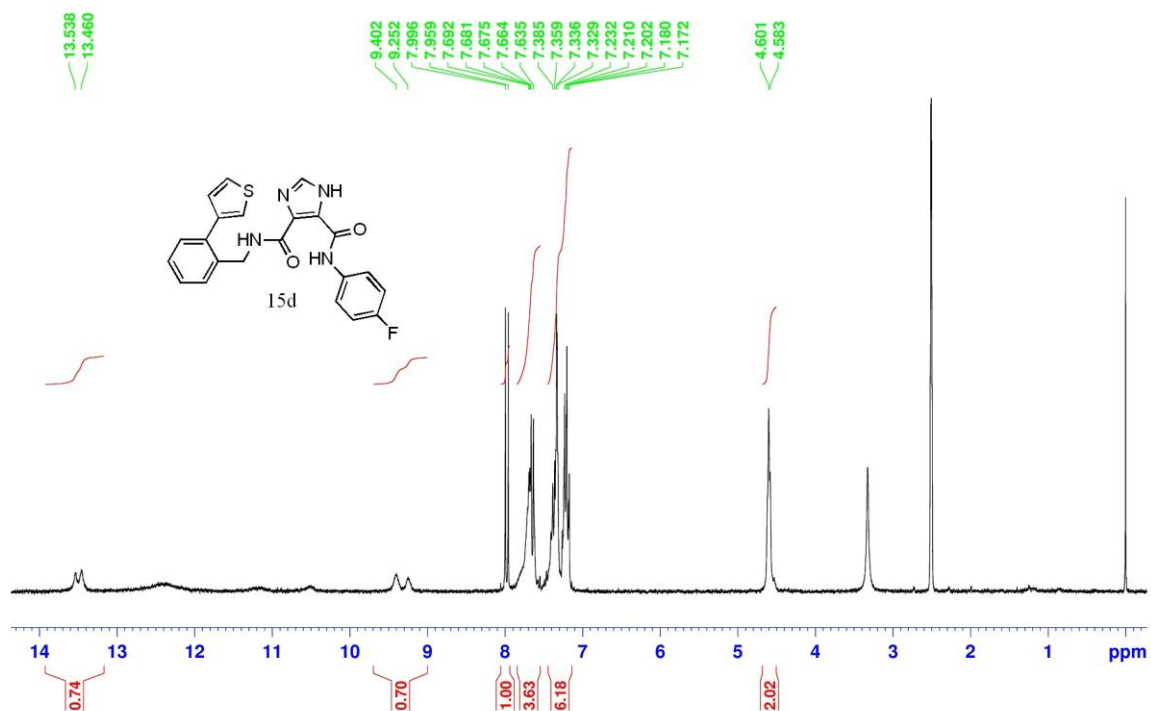

# <sup>13</sup>C NMR (75 MHz, DMSO)

MS-IV-96 in DMSO  
carbon spectrum

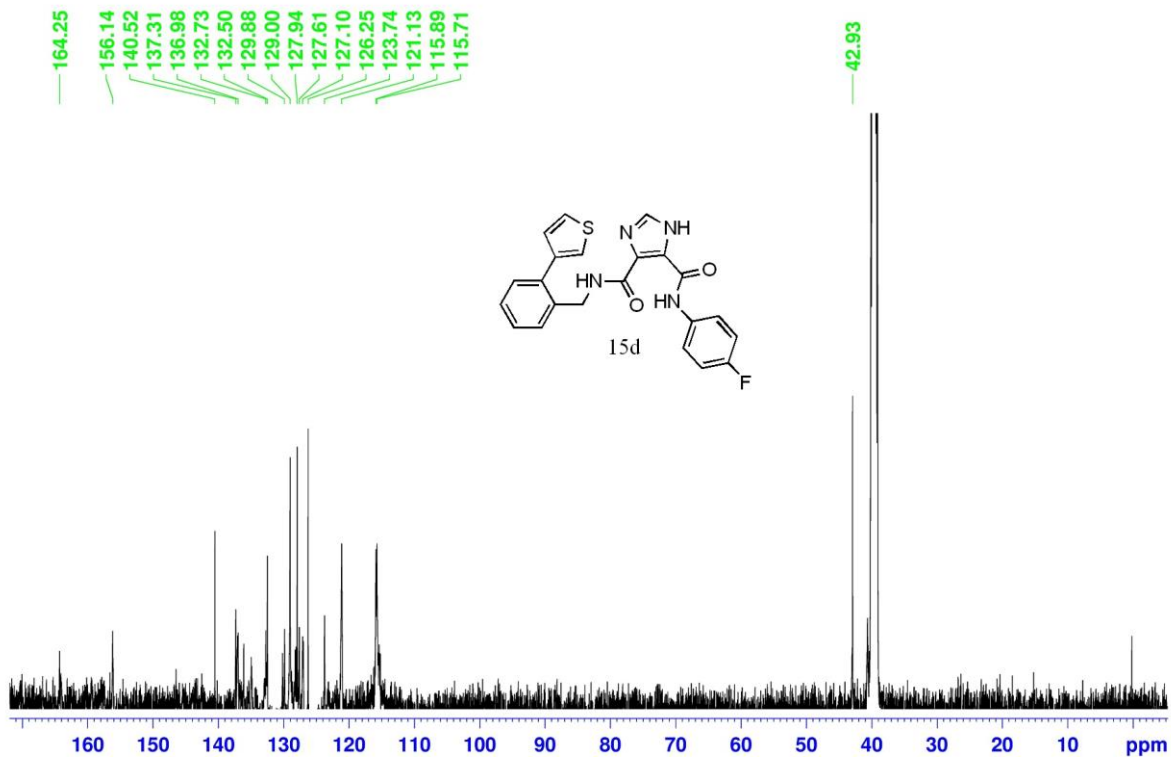

***N*<sup>5</sup>-(4-fluorophenyl)-*N*<sup>4</sup>-(4-(pyridin-3-yl)benzyl)-1*H*-imidazole-4,5-dicarboxamide (15e)**

HRMS (ES<sup>+</sup>)

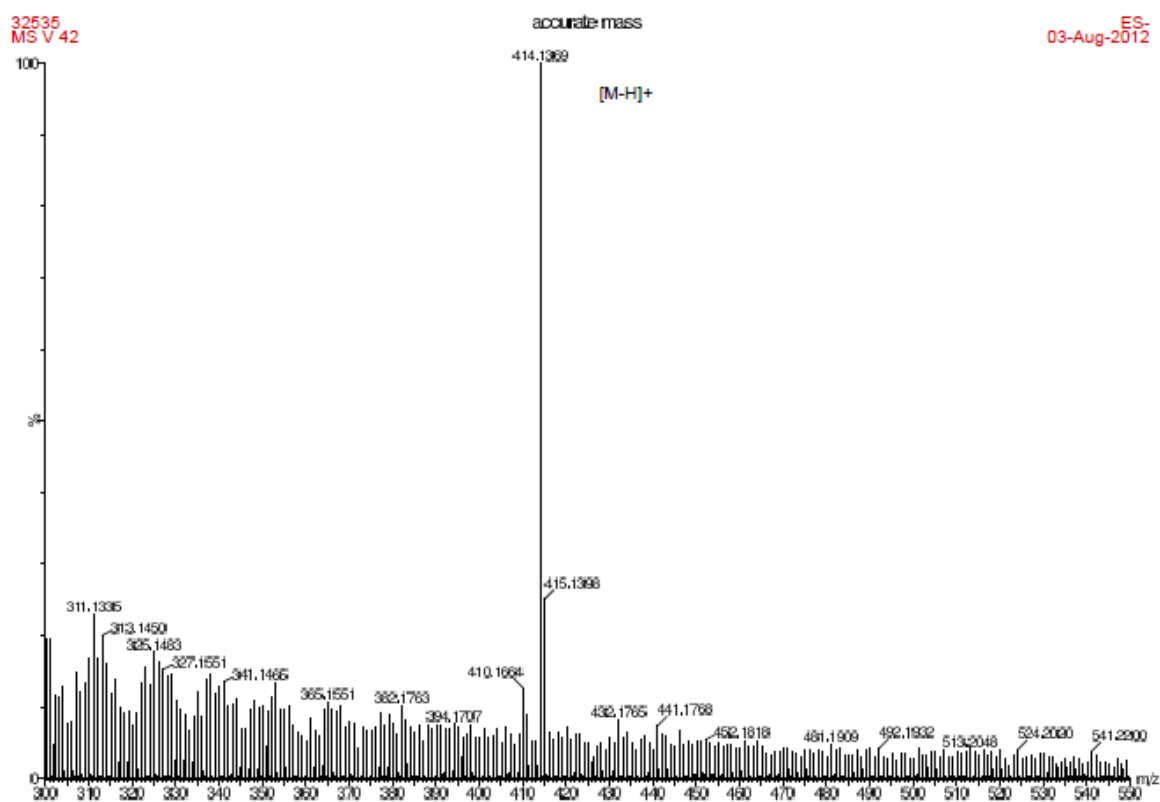

**<sup>1</sup>H NMR (300 MHz, DMSO)**

MS-V-42-600 in DMSO  
proton spectrum

temp=25C

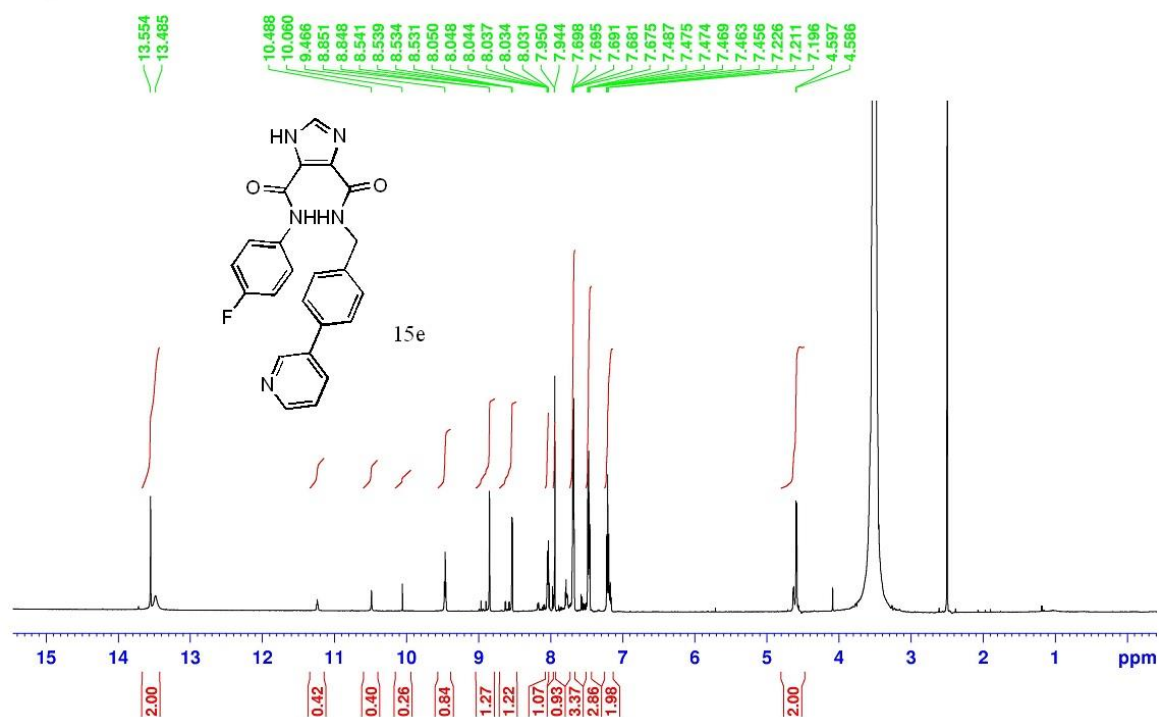

$^{13}\text{C}$  NMR (75 MHz, DMSO)

MS-V-42-600 in DMSO  
 $^{13}\text{C}$   
 $^1\text{H}$  decoupled

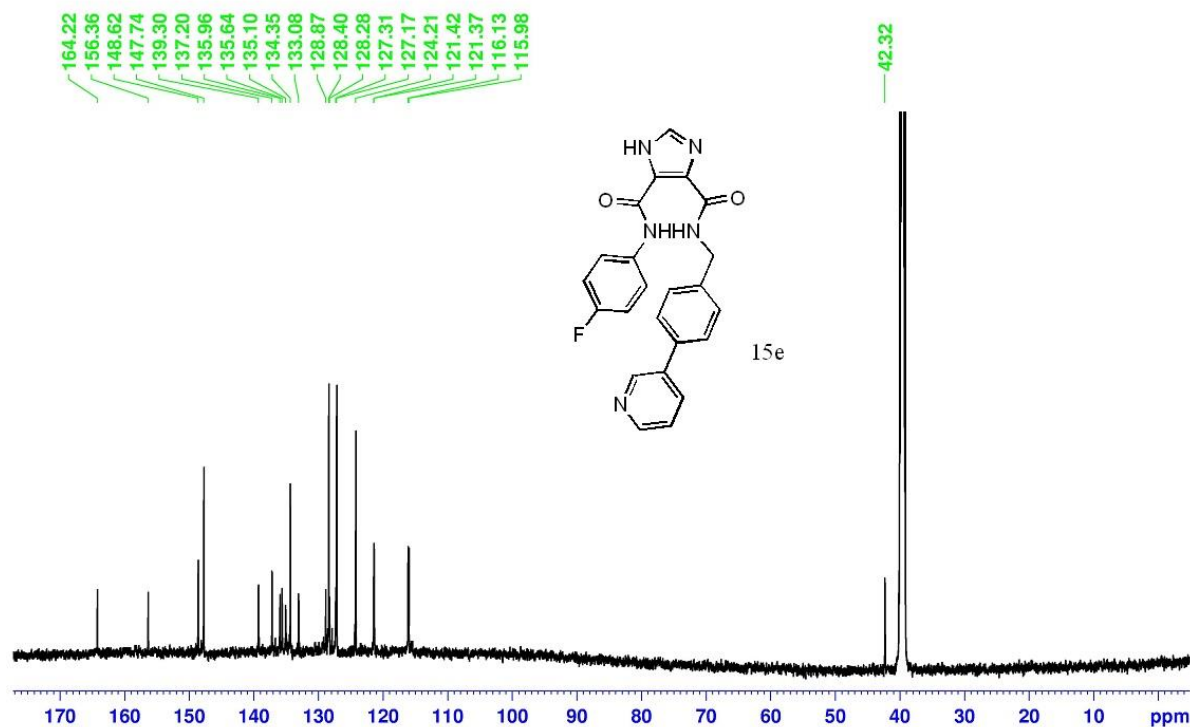

$N^5$ -(4-fluorophenyl)- $N^4$ -(4-(thiophen-3-yl)benzyl)-1H-imidazole-4,5-dicarboxamide (15f)

HRMS (ES<sup>+</sup>)

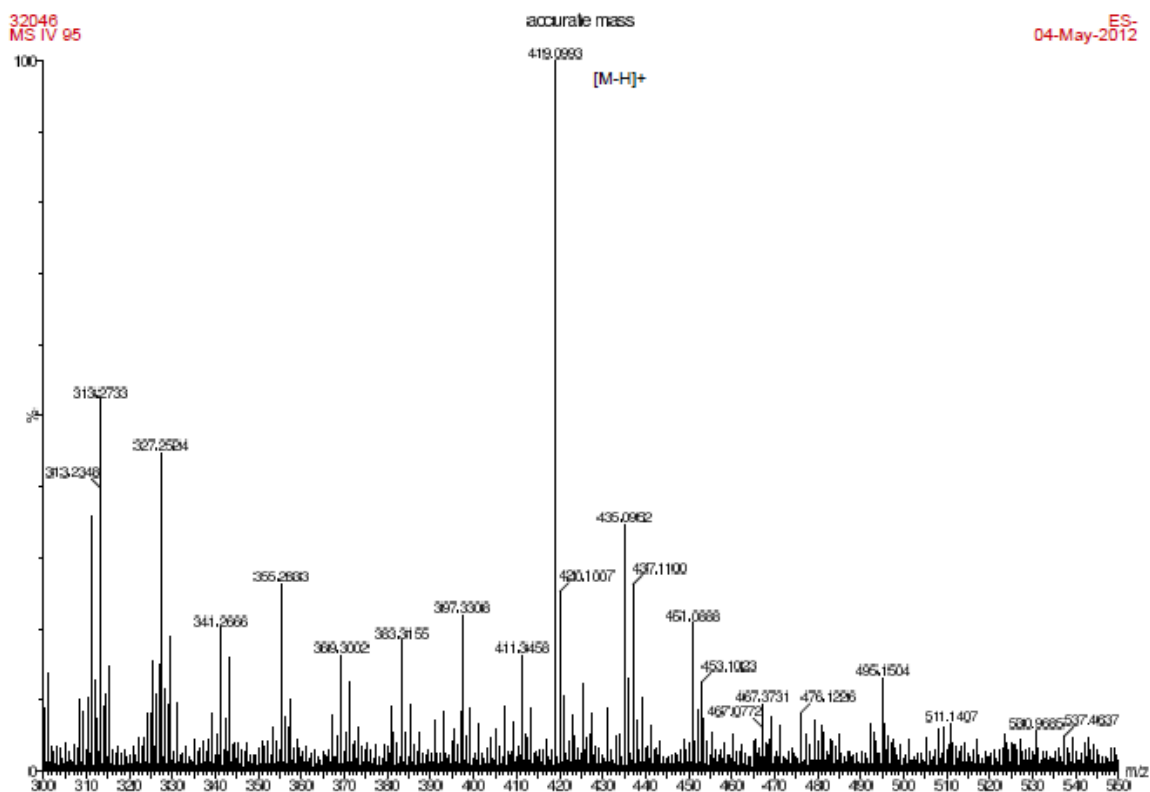

# <sup>1</sup>H NMR (300 MHz, DMSO)

MS-IV-95 in DMSO  
01/05/2012

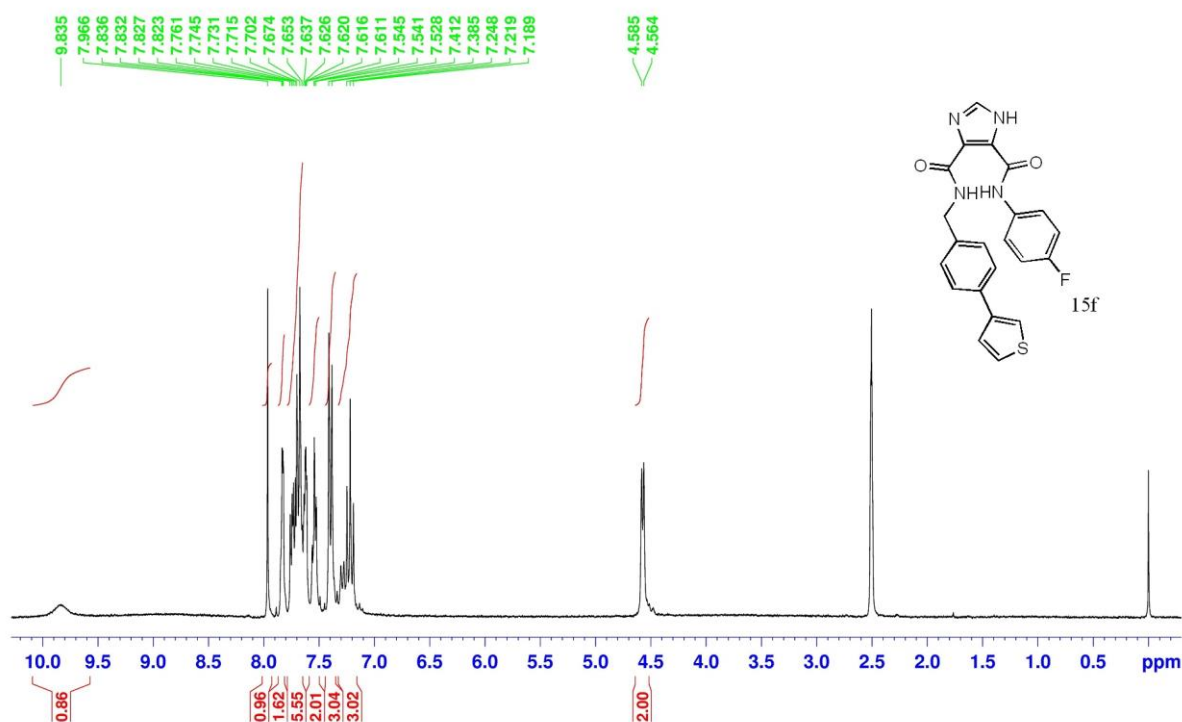

# <sup>13</sup>C NMR (75 MHz, DMSO)

MS-IV-95 C13 in DMSO  
01/05/2012

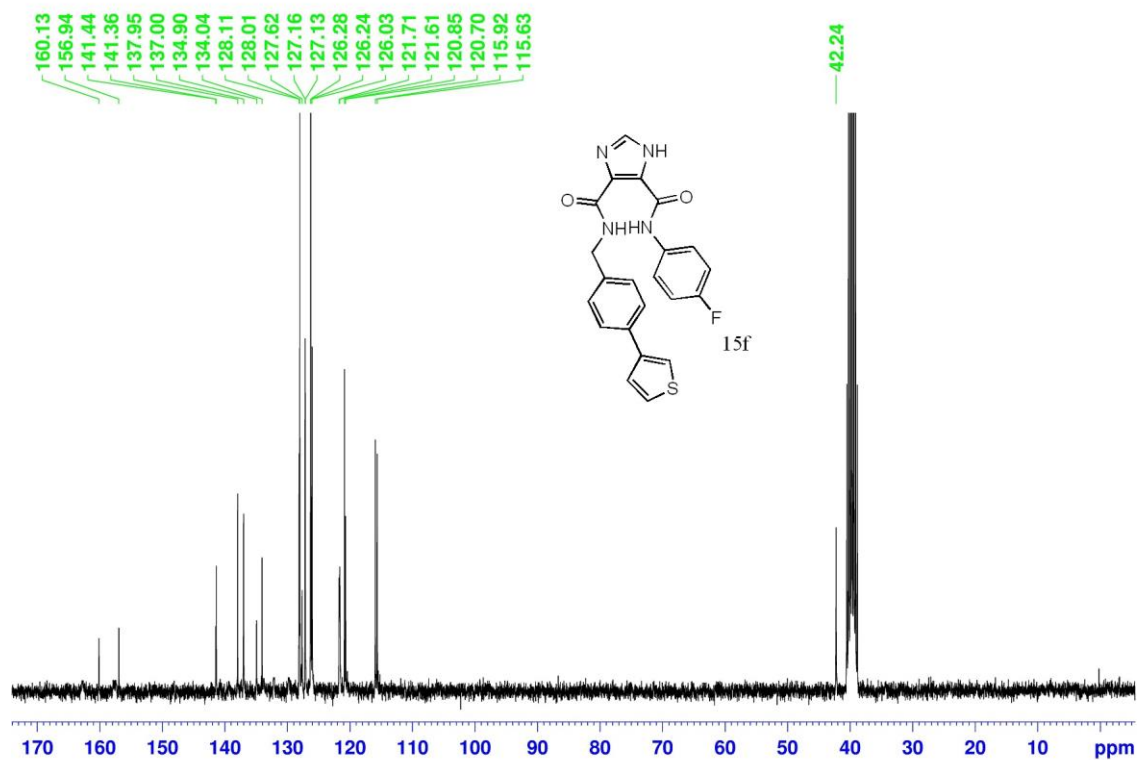

***N*<sup>5</sup>-(4-fluorophenyl)-*N*<sup>4</sup>-(4-(pyridin-4-yl)benzyl)-1*H*-imidazole-4,5-dicarboxamide (15g)**

HRMS (ES+)

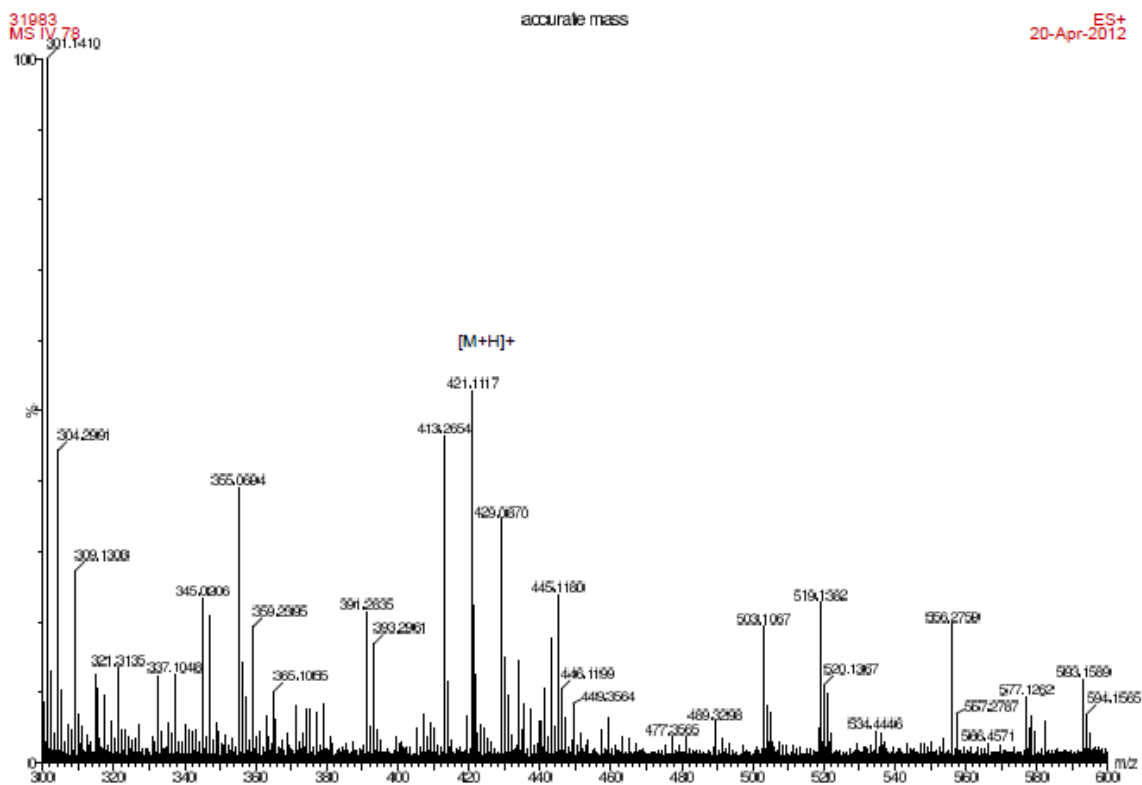

<sup>1</sup>H NMR (600 MHz, DMSO)

MS-V-41-600 in DMSO  
proton spectrum

temp=25C

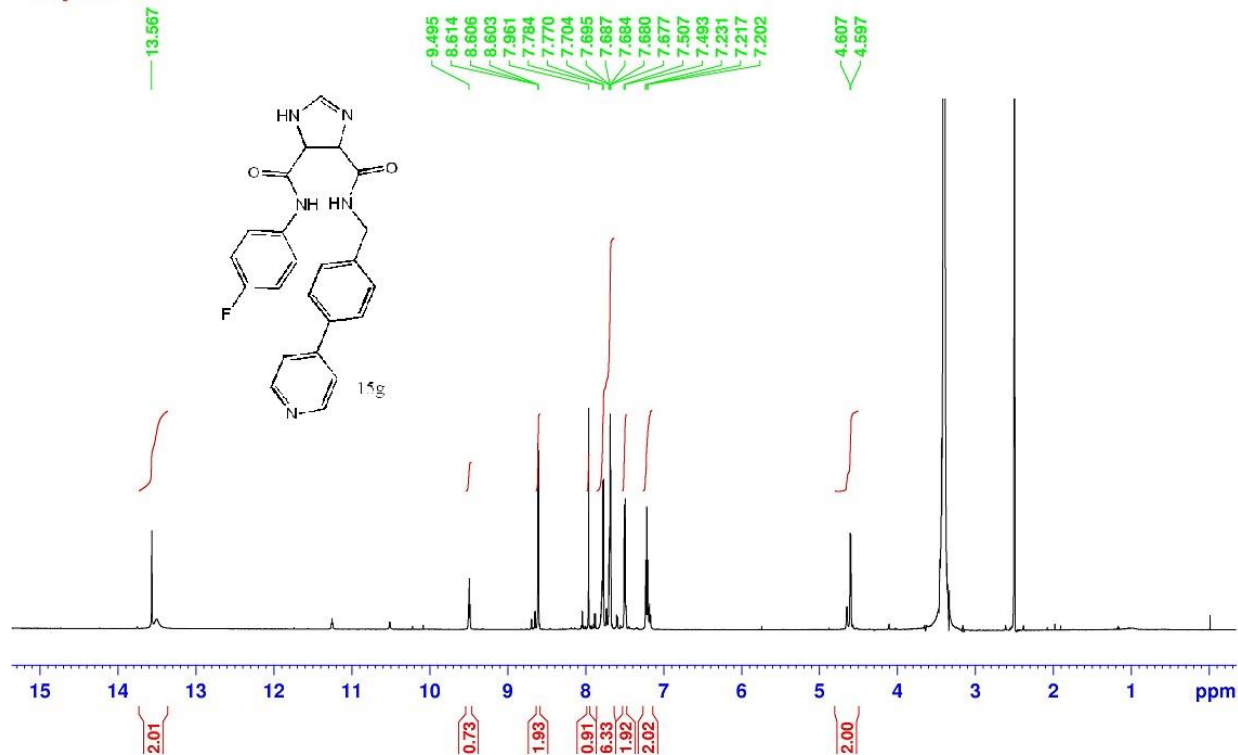



$^{13}\text{C}$  NMR (125 MHz, DMSO)

MS-V-41-600 in DMSO  
 $^{13}\text{C}$

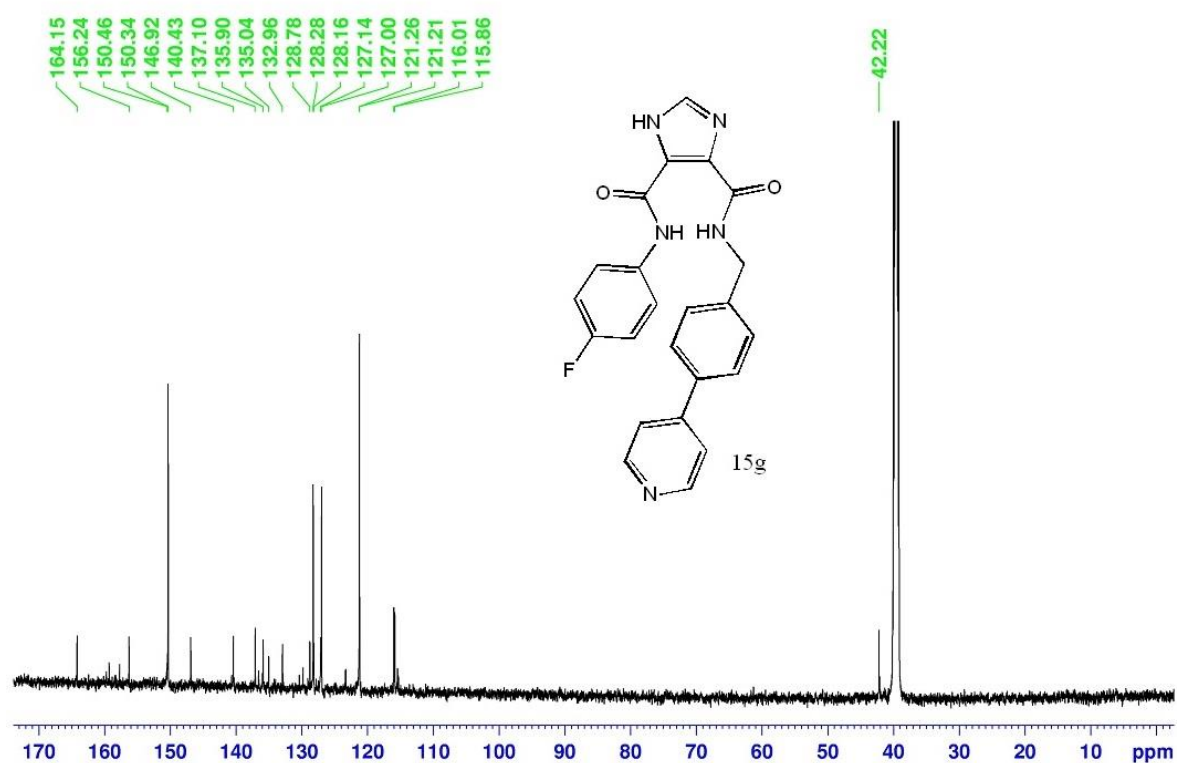

$N^5$ -(4-fluorophenyl)- $N^4$ -(4-methyl-2-(thiophen-3-yl)phenyl)-1H-imidazole-4,5-dicarboxamide (**15h**)

HRMS (ES+)

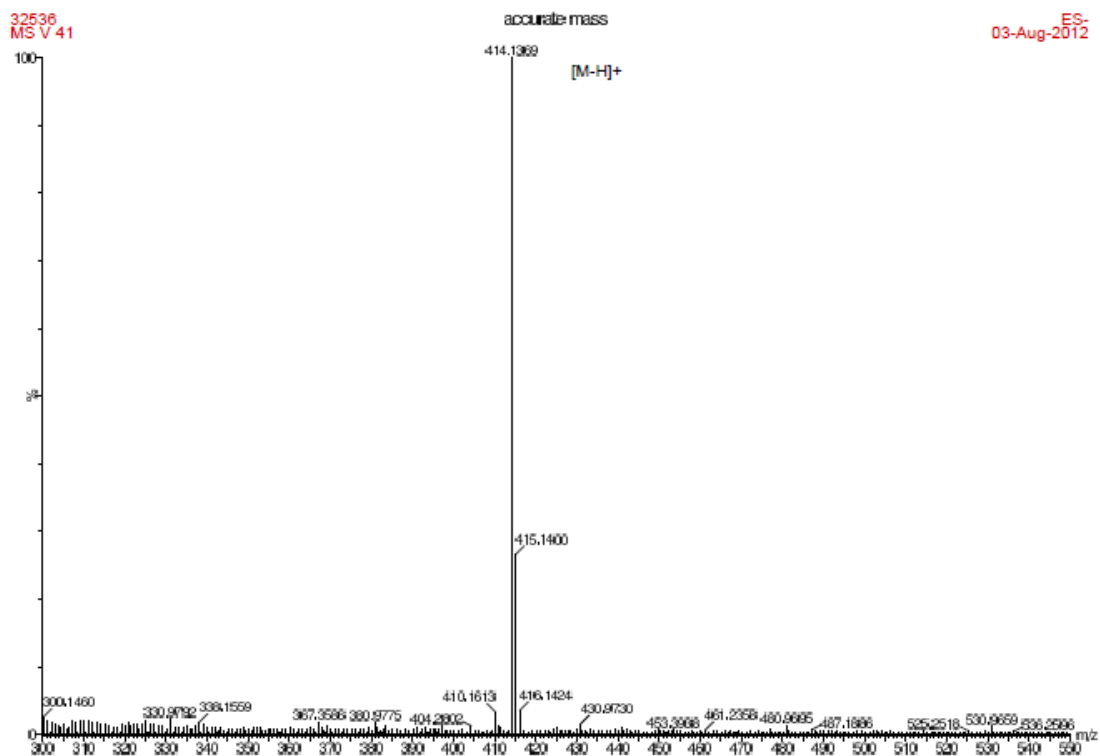

# <sup>1</sup>H NMR (500 MHz, DMSO)

MS-IV-78 in DMSO  
proton spectrum  
temp=25C

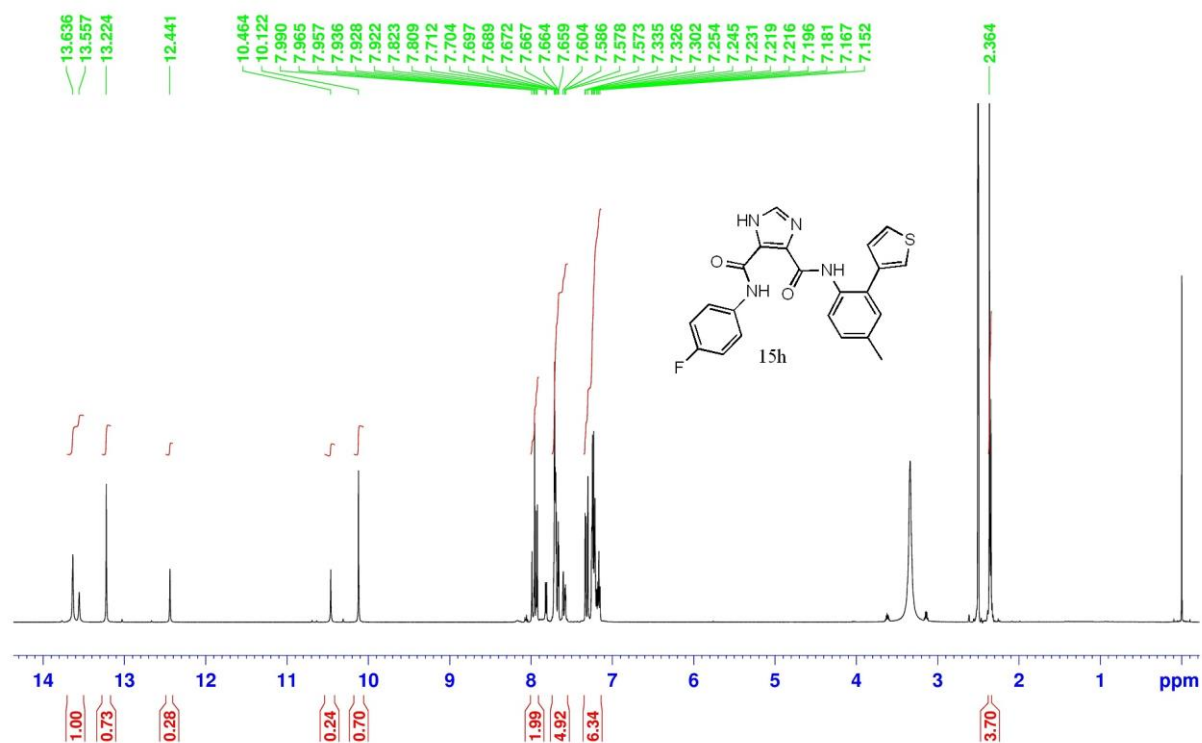

# <sup>13</sup>C NMR (125 MHz, DMSO)

MS-IV-78 in DMSO  
temp = 20C  
13C

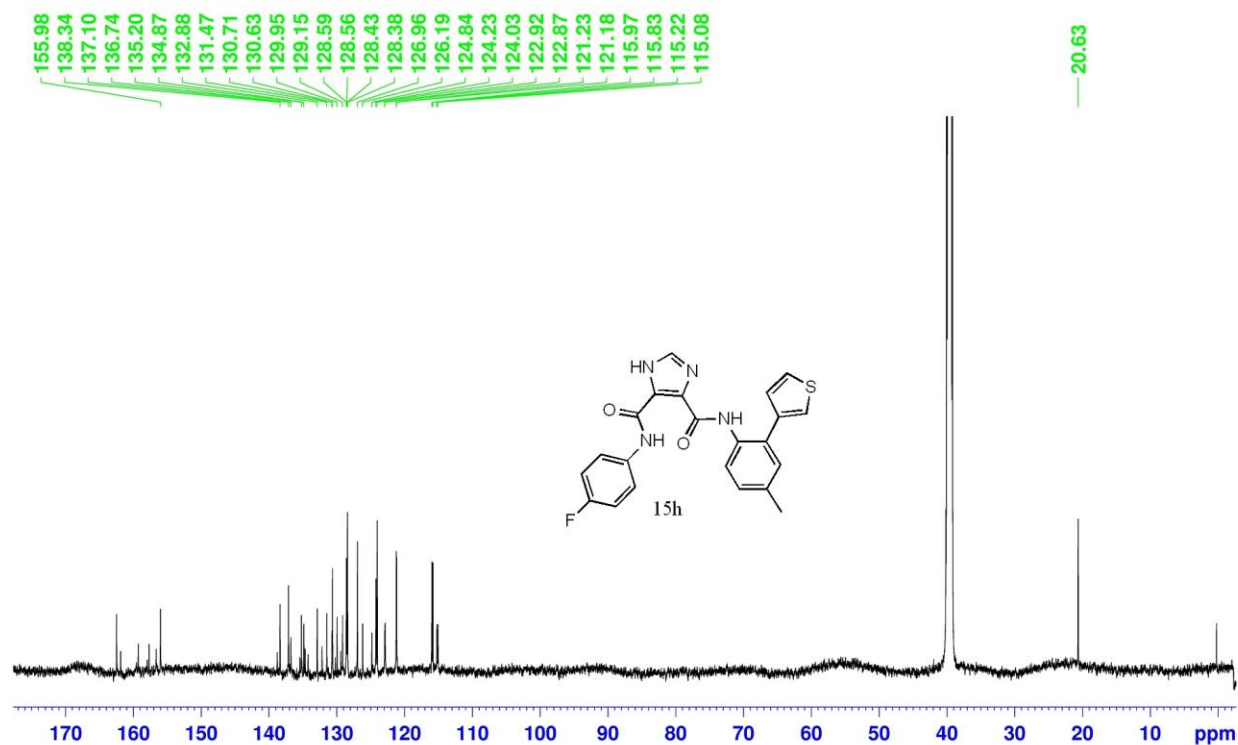

***N*<sup>5</sup>-(4-fluorophenyl)-*N*<sup>4</sup>-(2-(furan-2-yl)-4-methylphenyl)-1*H*-imidazole-4,5-dicarboxamide (**15i**)**

HRMS (ES+)

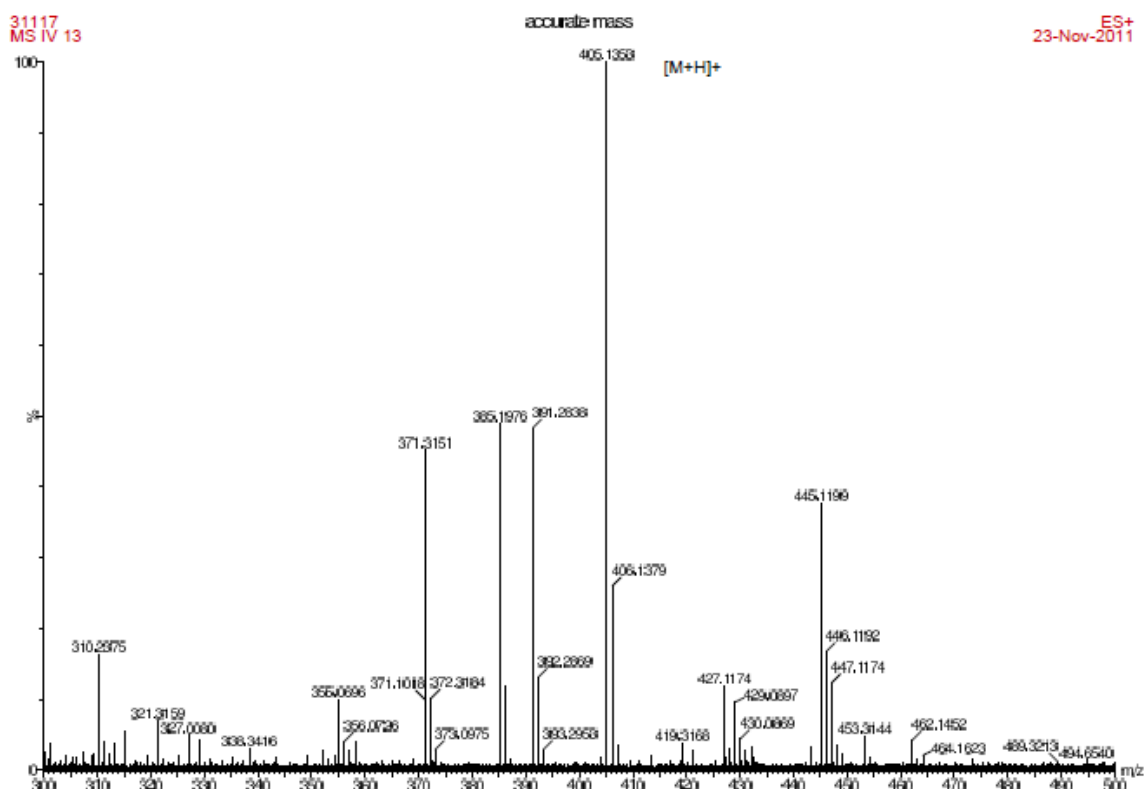

<sup>1</sup>H NMR (300 MHz, DMSO)

MS-IV-13 in DMSO  
08/10/2011

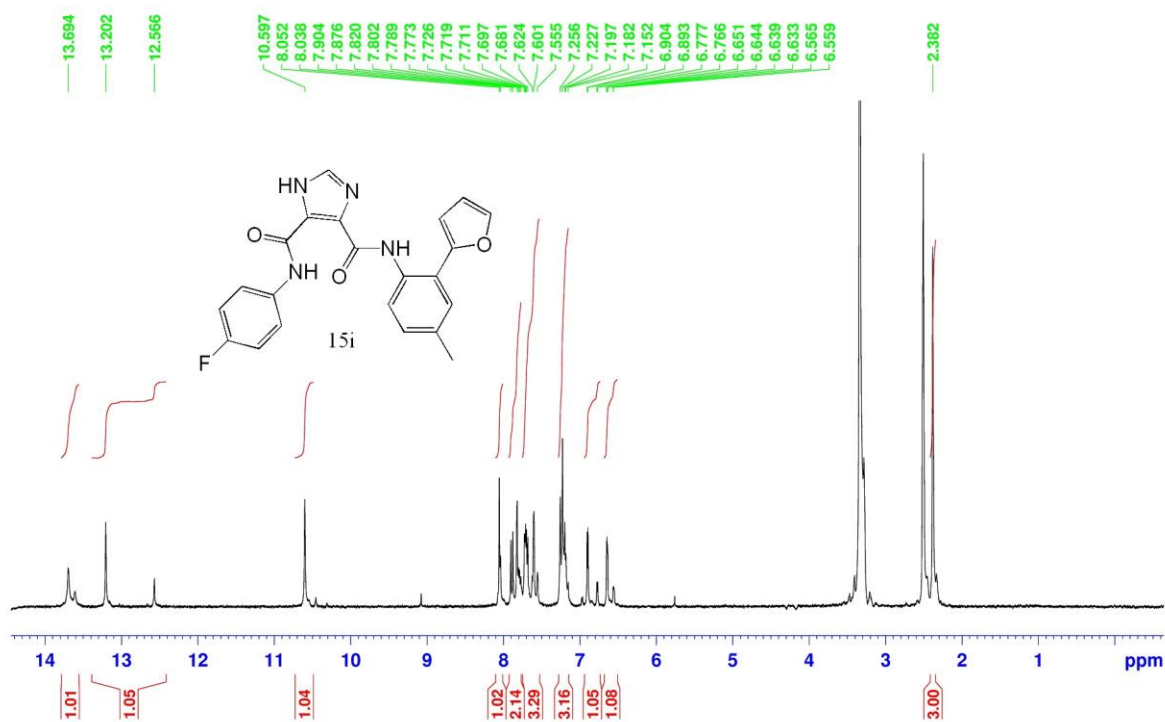

***N*<sup>4</sup>-(4-methyl-2-(thiophen-3-yl)phenyl)-*N*<sup>5</sup>-phenyl-1H-imidazole-4,5-dicarboxamide (15j)**

HRMS (ES<sup>+</sup>)

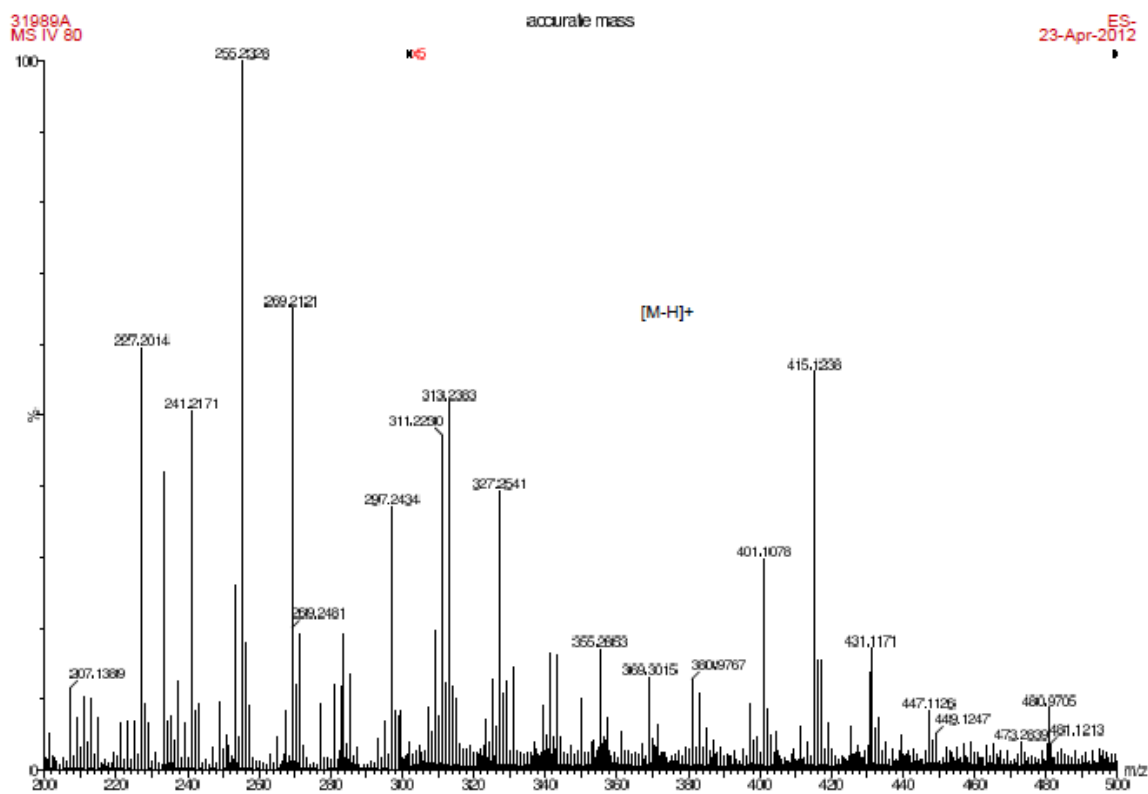

<sup>1</sup>H NMR (500 MHz, DMSO)

MS-IV-80 in DMSO  
proton spectrum  
temp=25C

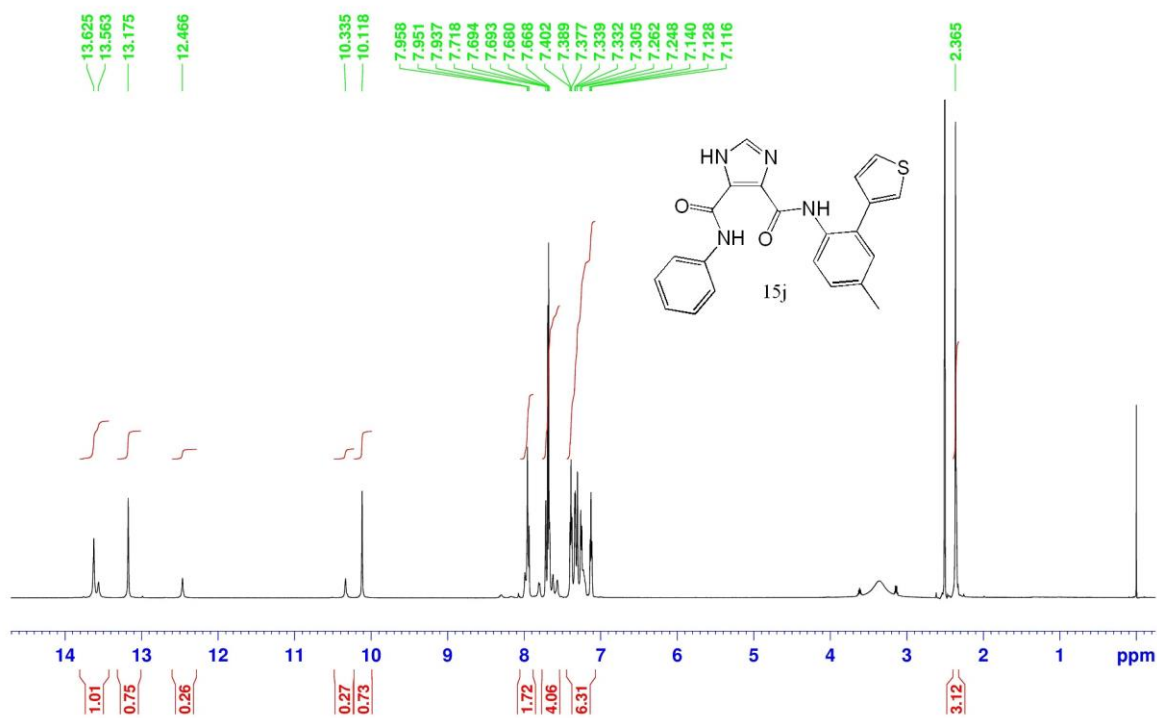

$^{13}\text{C}$  NMR (125 MHz, DMSO)

MS-IV-80 in DMSO  
proton spectrum  
temp=25C

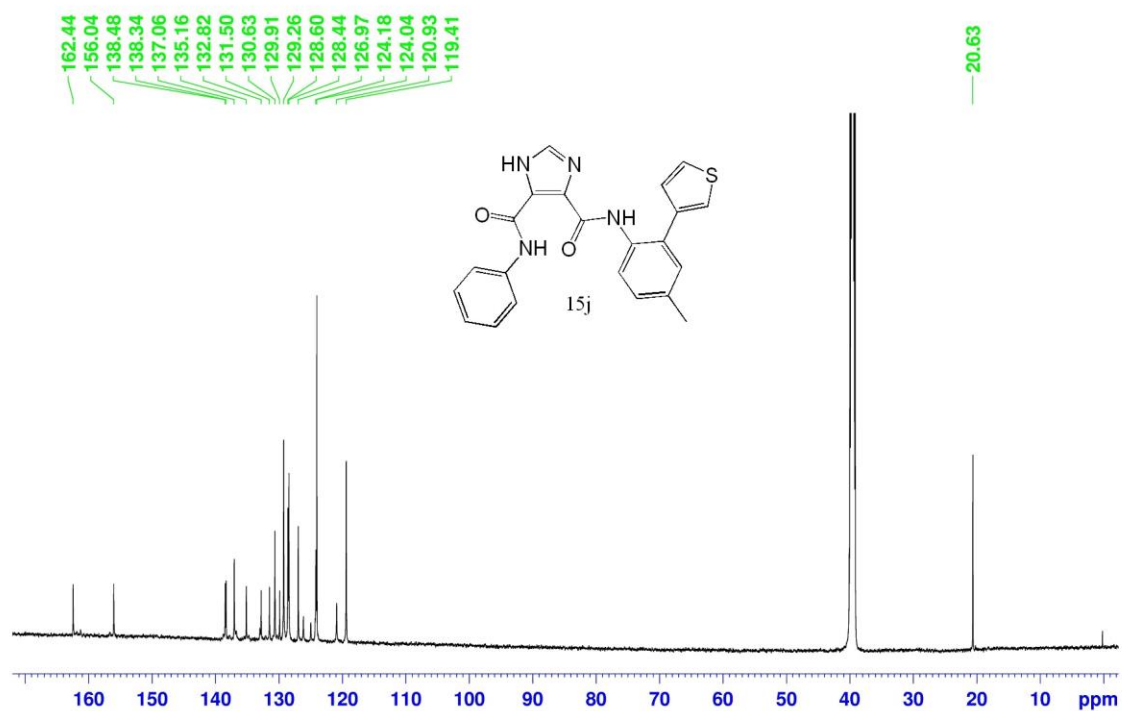

**$N^4$ -(4-methyl-2-(thiophen-3-yl)phenyl)- $N^5$ -(p-tolyl)-1H-imidazole-4,5-dicarboxamide (15k)**

HRMS (ES+)

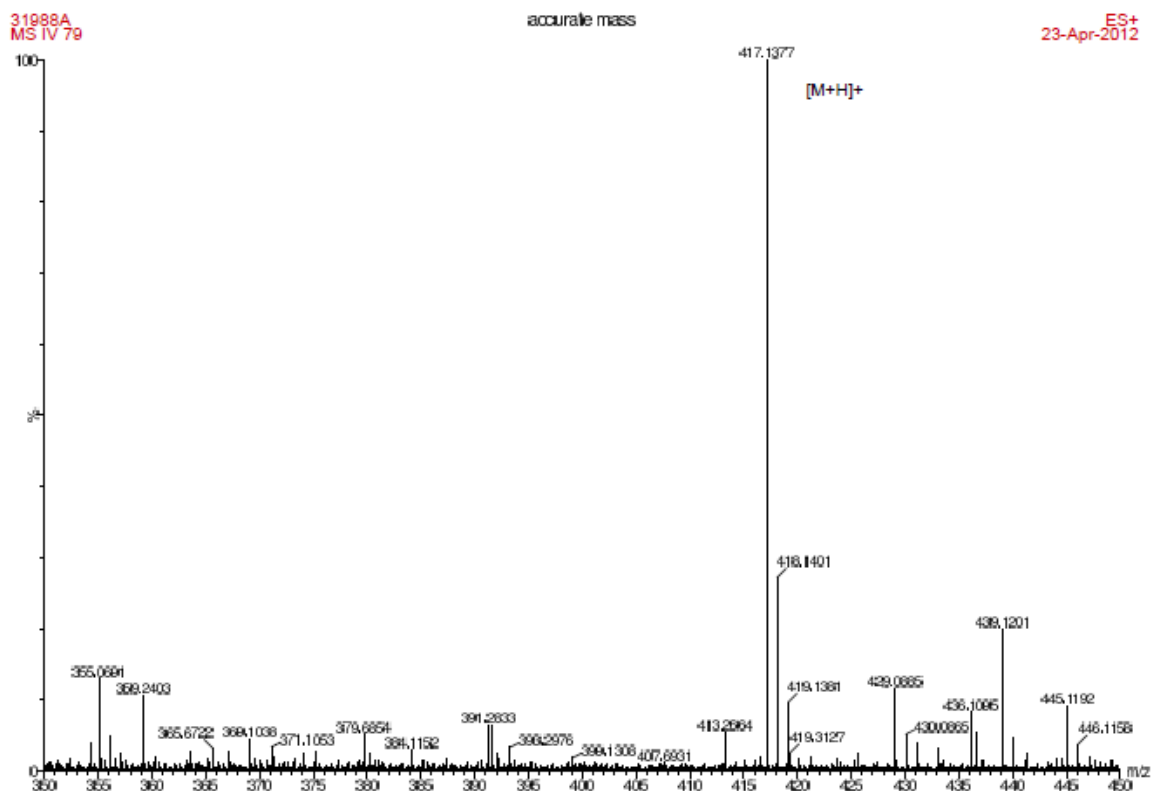

# <sup>1</sup>H NMR (500 MHz, DMSO)

MS-IV-79 in DMSO  
proton spectrum  
temp=25C

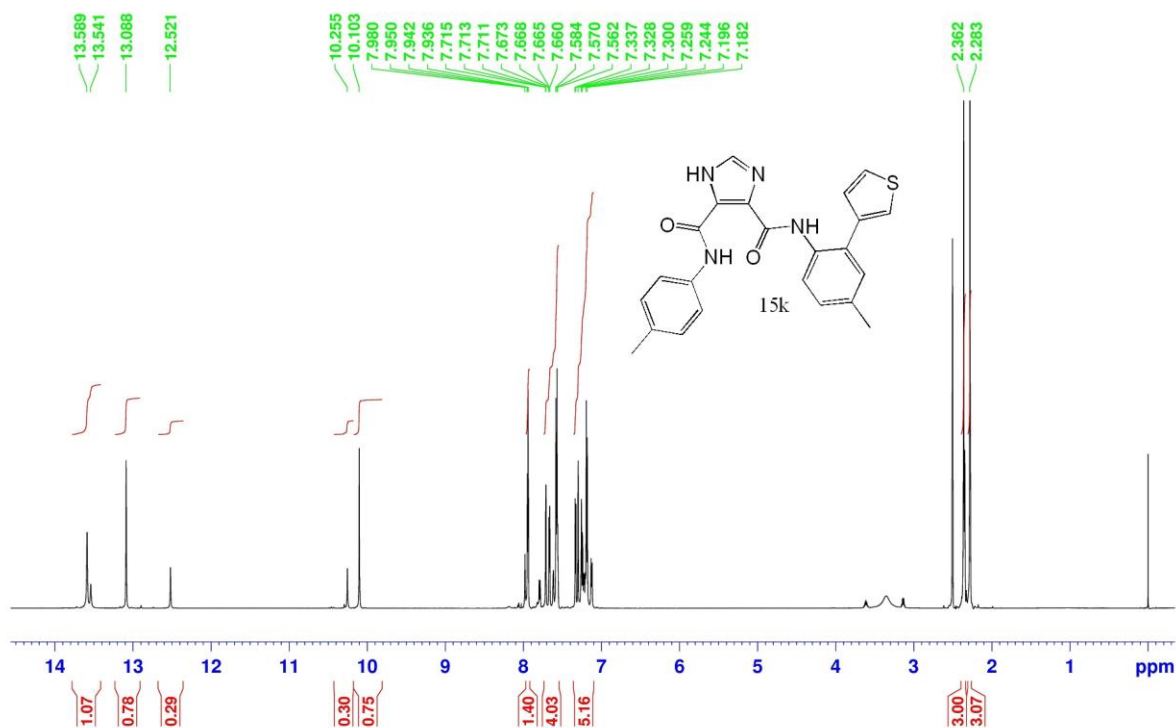

# <sup>13</sup>C NMR (125 MHz, DMSO)

MS-IV-79 in DMSO  
temp = 20C  
13C  
1H decoupled

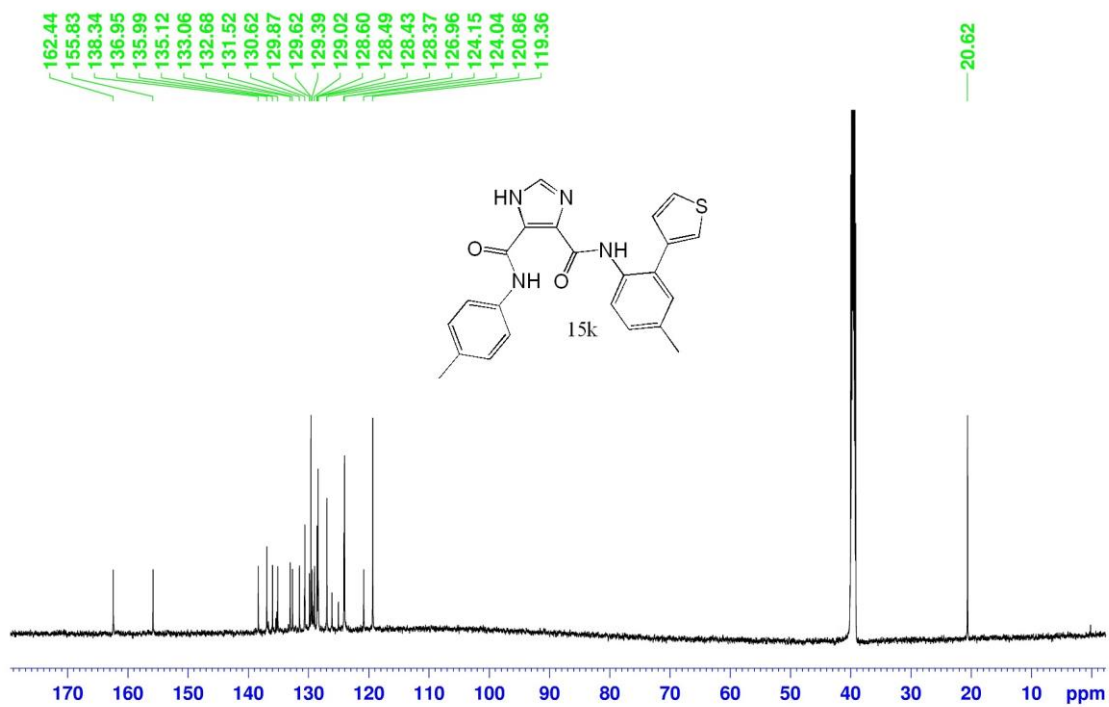

***N*<sup>4</sup>-(2-(furan-2-yl)-4-methylphenyl)-*N*<sup>5</sup>-(*p*-tolyl)-1*H*-imidazole-4,5-dicarboxamide (151)**

HRMS (ES<sup>+</sup>)

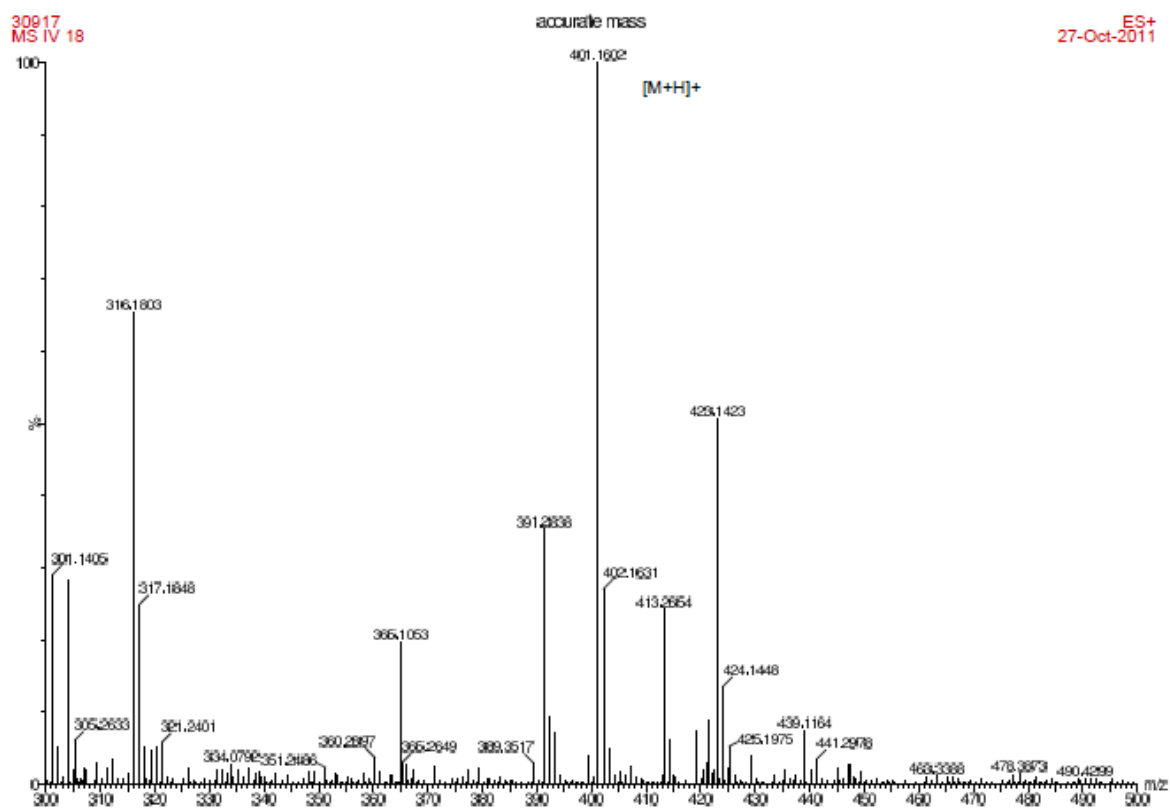

<sup>1</sup>H NMR (600 MHz, DMSO)

MS-IV-18-600 in DMSO  
proton spectrum

temp=25C

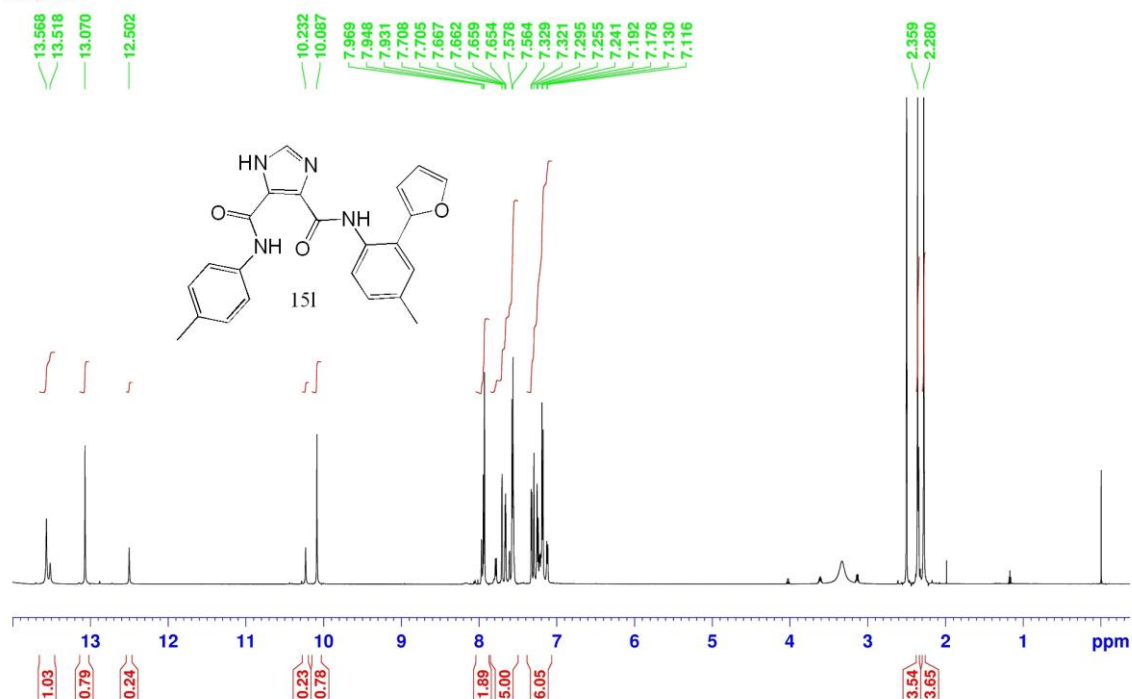

<sup>13</sup>C NMR (150 MHz, DMSO)

MS-IV-18-600 in DMSO  
13C  
1H decoupled

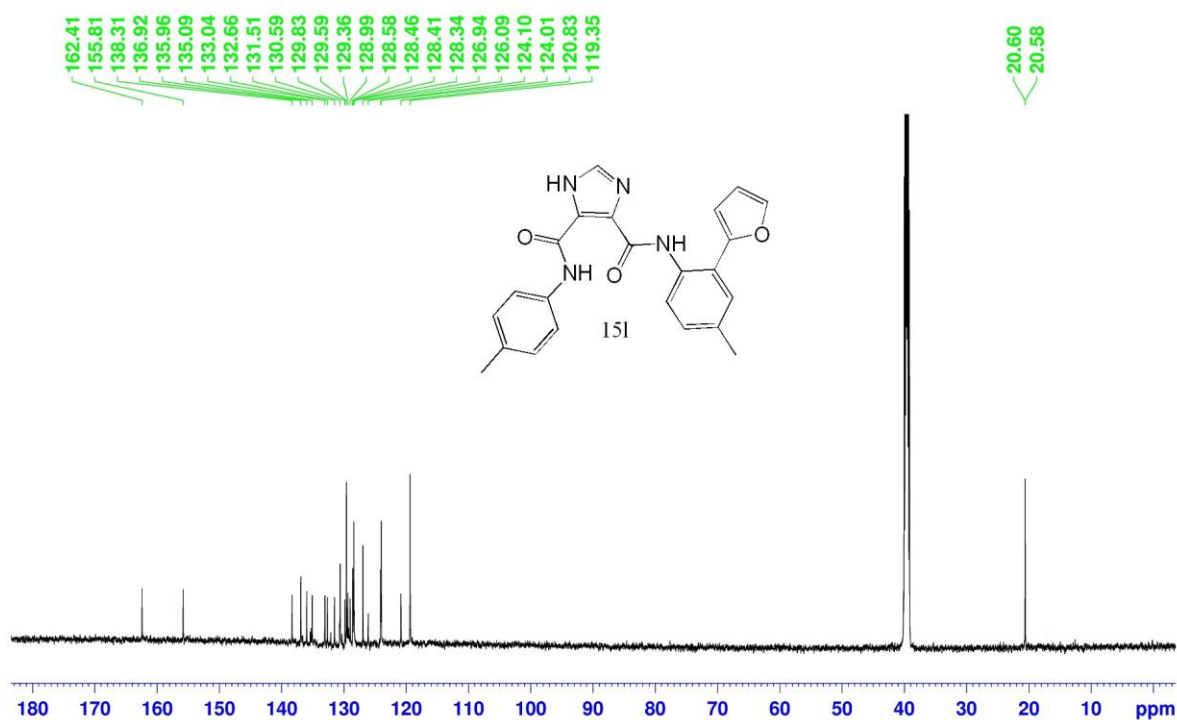

***N*<sup>5</sup>-benzyl-*N*<sup>4</sup>-(2-(furan-2-yl)-4-methylphenyl)-1*H*-imidazole-4,5-dicarboxamide (15m)**

HRMS (ES+)

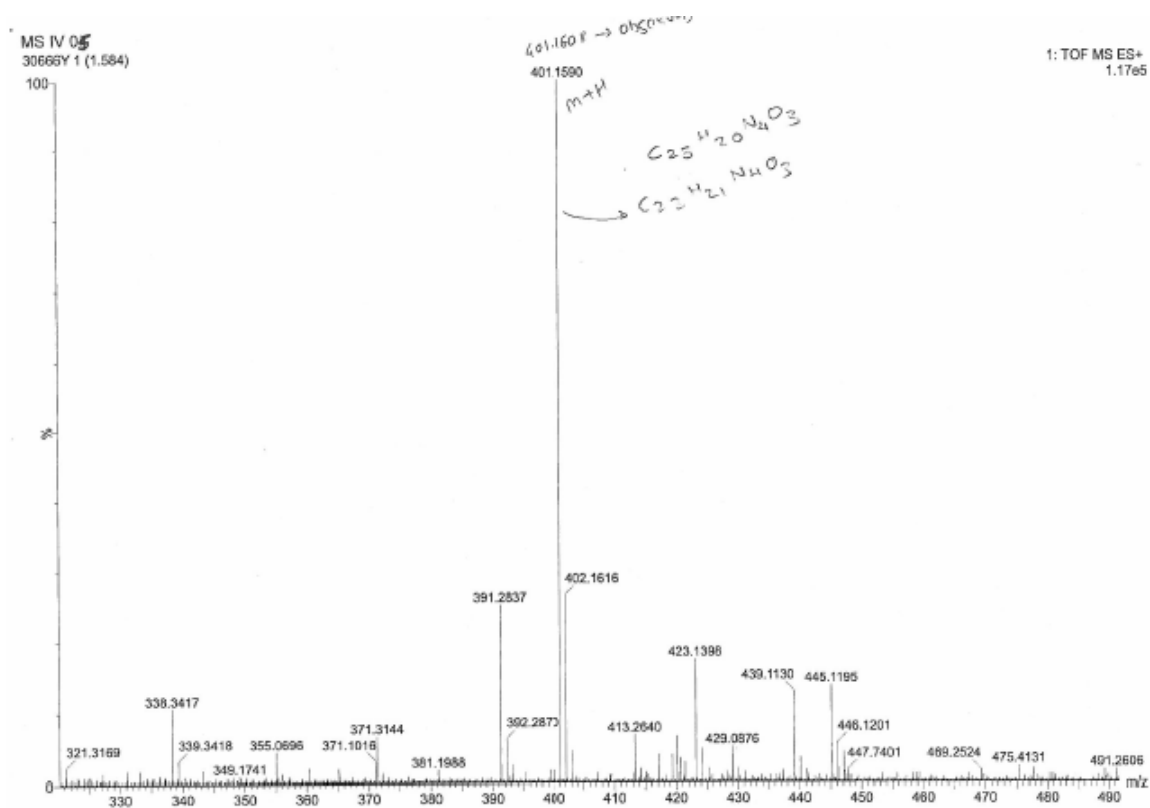



# $^1\text{H}$ NMR (300 MHz, $\text{CDCl}_3$ )

MS-IV-05 in  $\text{CDCl}_3$   
21/09/2011

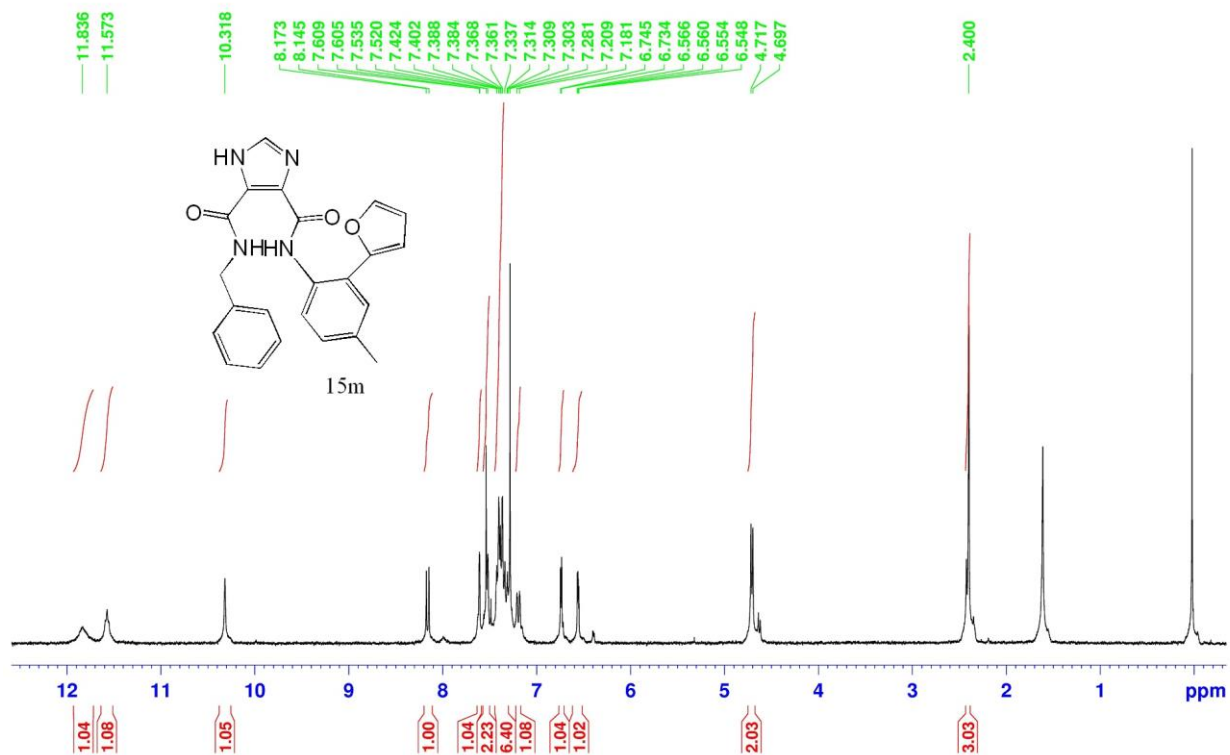

# $^{13}\text{C}$ NMR (75 MHz, $\text{CDCl}_3$ )

MS-IV-05 C13 in  $\text{CDCl}_3$   
21/09/2011

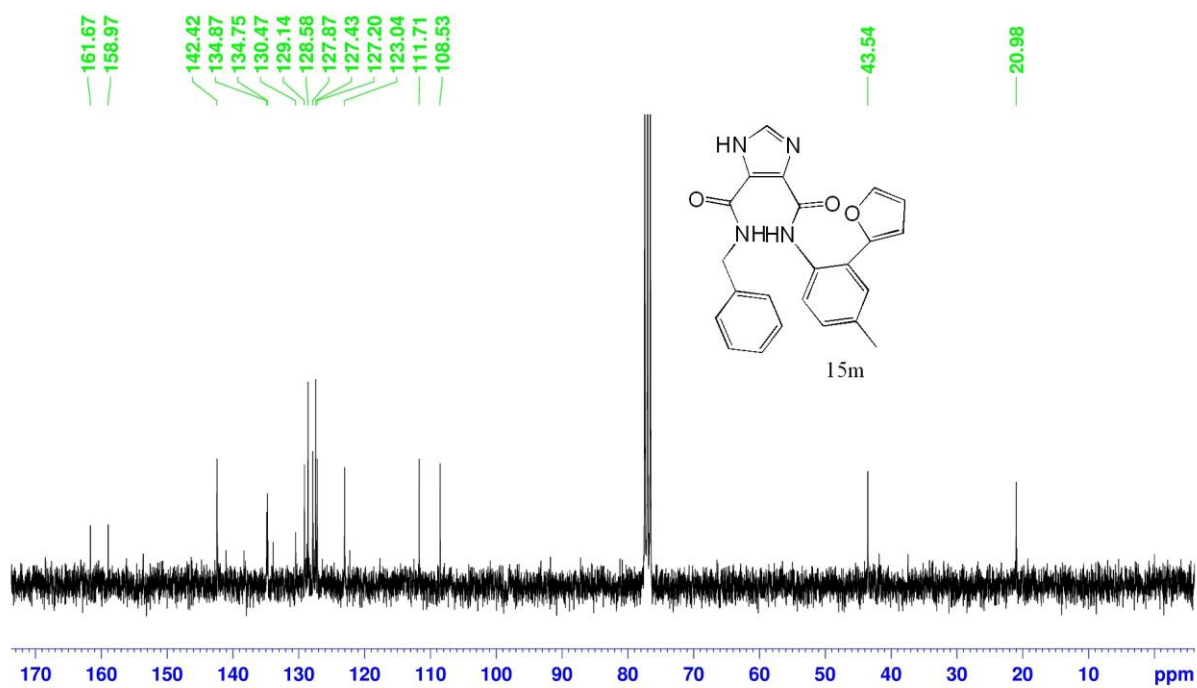

***N*<sup>5</sup>-(4-fluorophenethyl)-*N*<sup>4</sup>-(2-(furan-2-yl)-4-methylphenyl)-1*H*-imidazole-4,5-dicarboxamide (15n)**

HRMS (ES+)

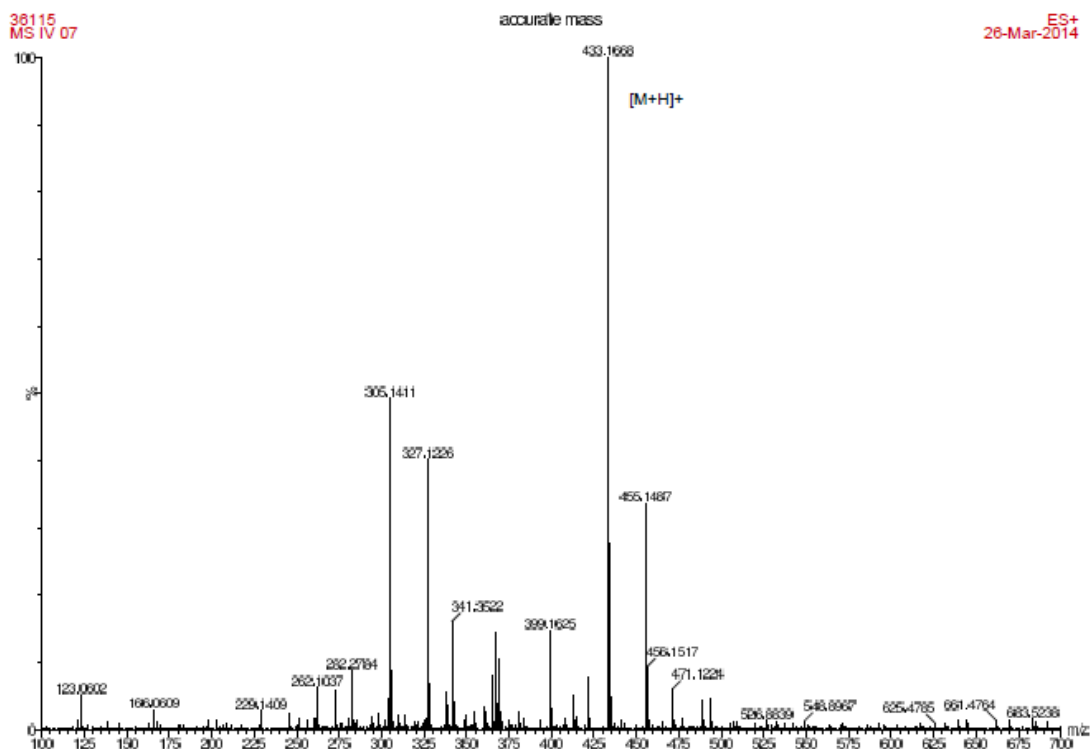

<sup>1</sup>H NMR (300 MHz, CDCl<sub>3</sub>)

MS-IV-07 in CDCl<sub>3</sub>  
22/09/2011

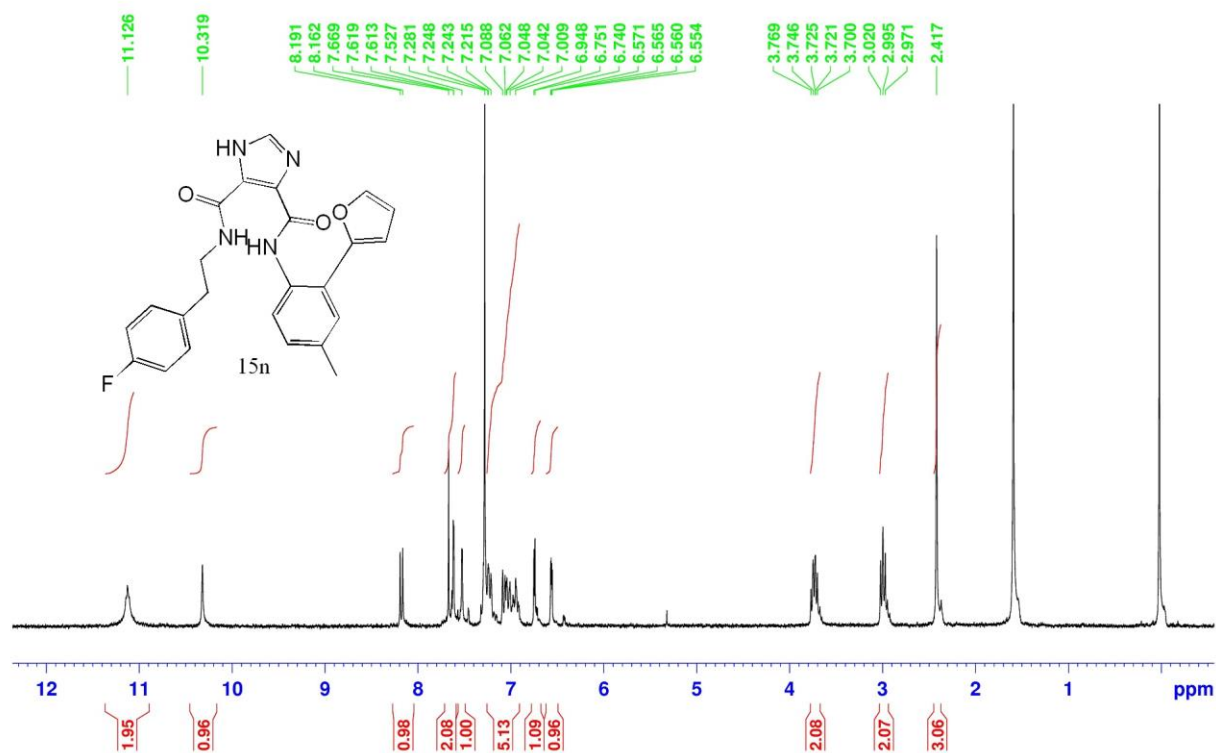

$^{13}\text{C}$  NMR (125 MHz,  $\text{CDCl}_3$ )

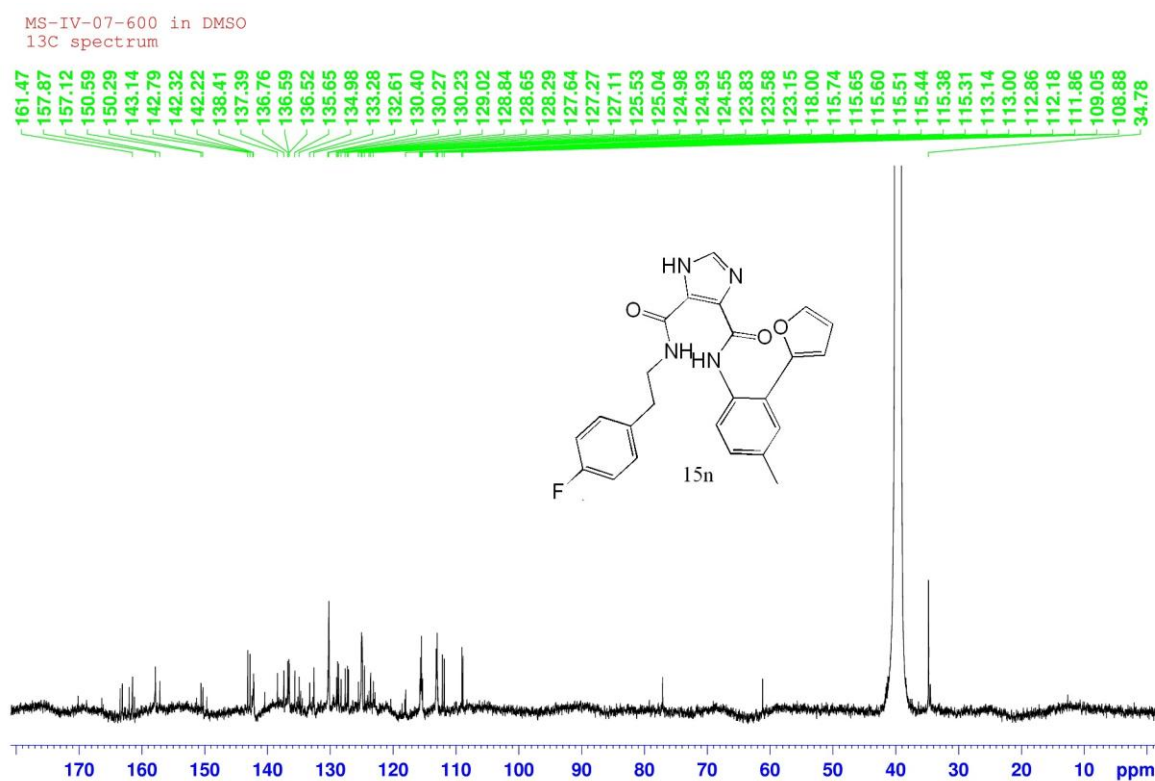

$N^5$ -(5-methyl-3-(5-methylthiophen-2-yl)pyridin-2-yl)- $N^4$ -phenyl-1H-imidazole-4,5-dicarboxamide (**15o**)

HRMS (ES $^+$ )

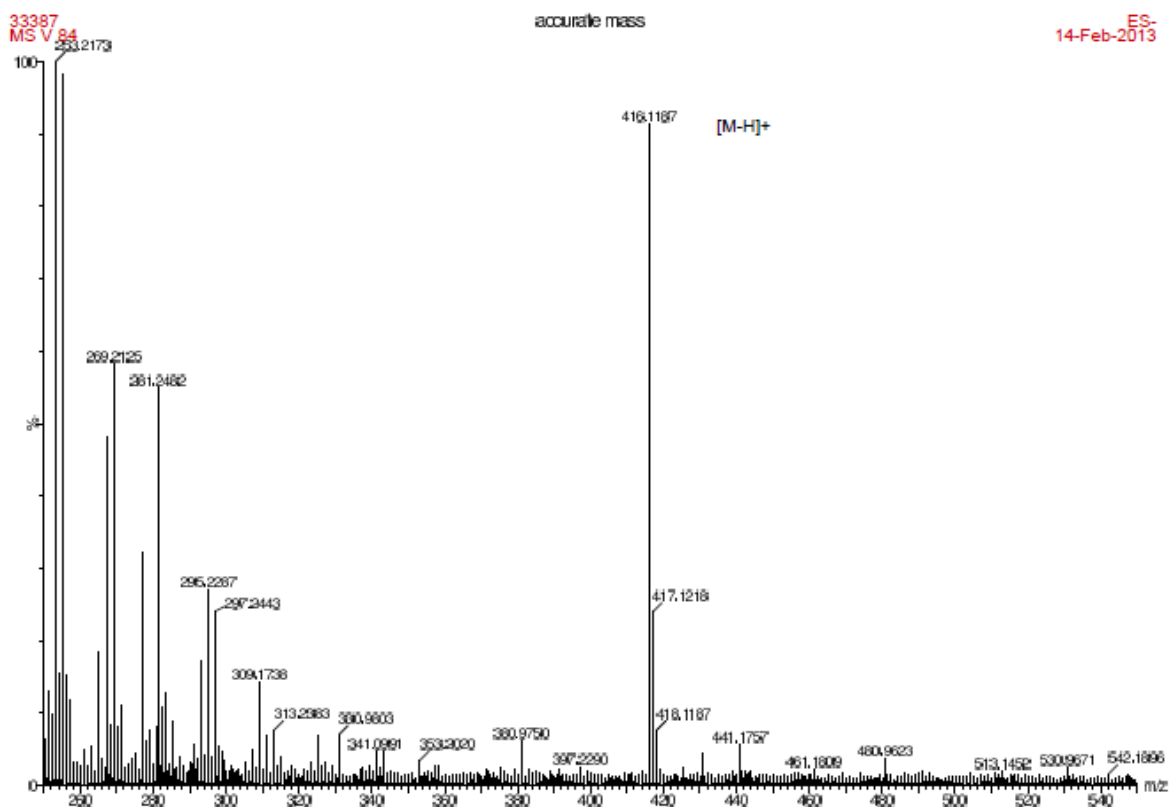

# $^1\text{H}$ NMR (600 MHz, DMSO)

MS-V-84-600 in DMSO  
proton spectrum  
temp=25C  
1 mg

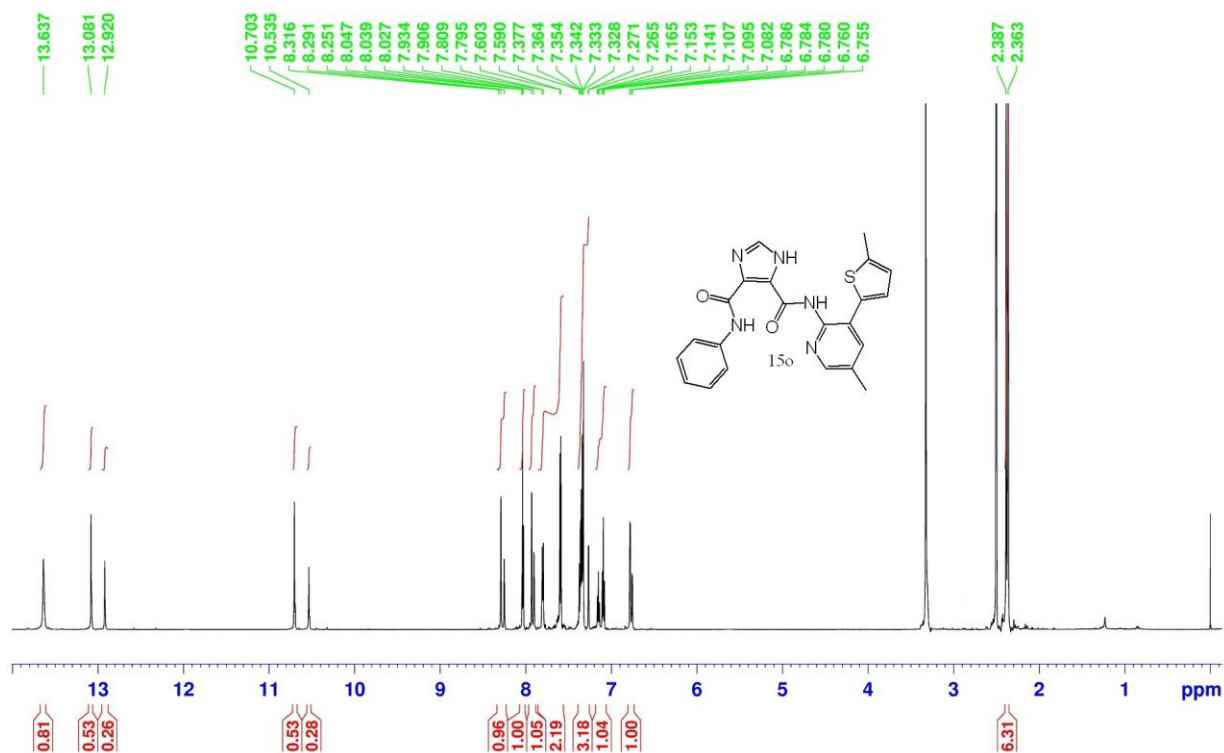

# $^{13}\text{C}$ NMR (150 MHz, DMSO)

MS-V-84-600 in DMSO  
 $^{13}\text{C}$

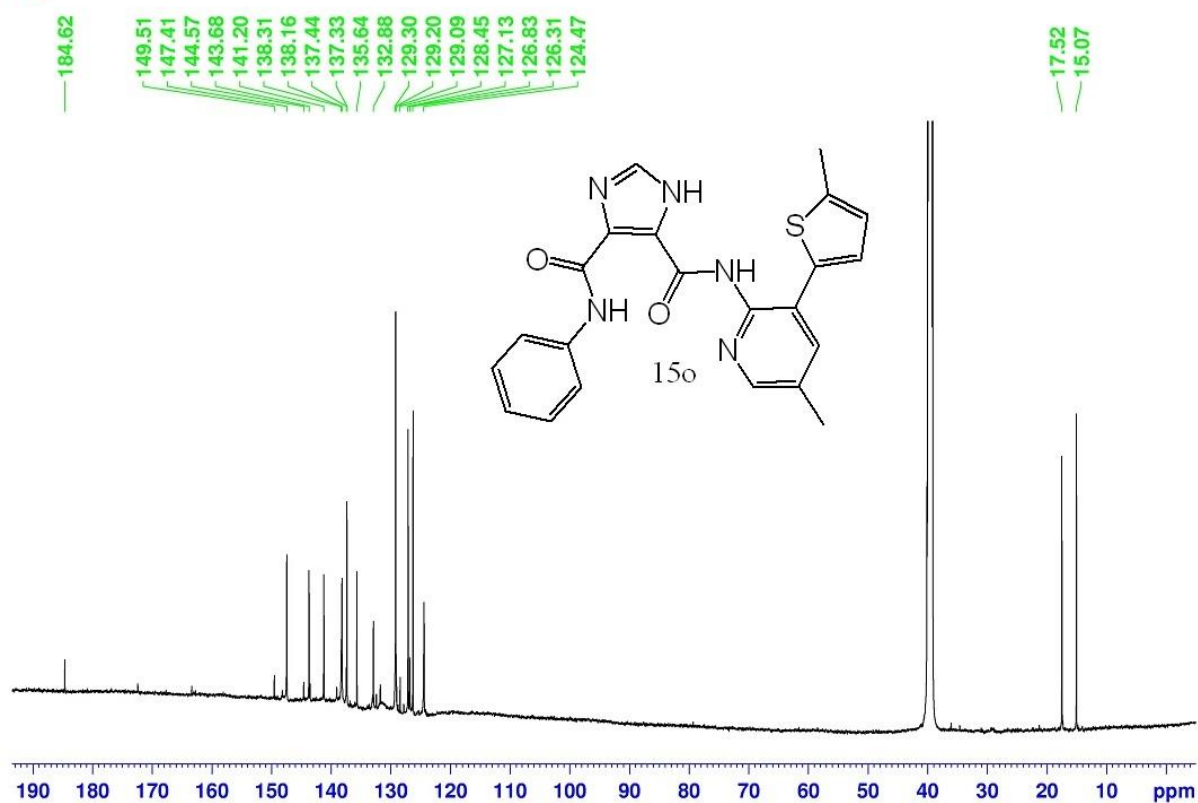

### 3-((4-fluorophenyl)carbamoyl)pyrazine-2-carboxylic acid (18a)

<sup>1</sup>H NMR (300 MHz, DMSO)

MS-IV-23 in DMSO  
02/11/2011

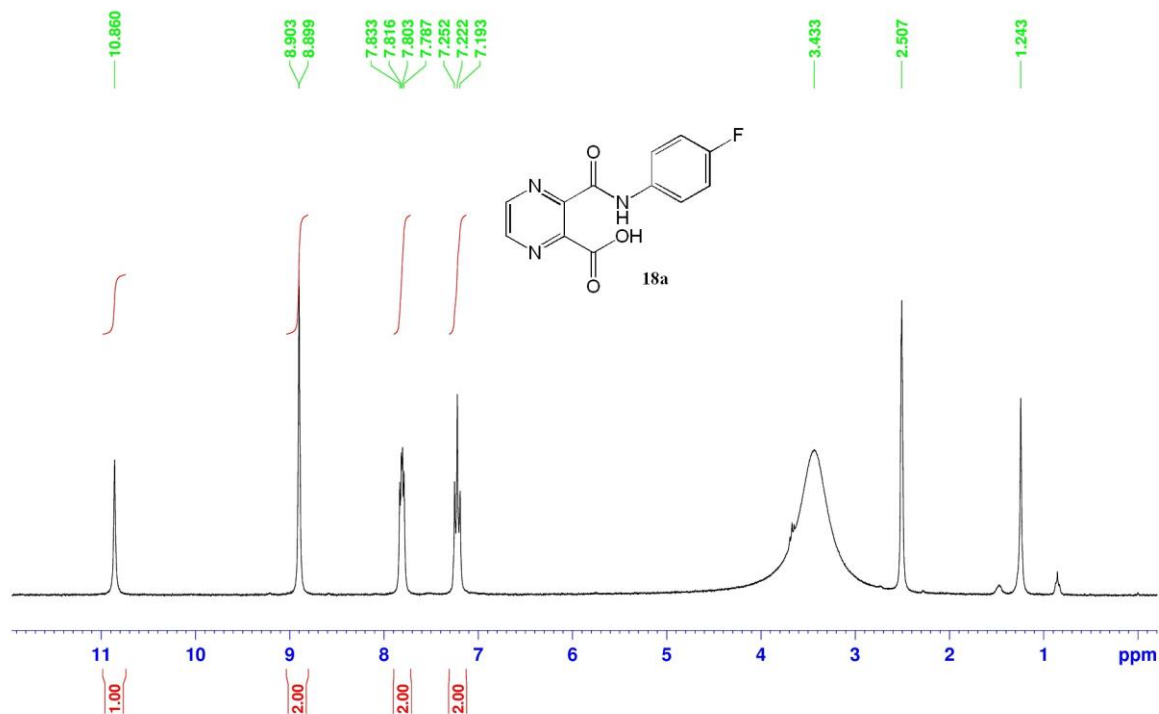

### 3-(p-tolylcarbamoyl)pyrazine-2-carboxylic acid (18b)

<sup>1</sup>H NMR (300 MHz, DMSO)

MS-IV-24 in DMSO  
02/11/2011

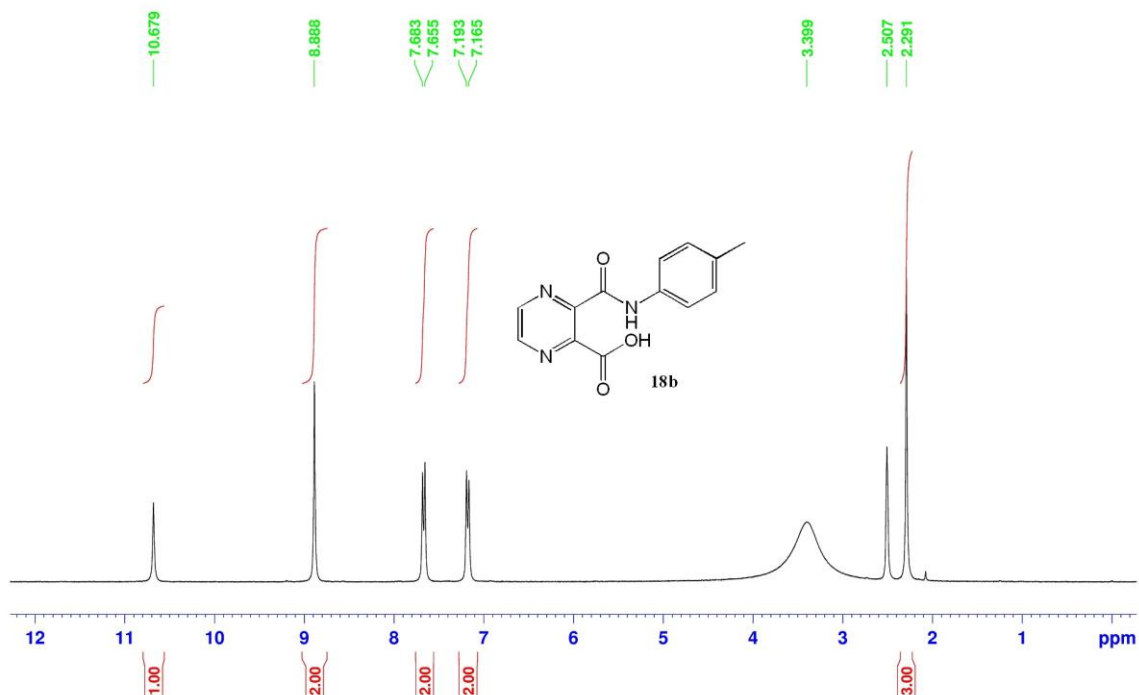

$^{13}\text{C}$  NMR (75 MHz, DMSO)

MS-IV-24 C13 in DMSO  
02/11/2011

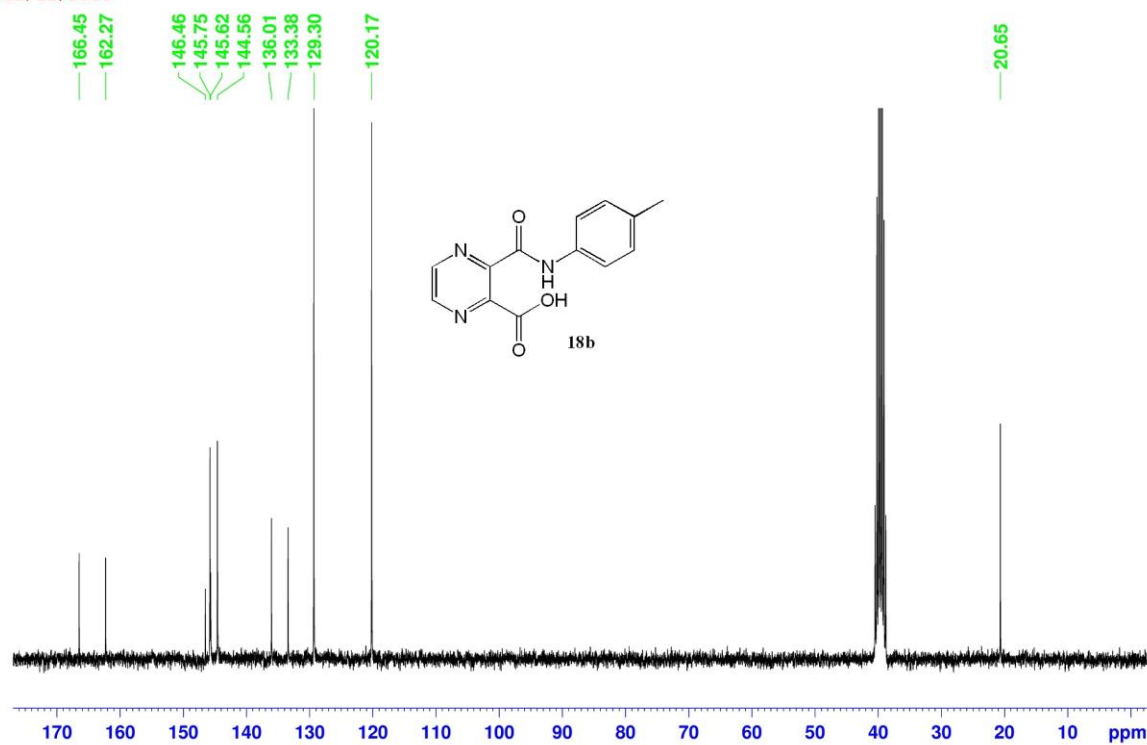

**(Z)-7-((4-fluorophenyl)imino)furo[3,4-b]pyrazin-5(7H)-one (19a)**

$^1\text{H}$  NMR (300 MHz,  $\text{CDCl}_3$ )

MS-IV-25 in  $\text{CDCl}_3$   
25/01/2014

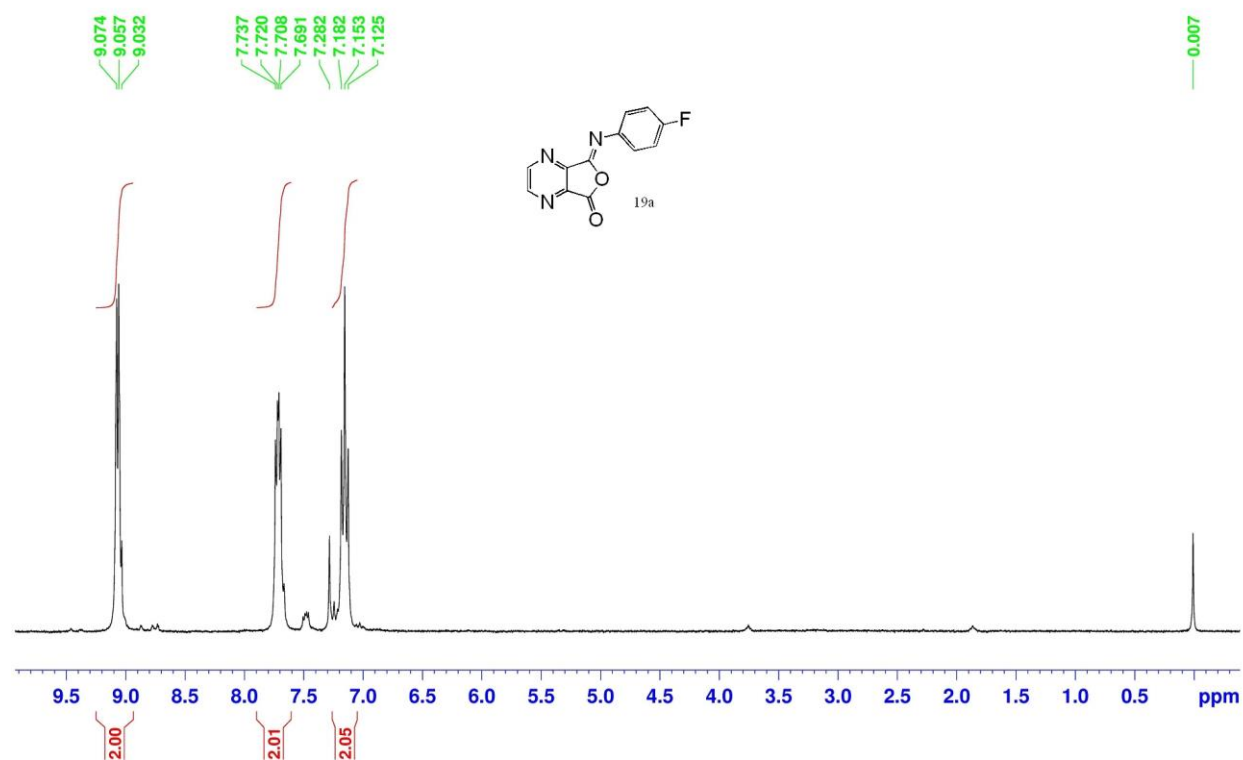

$^{13}\text{C}$  NMR (75 MHz,  $\text{CDCl}_3$ )

MS-IV-25 C13 in  $\text{CDCl}_3$  300 mhz  
25/01/2014

150.85  
149.53  
128.68  
128.57  
116.24  
115.94

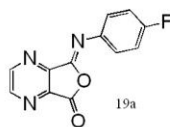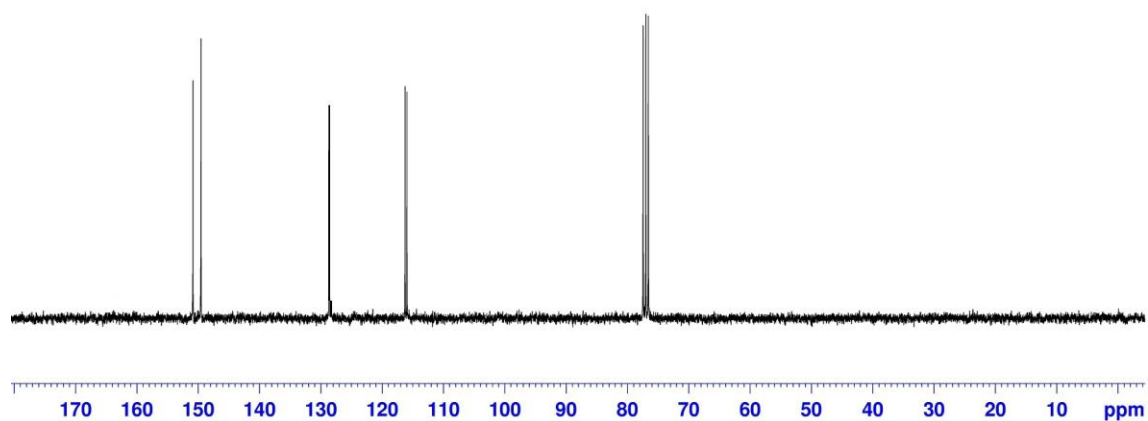

(Z)-7-(p-tolylimino)furo[3,4-b]pyrazin-5(7H)-one (19b)

$^1\text{H}$  NMR (300 MHz,  $\text{CDCl}_3$ )

MS-IV-26 in  $\text{CDCl}_3$   
03/11/2011

9.076  
9.069  
9.046  
9.038  
9.028  
7.649  
7.622  
7.368  
7.301  
7.281

2.430

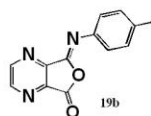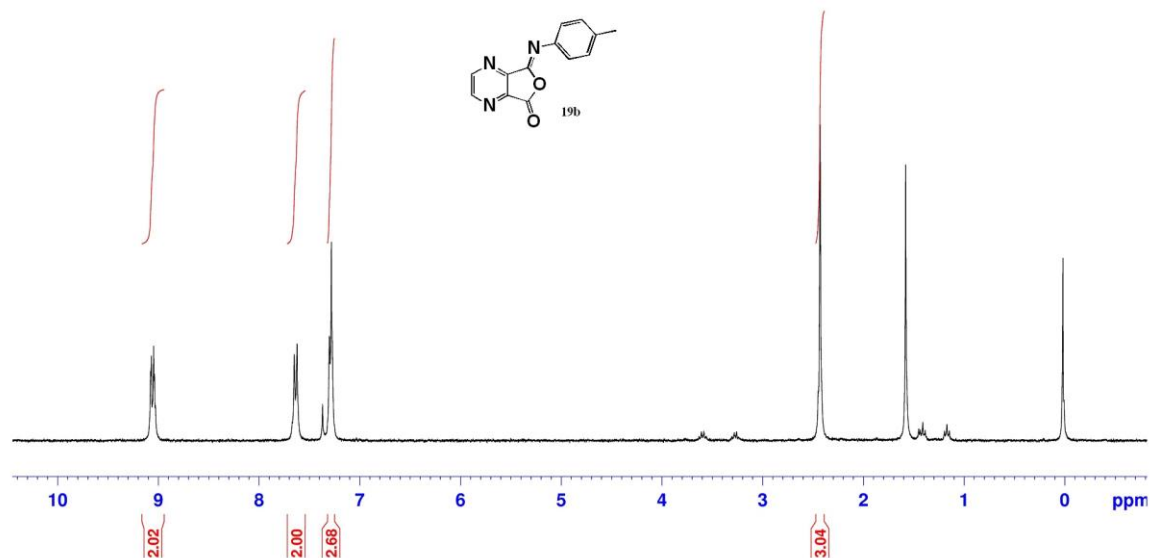

$^{13}\text{C}$  NMR (75 MHz,  $\text{CDCl}_3$ )

MS-IV-26 C13 in  $\text{CDCl}_3$   
03/11/2011

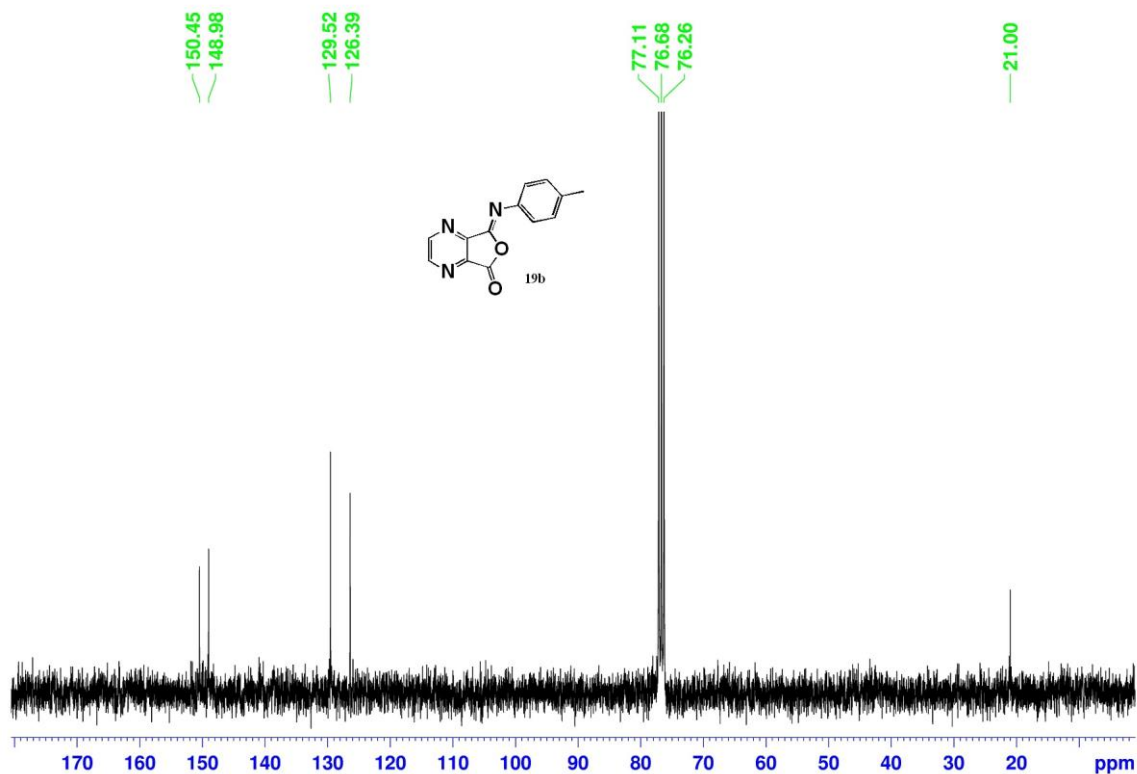

$N^2$ -(4-fluorophenyl)- $N^3$ -(4-(pyridin-4-yl) benzyl) pyrazine-2,3-dicarboxamide  
(20a)

HRMS (ES+)

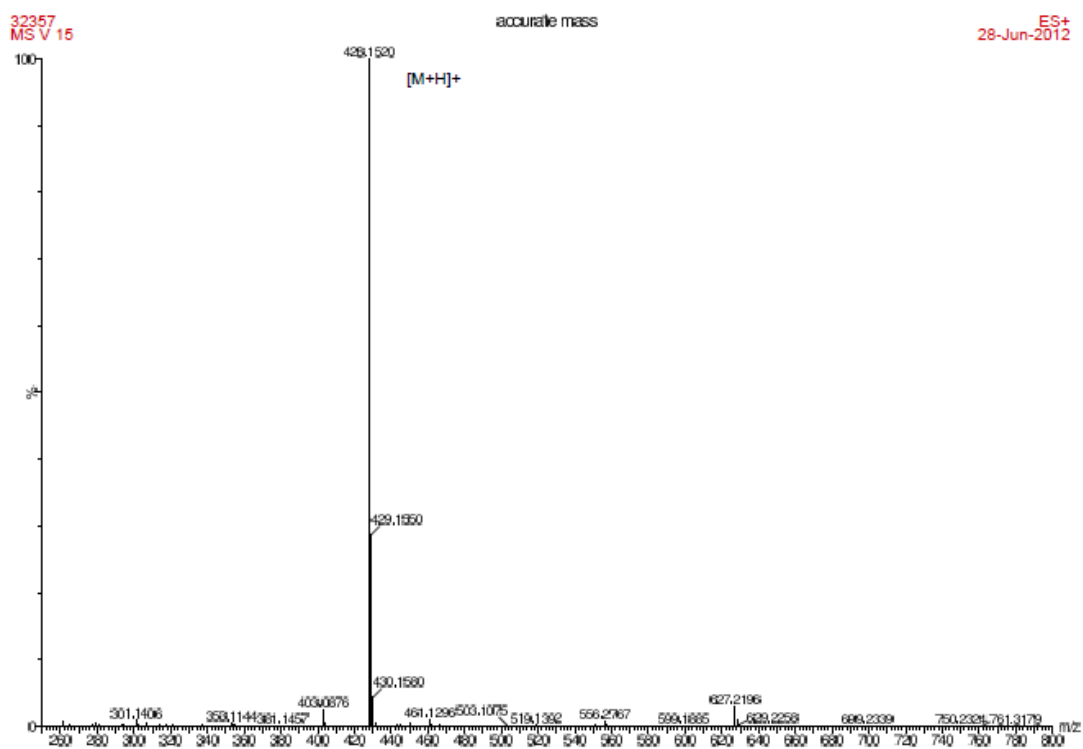



# <sup>1</sup>H NMR (300 MHz, DMSO)

MS-V-15 in DMSO  
20/06/2012

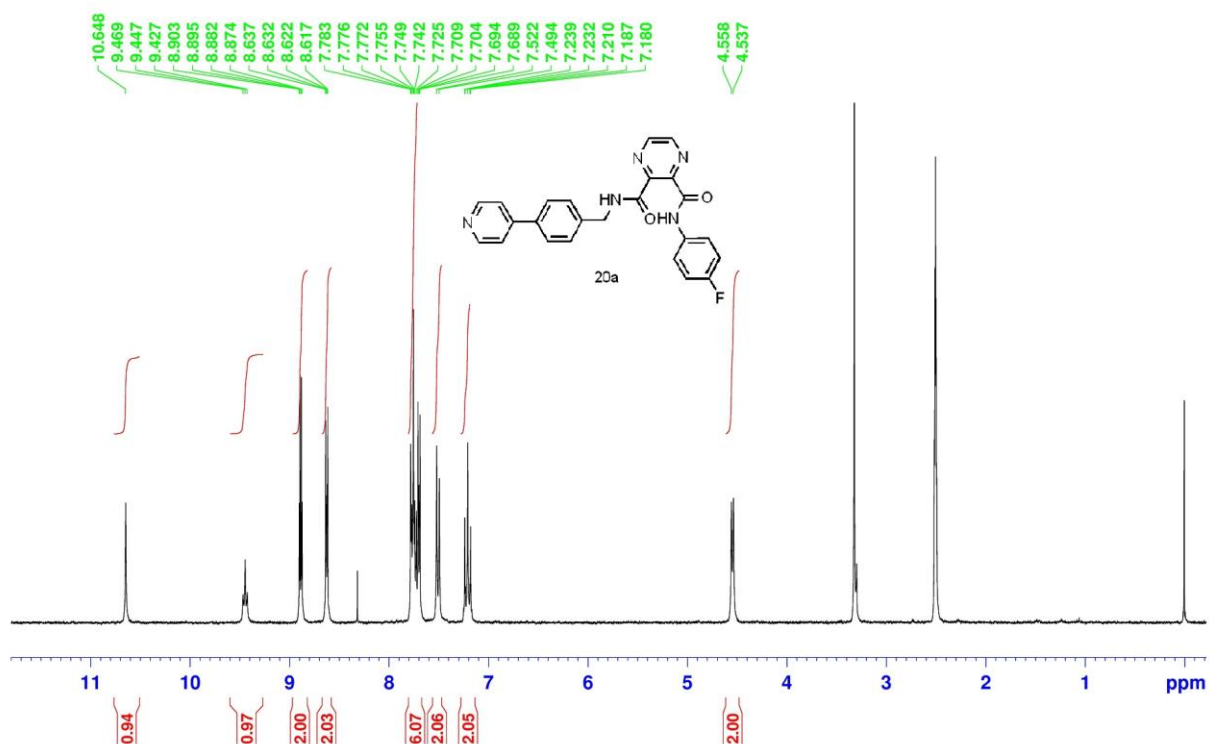

# <sup>13</sup>C NMR (75 MHz, DMSO)

MS-V-15C13 in DMSO  
20/06/2012

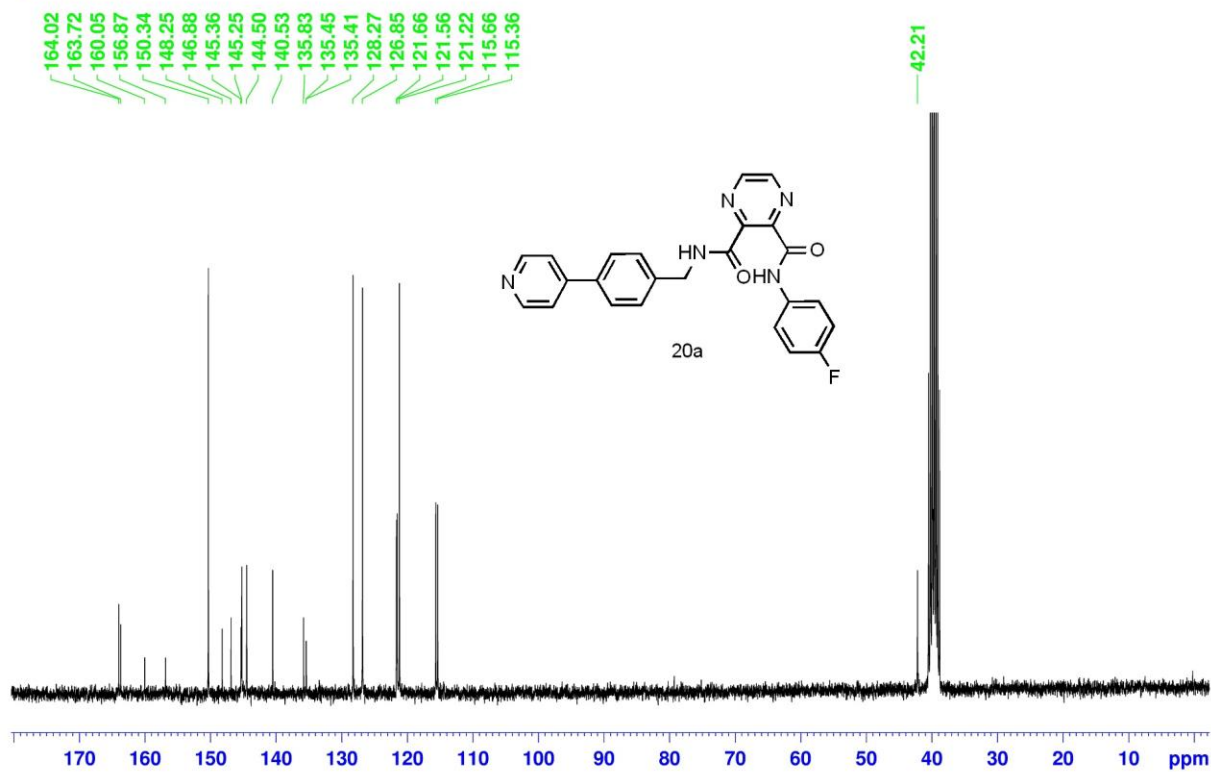

***N*<sup>2</sup>-(4-fluorophenyl)-*N*<sup>3</sup>-(4-methyl-2-(pyridin-3-yl)phenyl)pyrazine-2,3-dicarboxamide (20b)**

HRMS (ES+)

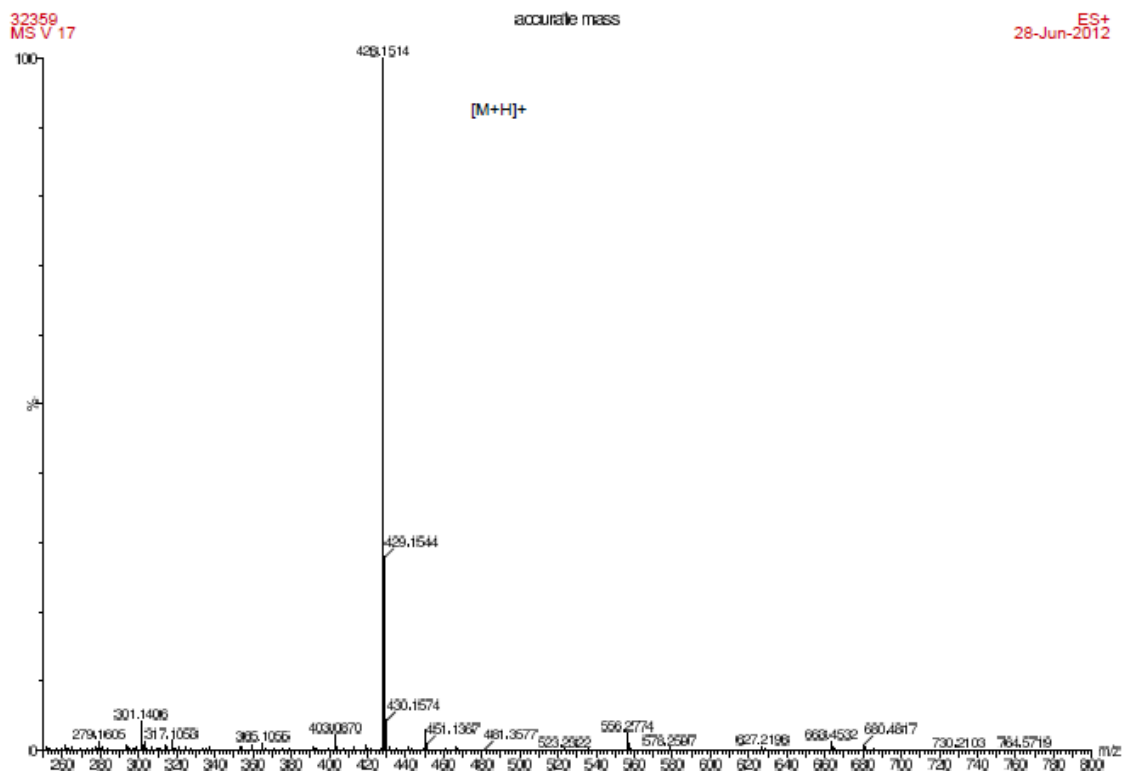

<sup>1</sup>H NMR (300 MHz, CDCl<sub>3</sub>)

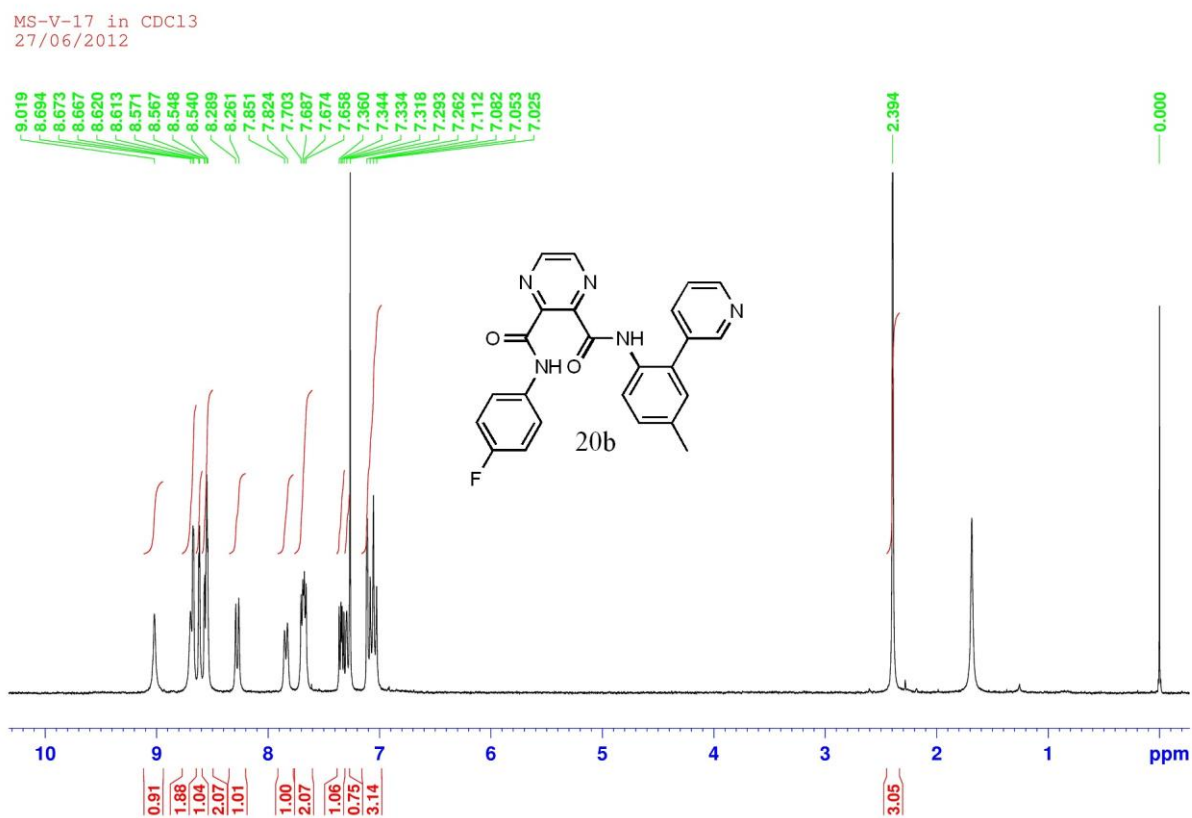

$^{13}\text{C}$  NMR (75 MHz,  $\text{CDCl}_3$ )

MS-V-17 C13 in  $\text{CDCl}_3$   
29/06/2012

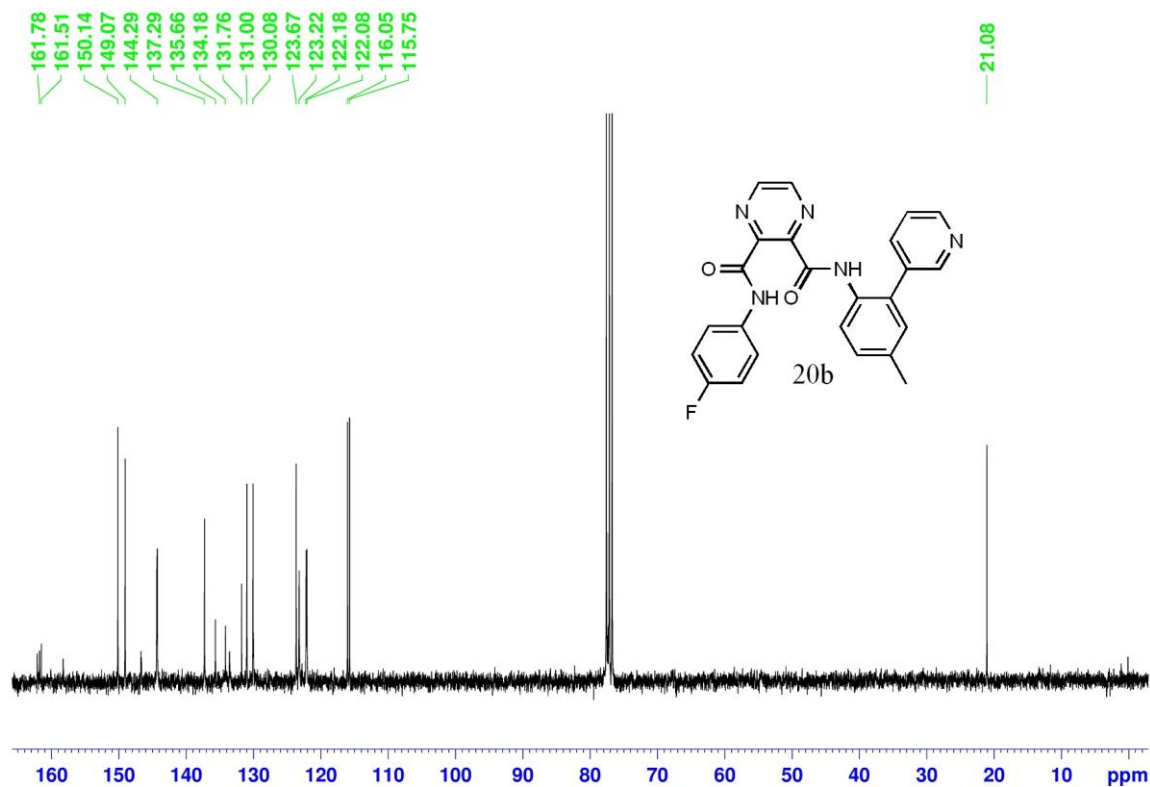

$N^2$ -(4-fluorophenyl)- $N^3$ -(4-(pyridin-3-yl) benzyl) pyrazine-2,3-dicarboxamide (20c)

HRMS (ES+)

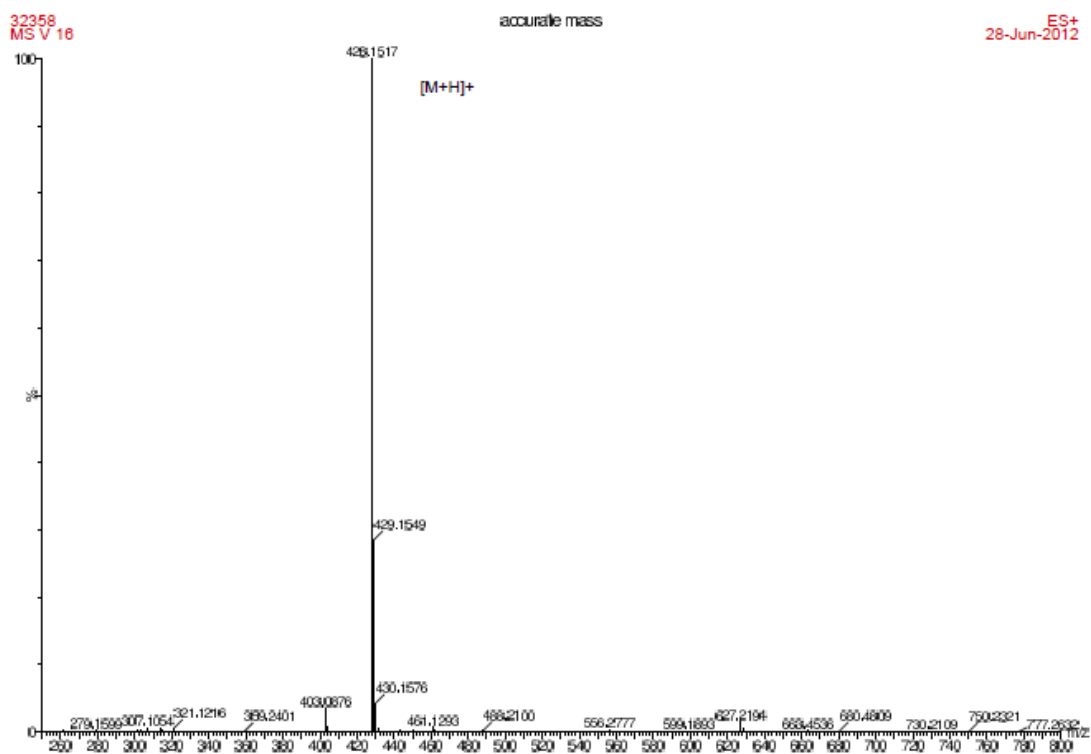

$^1\text{H}$  NMR (300 MHz,  $\text{CDCl}_3$ )

MS-V-16 in  $\text{CDCl}_3$   
27/06/2012

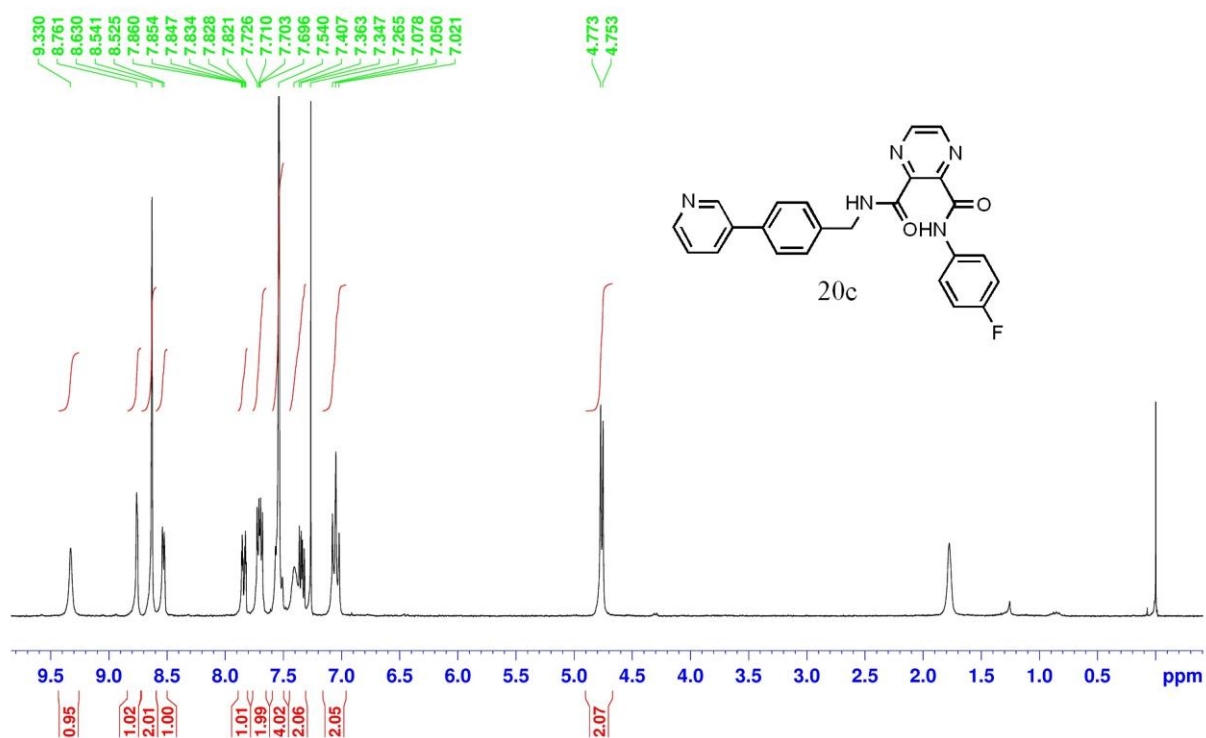

$^{13}\text{C}$  NMR (75 MHz,  $\text{CDCl}_3$ )

MS-V-16 C13 in  $\text{CDCl}_3$   
28/06/2012

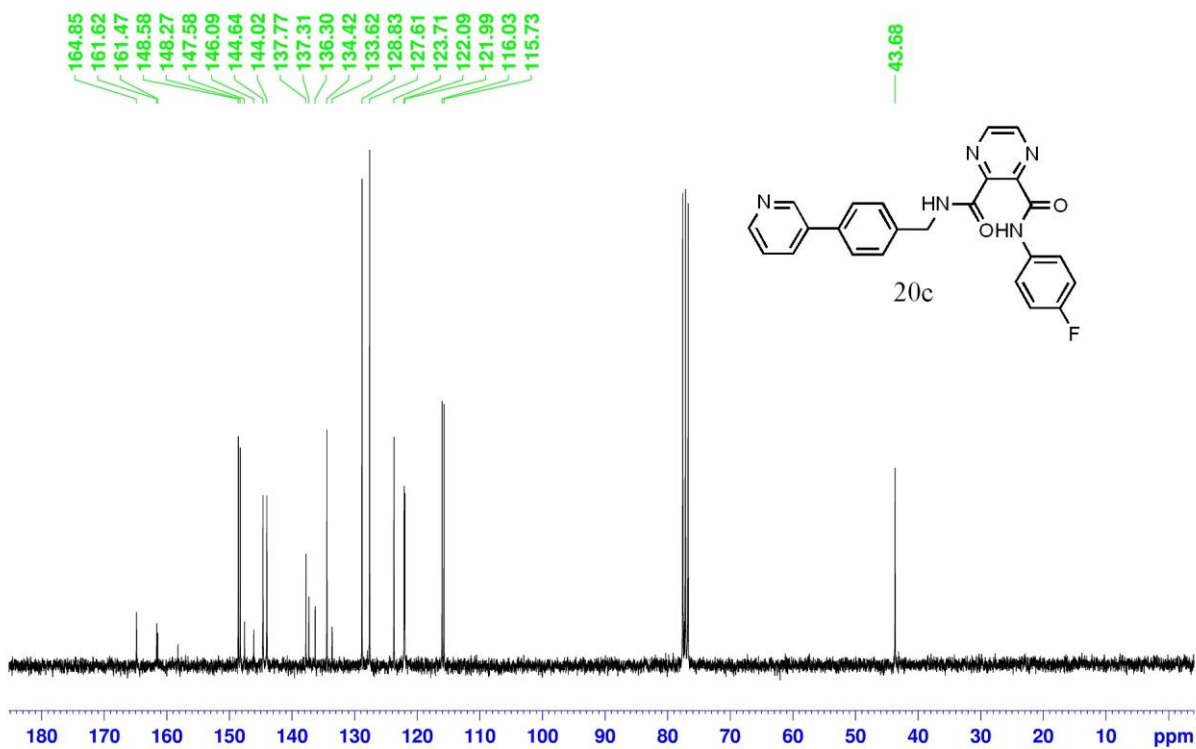

***N*<sup>2</sup>-(4-fluorophenyl)-*N*<sup>3</sup>-(2-(pyridin-4-yl) phenyl) pyrazine-2,3-dicarboxamide (20d)**

HRMS (ES<sup>+</sup>)

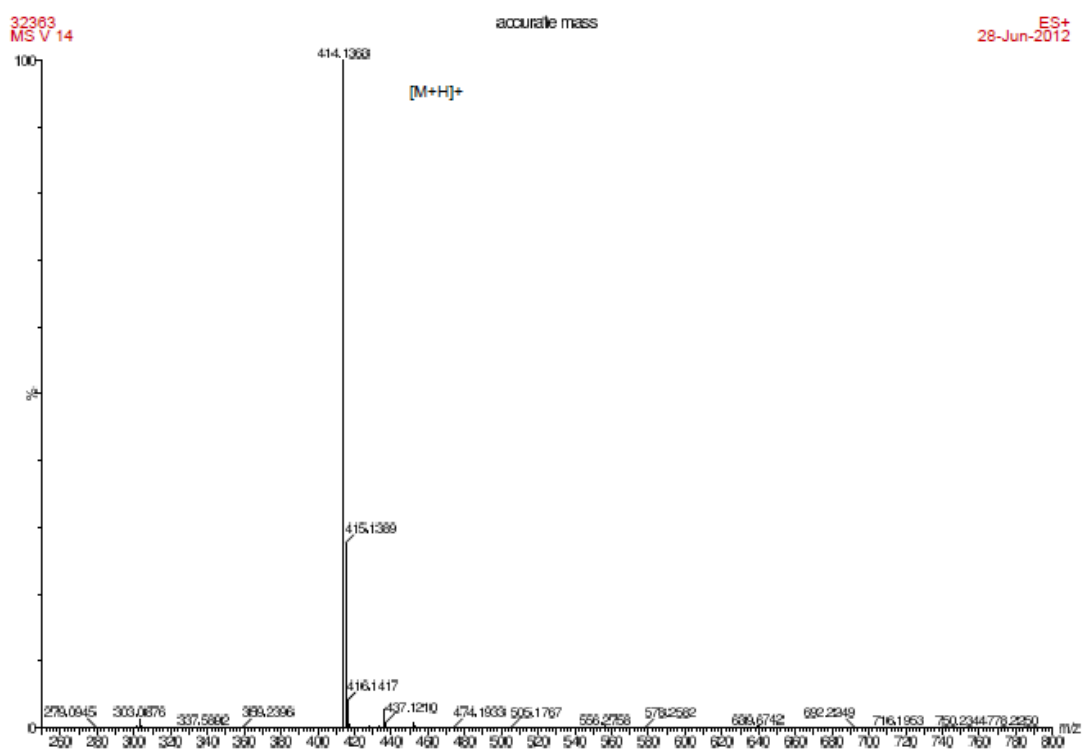

<sup>1</sup>H NMR (300 MHz, DMSO)

MS-V-14 in DMSO  
20/06/2012

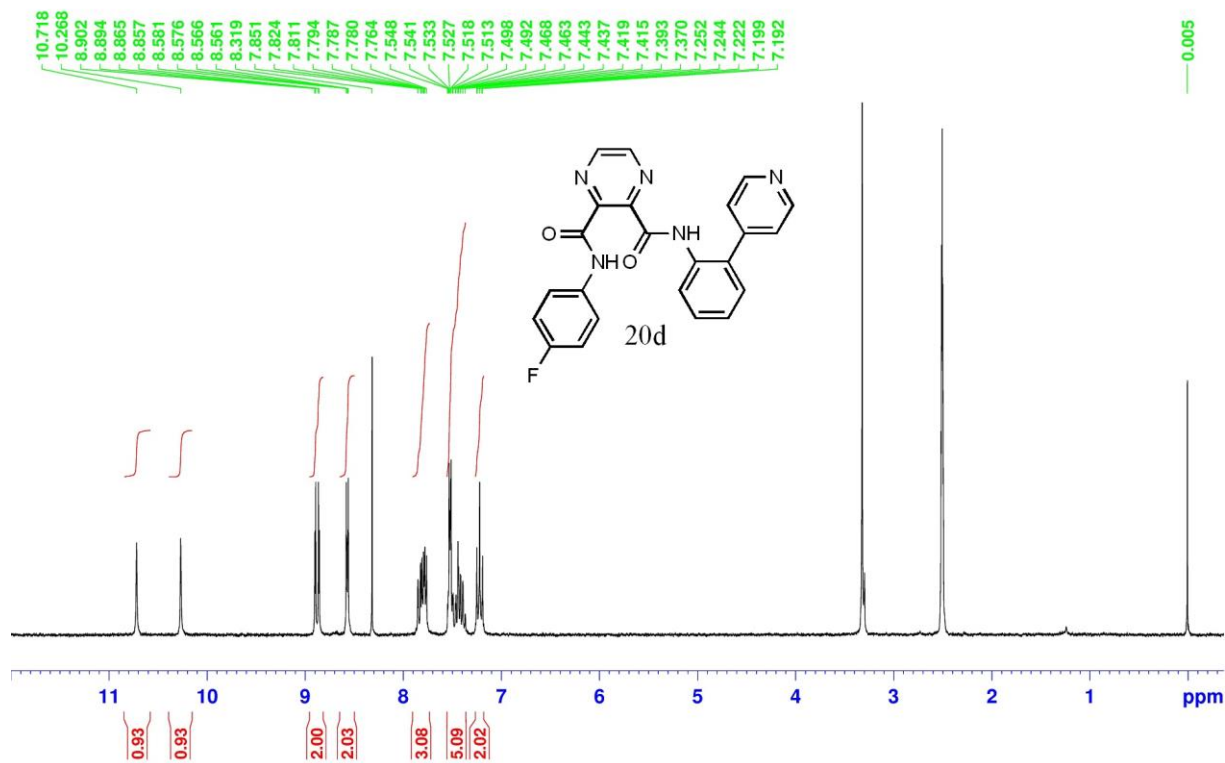

$^{13}\text{C}$  NMR (75 MHz, DMSO)

MS-V-14 C13 in DMSO  
20/06/2012

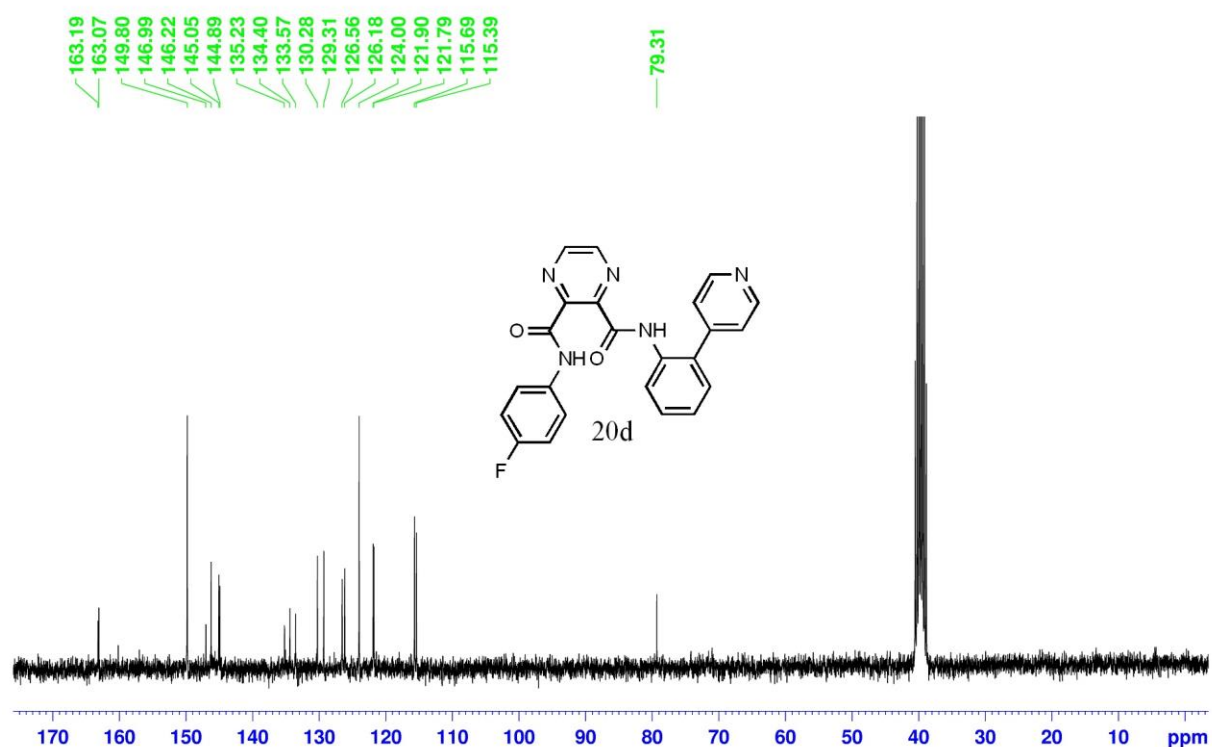

$N^2$ -(4-fluorophenyl)- $N^3$ -(2-(pyridin-3-yl) phenyl) pyrazine-2,3-dicarboxamide (20e)

HRMS (ES+)

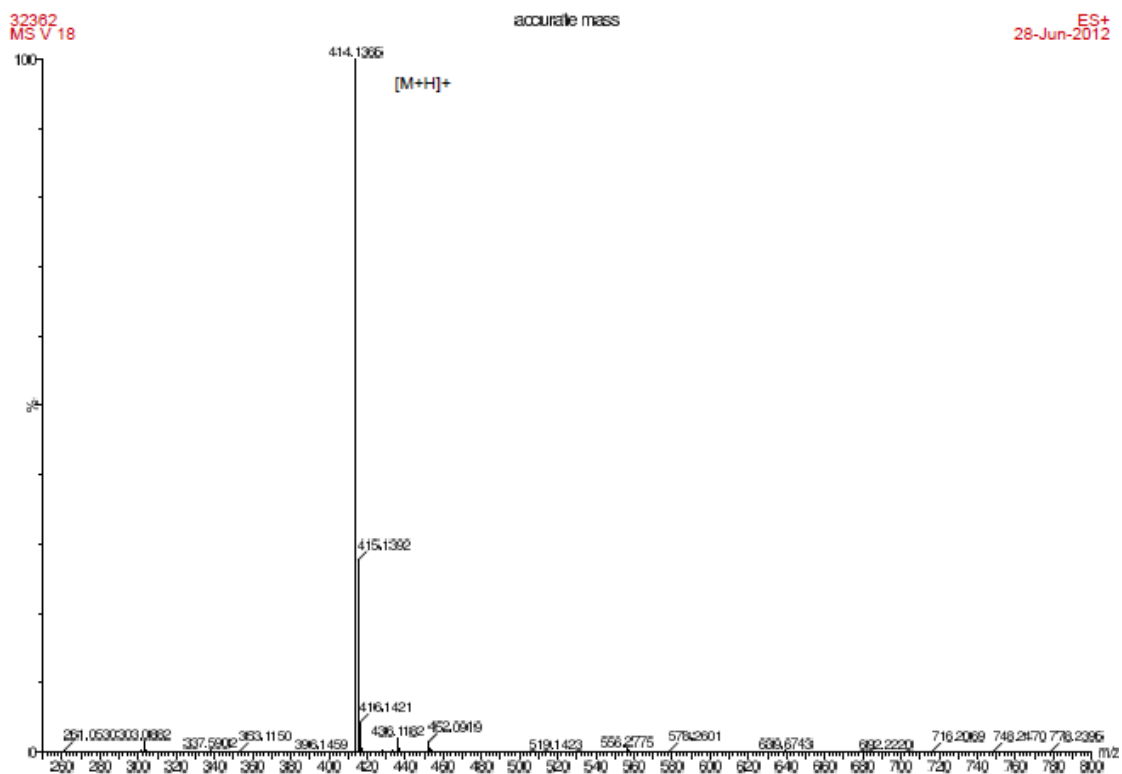

# <sup>1</sup>H NMR (300 MHz, CDCl<sub>3</sub>)

MS-V-18 in CDCl<sub>3</sub>  
27/06/2012

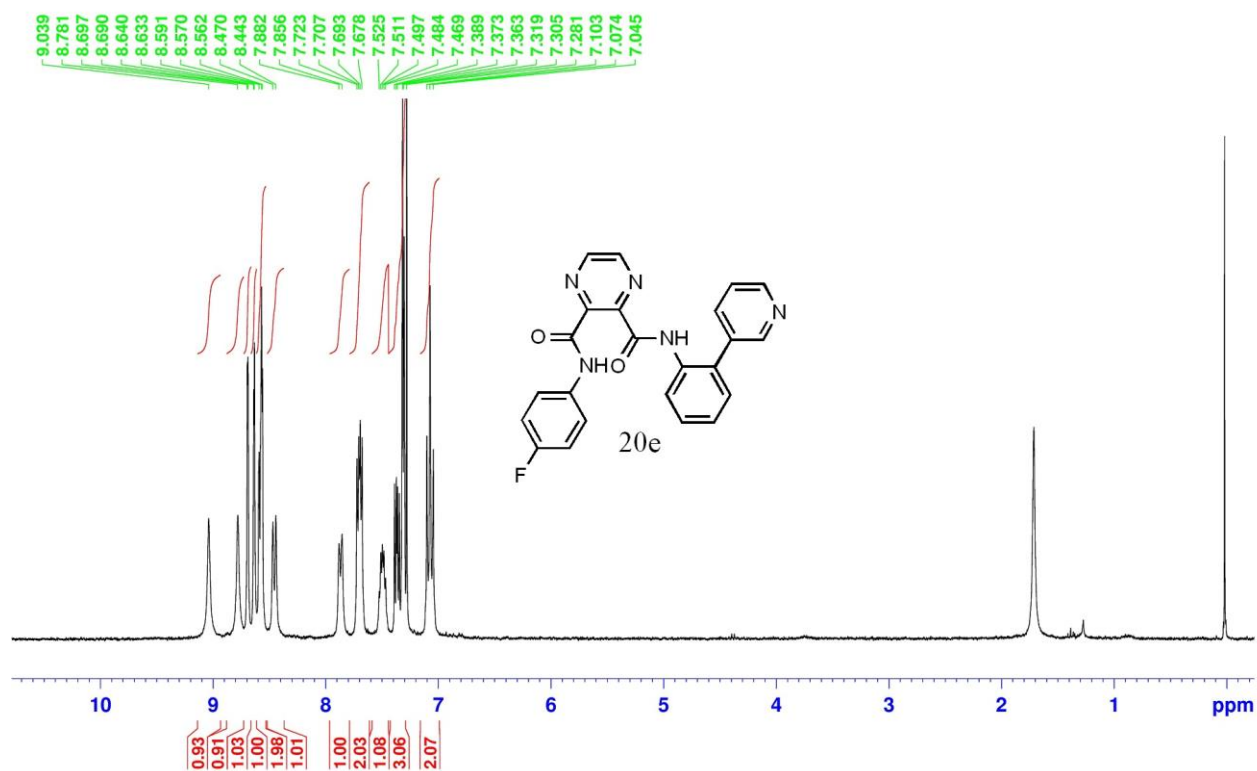

# <sup>13</sup>C NMR (75 MHz, CDCl<sub>3</sub>)

MS-V-18 C13 in CDCl<sub>3</sub>  
02/07/2012

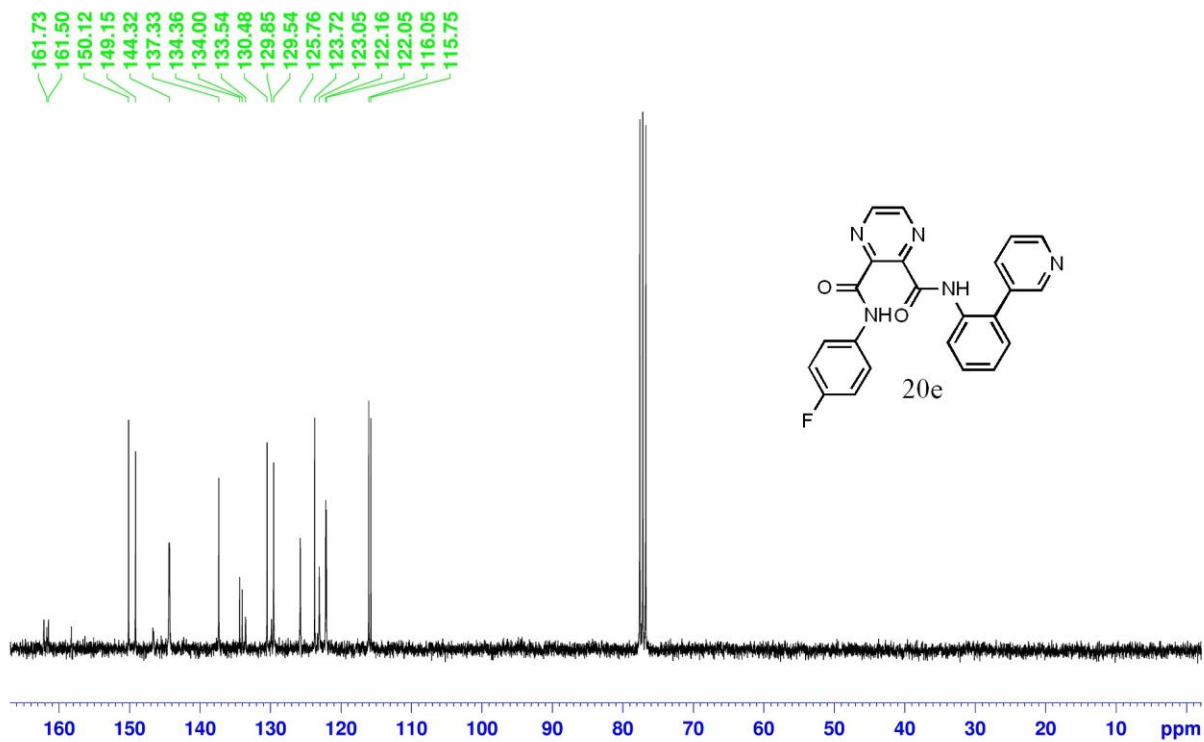

***N*<sup>2</sup>-(4-fluorophenyl)-*N*<sup>3</sup>-(2-(pyridin-4-yl) benzyl) pyrazine-2,3-dicarboxamide (20f)**

HRMS (ES<sup>+</sup>)

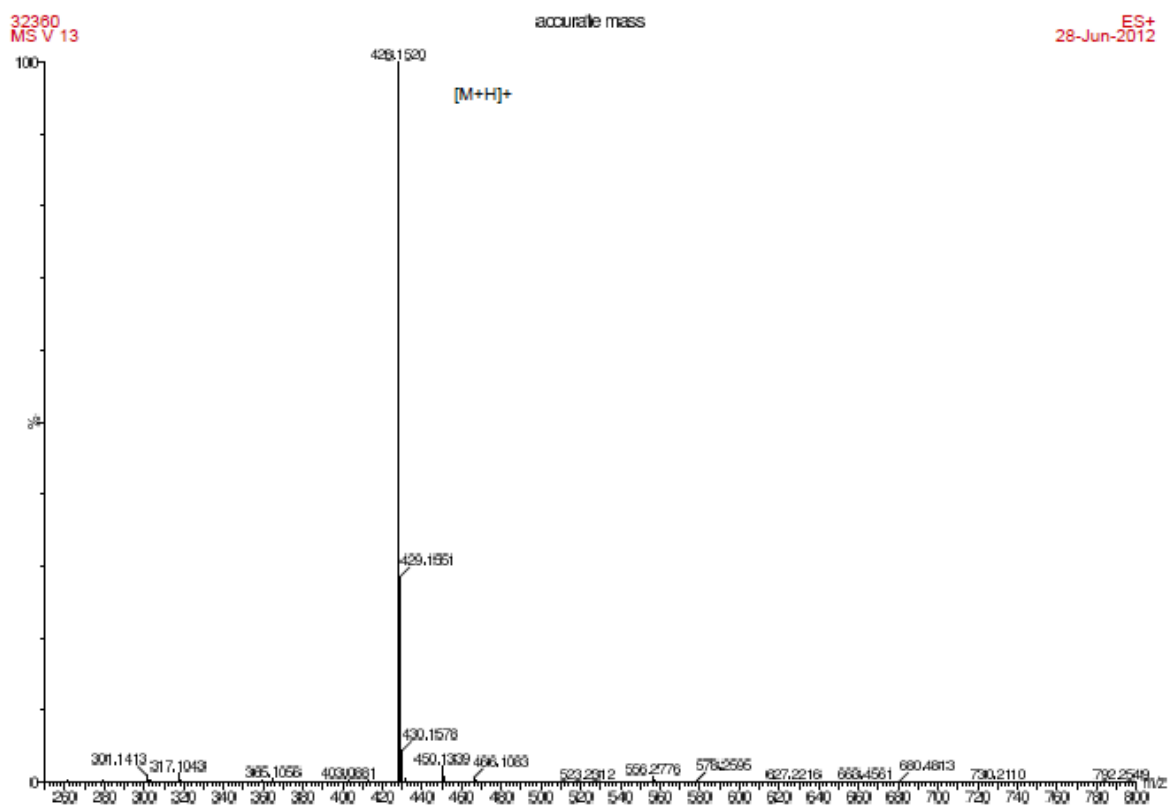

<sup>1</sup>H NMR (600 MHz, DMSO)

MS-V-13-600 in DMSO  
proton spectrum  
temp=25C

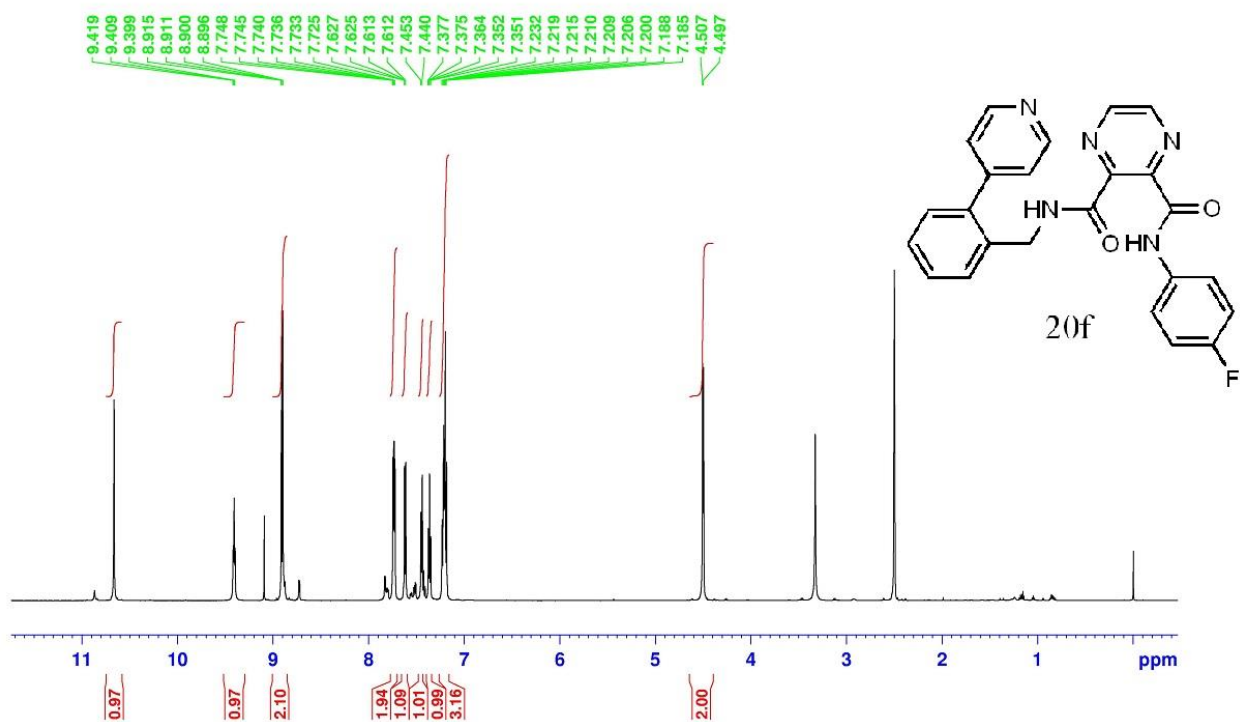



$^{13}\text{C}$  NMR (150 MHz, DMSO)

MS-V-13-600 in DMSO  
 $^{13}\text{C}$

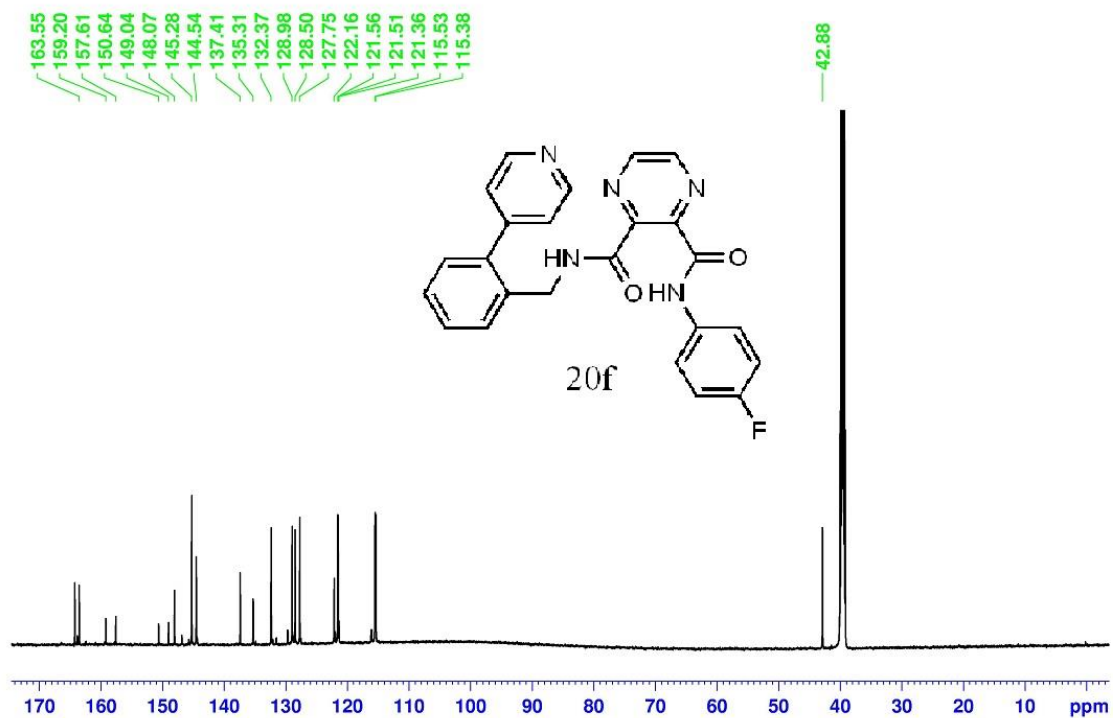

$N^2$ -(4-fluorophenyl)- $N^3$ -(4-methyl-2-(pyridin-4-yl)phenyl)pyrazine-2,3-dicarboxamide (20g)

HRMS (ES+)

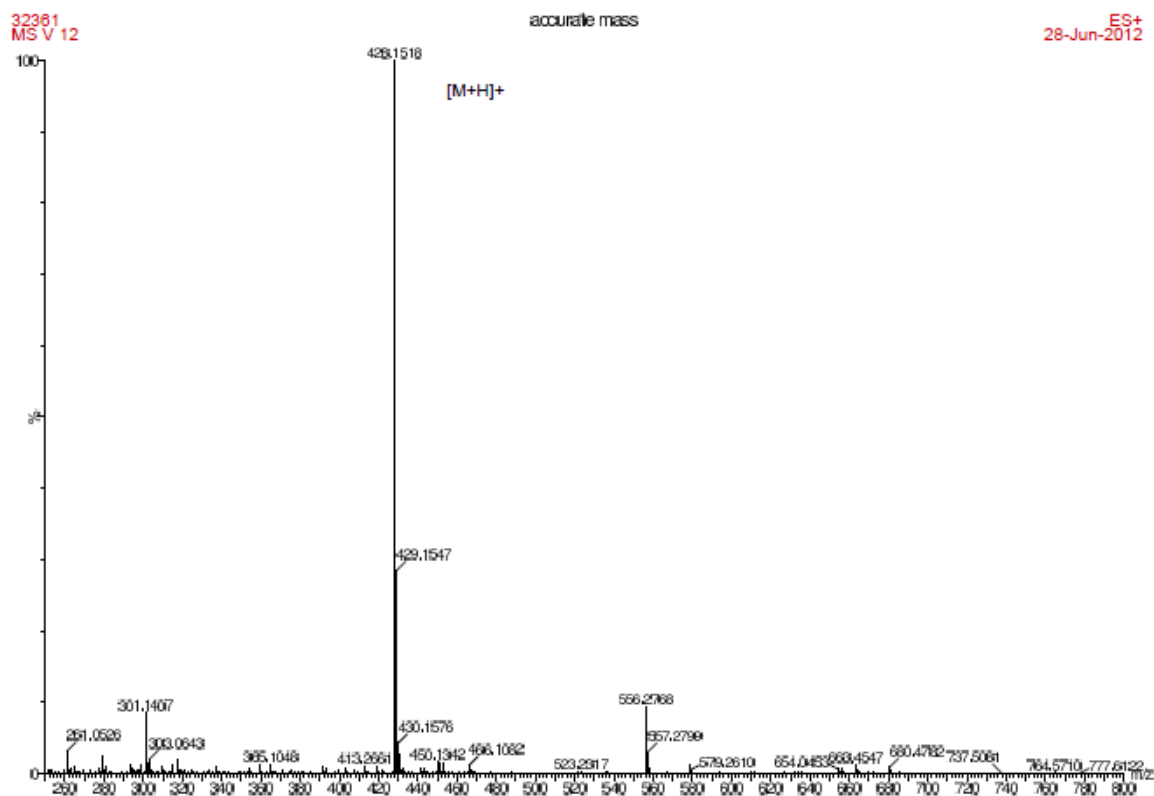

$^1\text{H}$  NMR (300 MHz,  $\text{CDCl}_3$ )

MS-V-12 in  $\text{CDCl}_3$   
27/06/2012

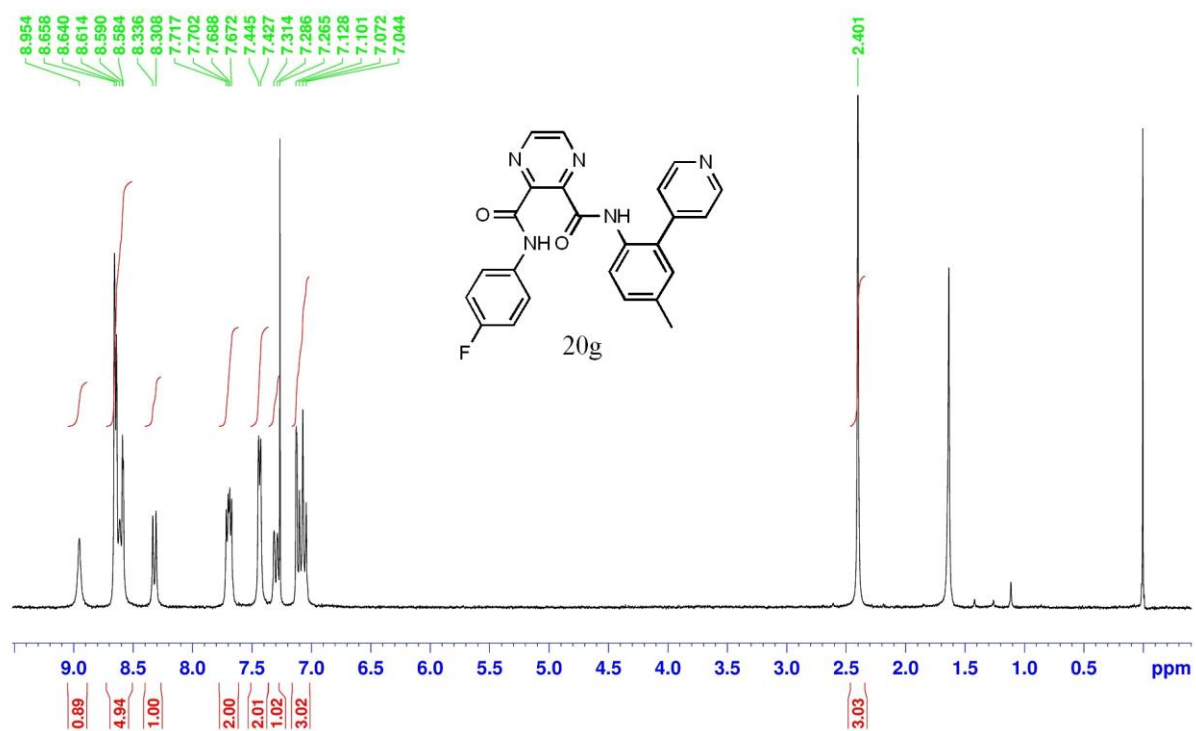

$^{13}\text{C}$  NMR (75 MHz,  $\text{CDCl}_3$ )

MS-V-12 C13 in  $\text{CDCl}_3$   
27/06/2012

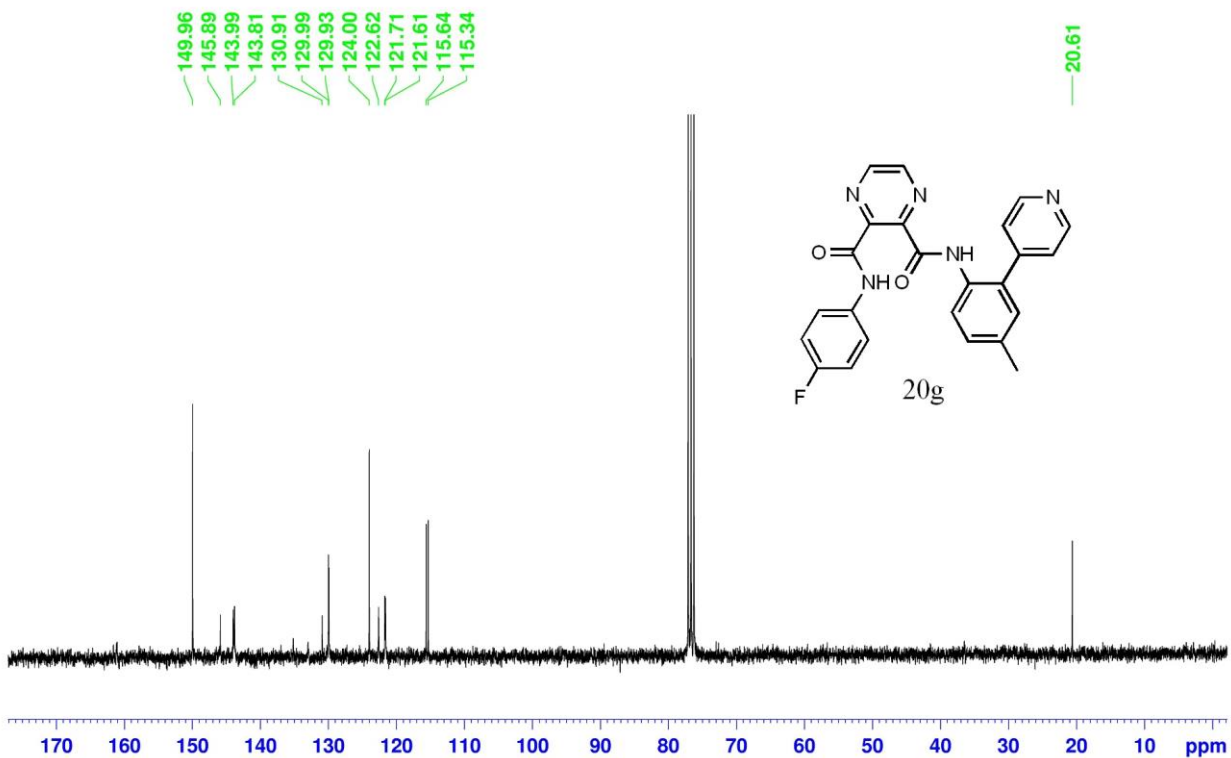

***N*<sup>2</sup>-(4-(pyridin-4-yl) benzyl)-*N*<sup>3</sup>-(p-tolyl) pyrazine-2,3-dicarboxamide (20h)**

HRMS (ES<sup>+</sup>)

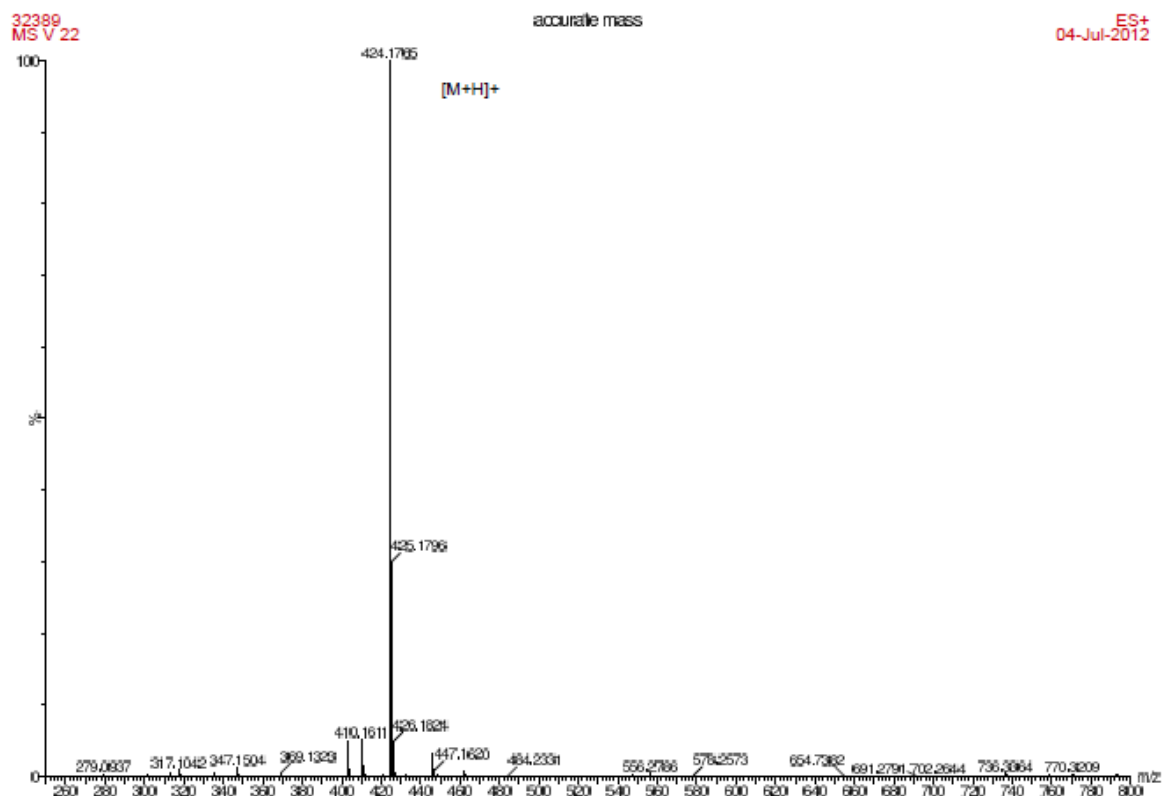

<sup>1</sup>H NMR (300 MHz, CDCl<sub>3</sub>)

MS-V-22 in CDCl<sub>3</sub>  
03/07/2012

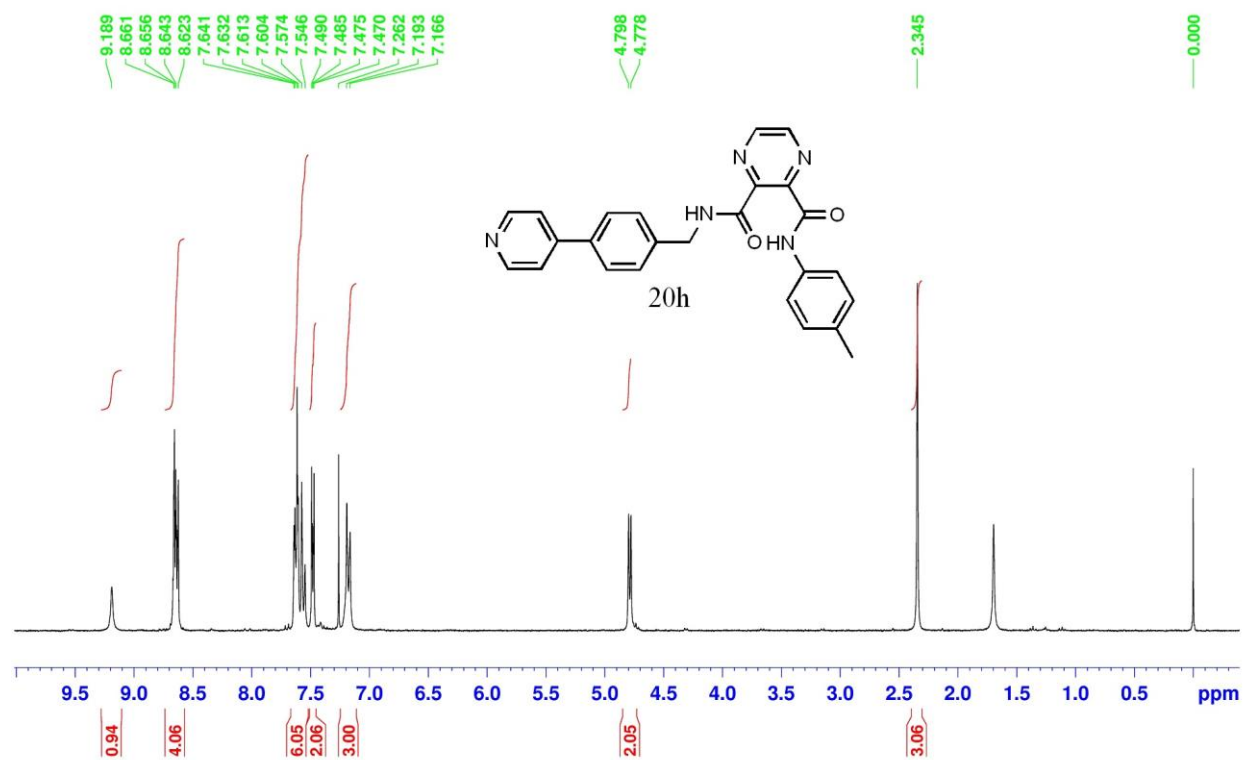

$^{13}\text{C}$  NMR (75 MHz,  $\text{CDCl}_3$ )

MS-V-22 C13 in  $\text{CDCl}_3$   
03/07/2012

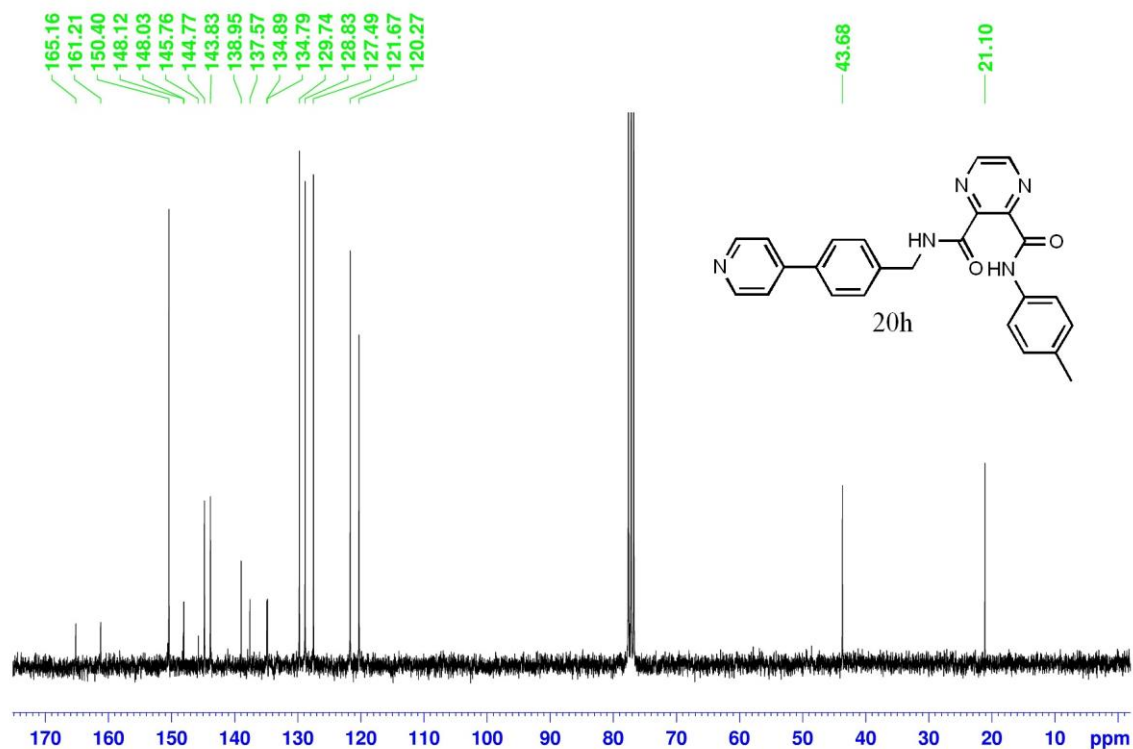

$N^2$ -(4-methyl-2-(pyridin-3-yl) phenyl)- $N^3$ -(p-tolyl) pyrazine-2,3-dicarboxamide  
(**20i**)

HRMS (ES+)

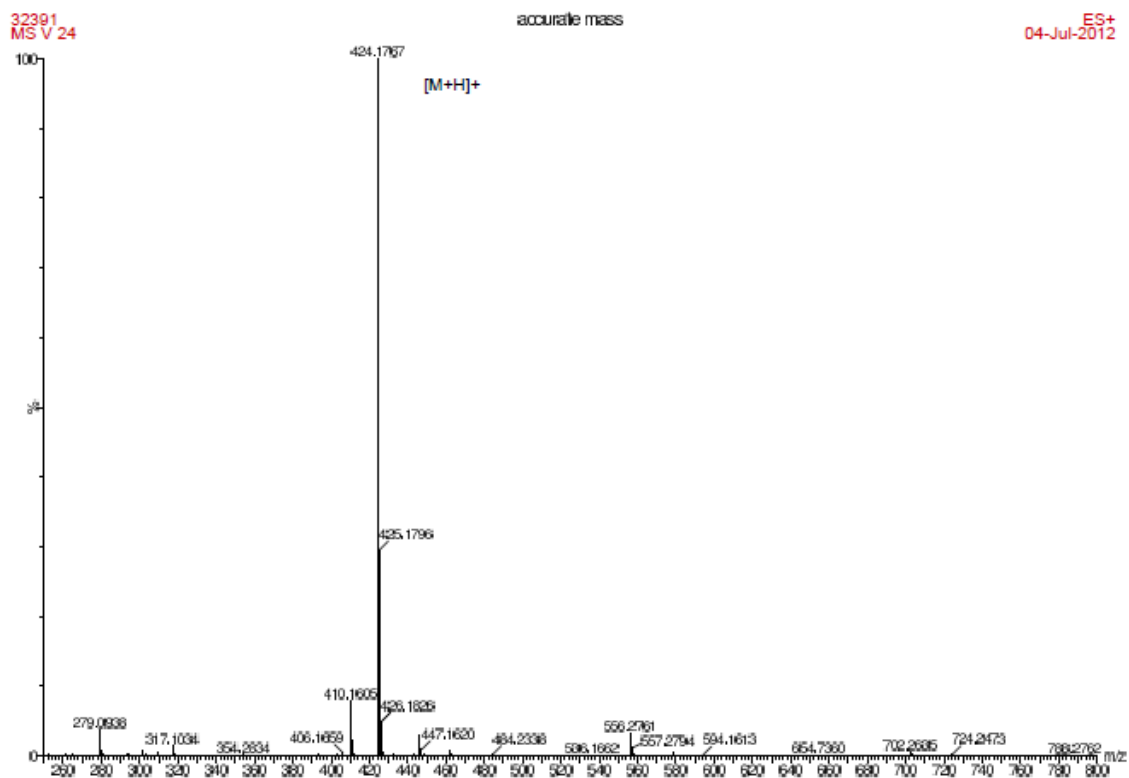

# <sup>1</sup>H NMR (300 MHz, CDCl<sub>3</sub>)

MS-V-24 in CDCl<sub>3</sub>  
08/07/2012

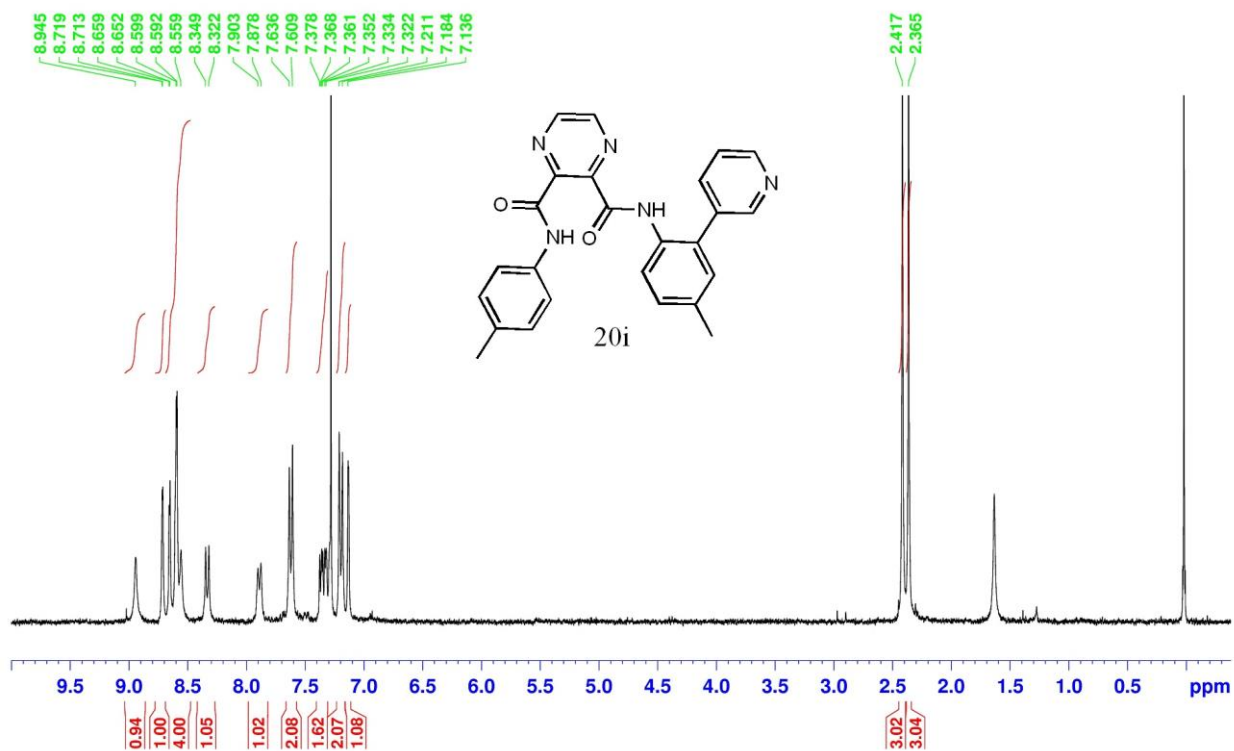

# <sup>13</sup>C NMR (75 MHz, CDCl<sub>3</sub>)

MS-V-24 C13 in CDCl<sub>3</sub>  
08/07/2012

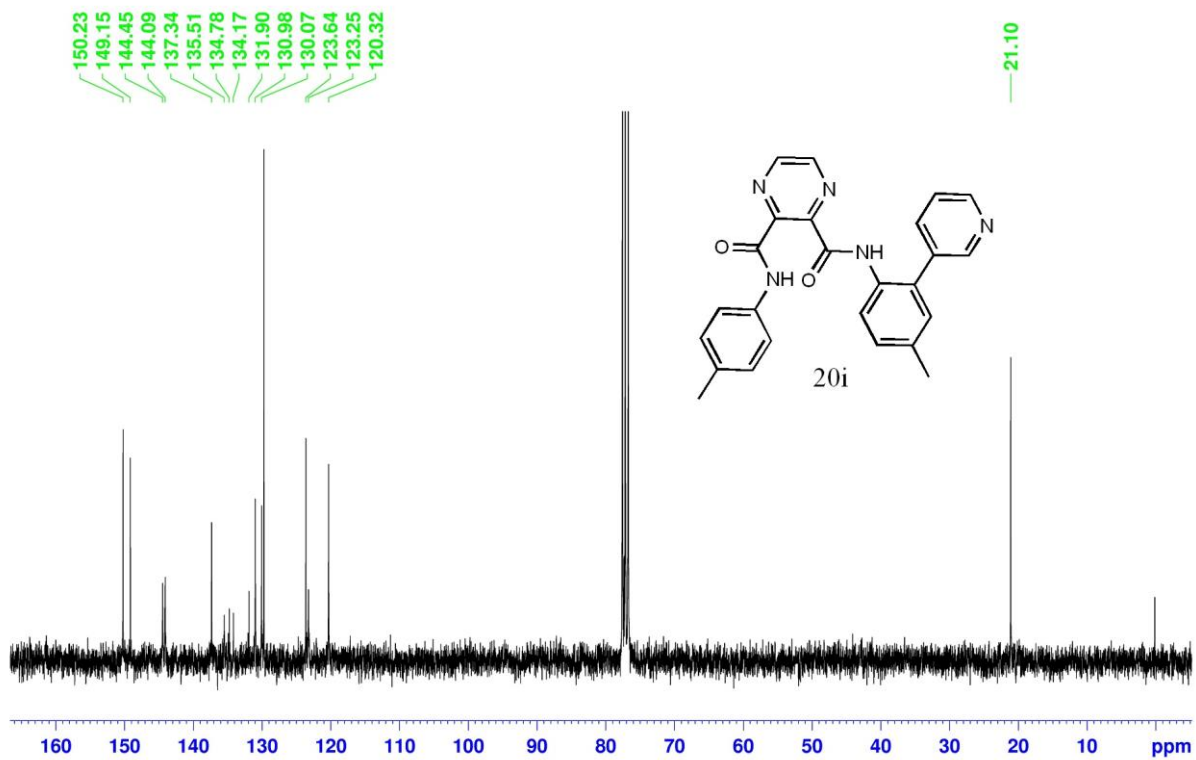

*N*<sup>2</sup>-(4-(pyridin-3-yl) benzyl)-*N*<sup>3</sup>-(p-tolyl) pyrazine-2,3-dicarboxamide (20j)

HRMS (ES+)

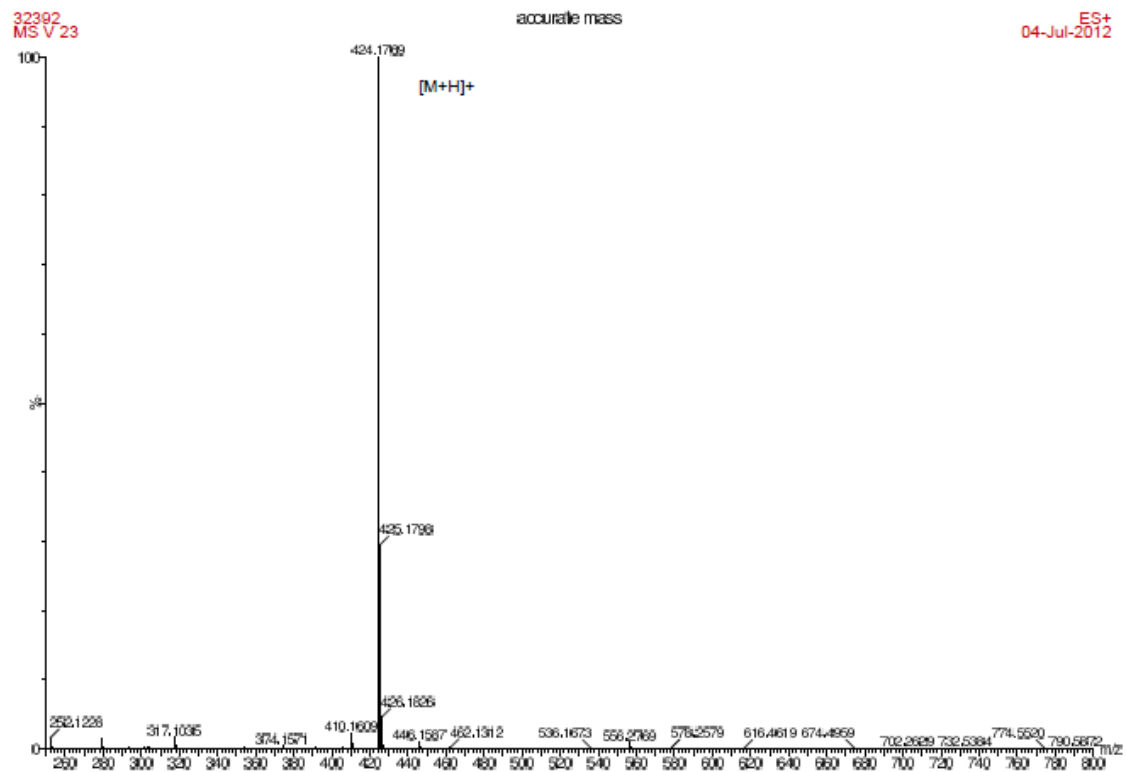

<sup>1</sup>H NMR (300 MHz, CDCl<sub>3</sub>)

MS-V-23 in CDCl<sub>3</sub>  
04/07/2012

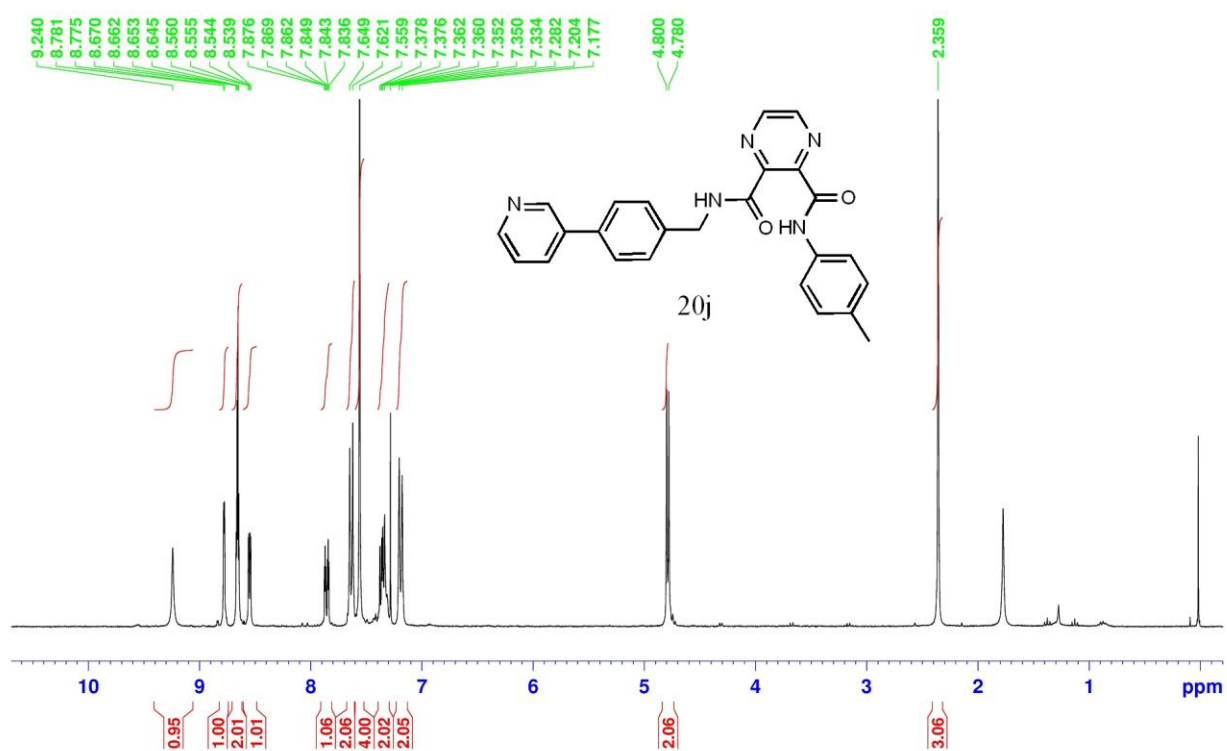

$^{13}\text{C}$  NMR (75 MHz,  $\text{CDCl}_3$ )

MS-V-23 C13 in  $\text{CDCl}_3$   
05/07/2012

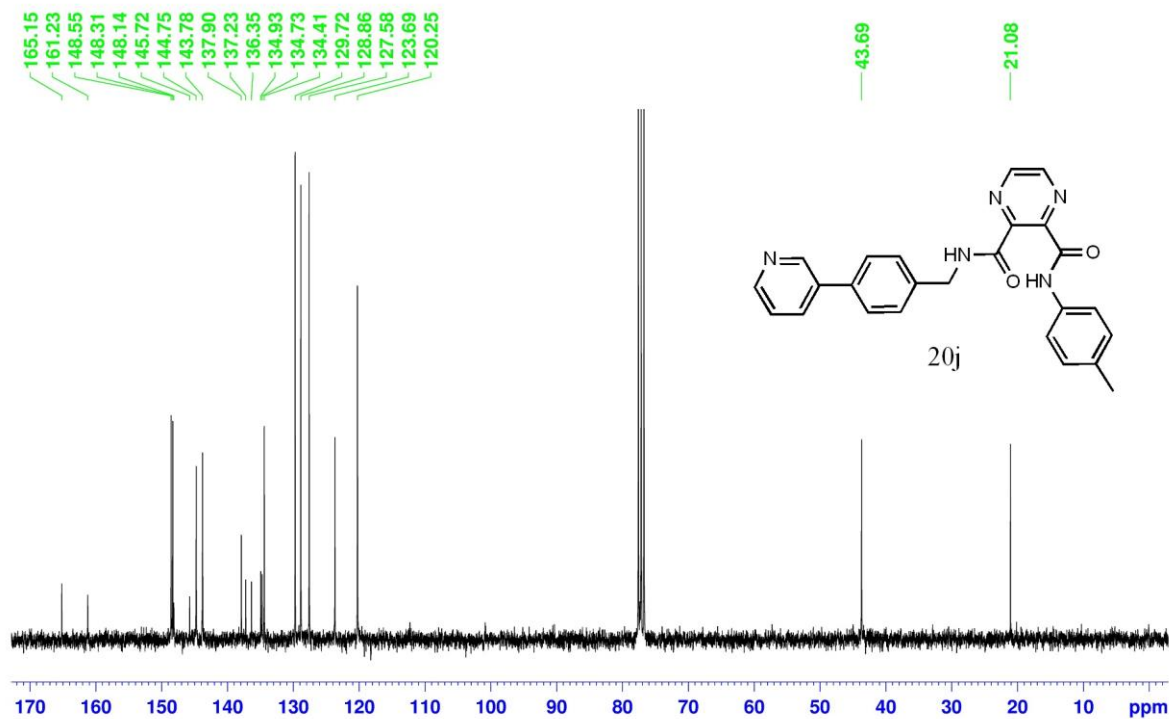

4.4.1.7.11  $N^2$ -(2-(pyridin-4-yl) phenyl)- $N^3$ -(p-tolyl) pyrazine-2,3-dicarboxamide (20k)

HRMS (ES+)

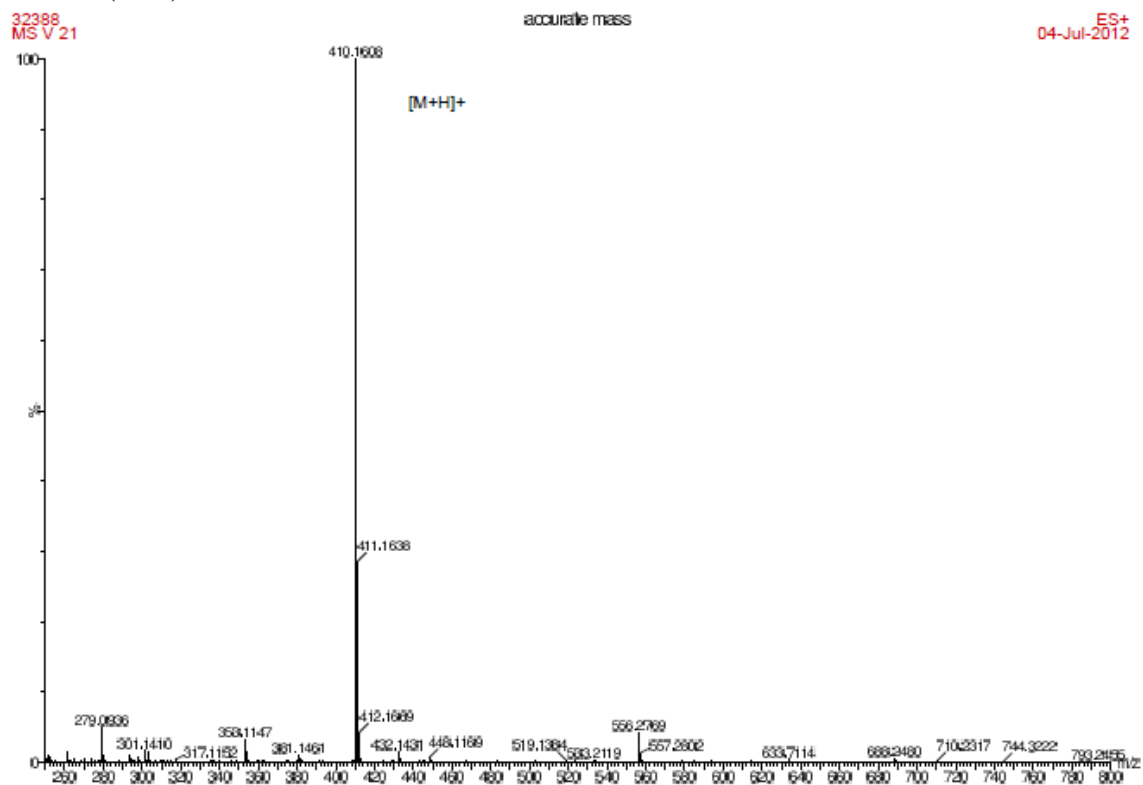

# <sup>1</sup>H NMR (300 MHz, CDCl<sub>3</sub>)

MS-V-21 in CDCl<sub>3</sub>  
06/07/2012

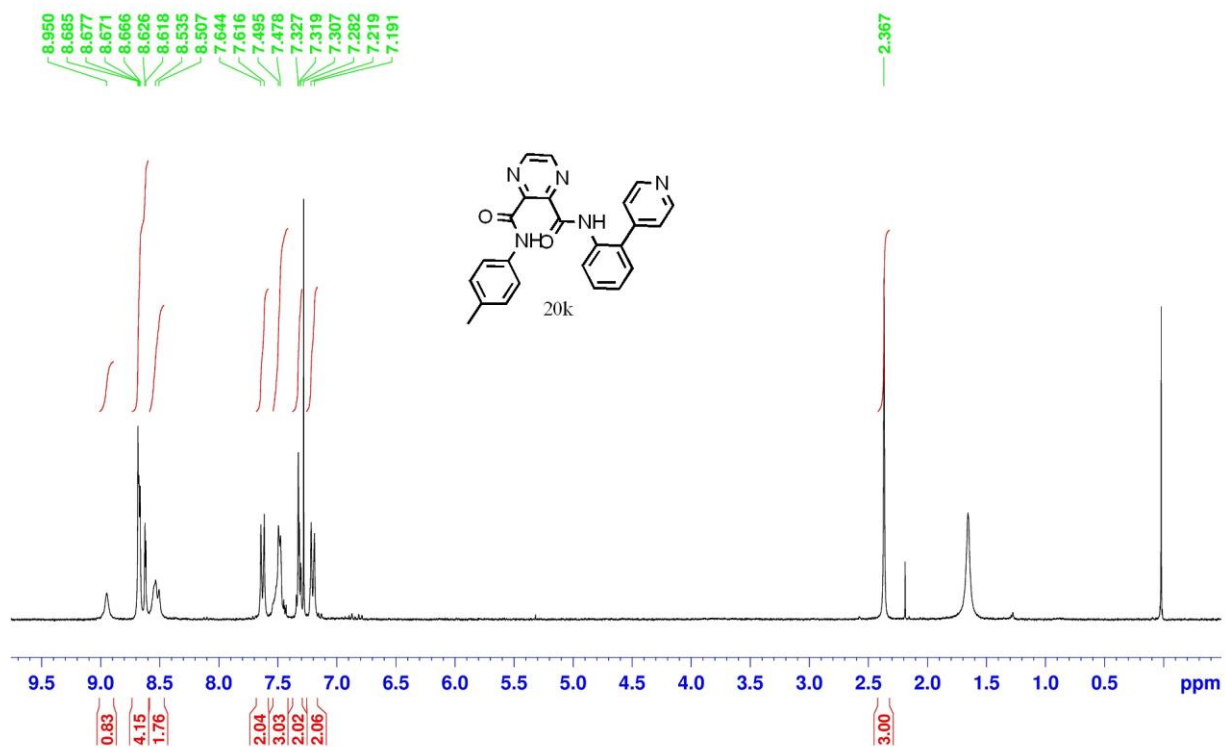

# <sup>13</sup>C NMR (75 MHz, CDCl<sub>3</sub>)

MS-V-21C13 in CDCl<sub>3</sub>  
09/07/2012

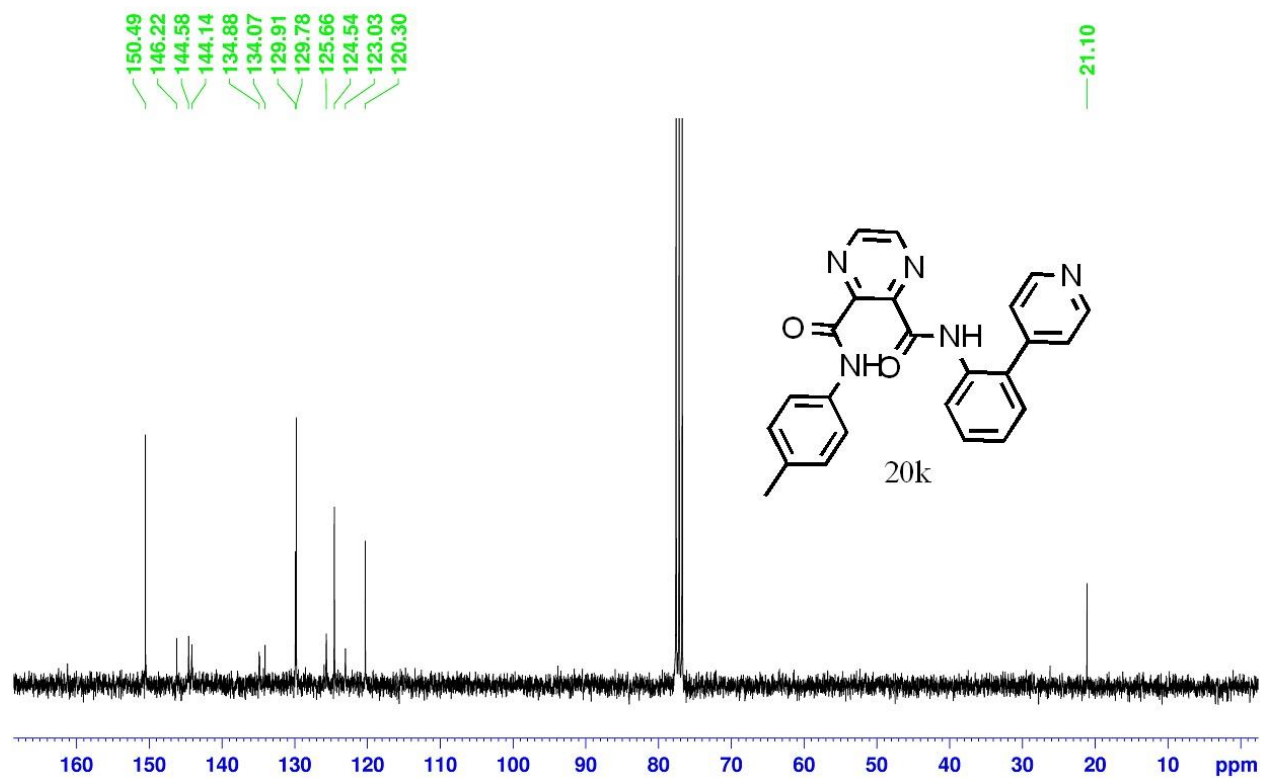



***N*<sup>2</sup>-(2-(pyridin-3-yl) phenyl)-*N*<sup>3</sup>-(*p*-tolyl) pyrazine-2,3-dicarboxamide (201)**

HRMS (ES+)

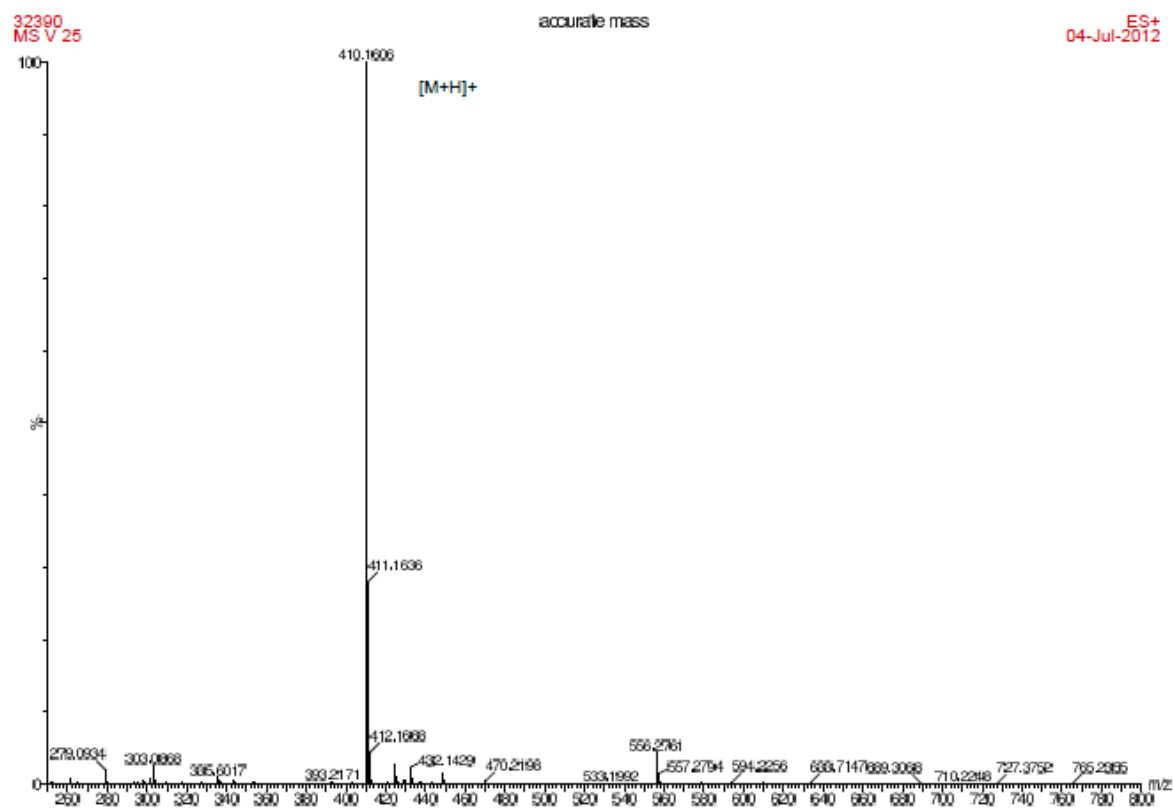

<sup>1</sup>H NMR (300 MHz, CDCl<sub>3</sub>)

MS-V-25 in CDCl<sub>3</sub>  
13/07/2012

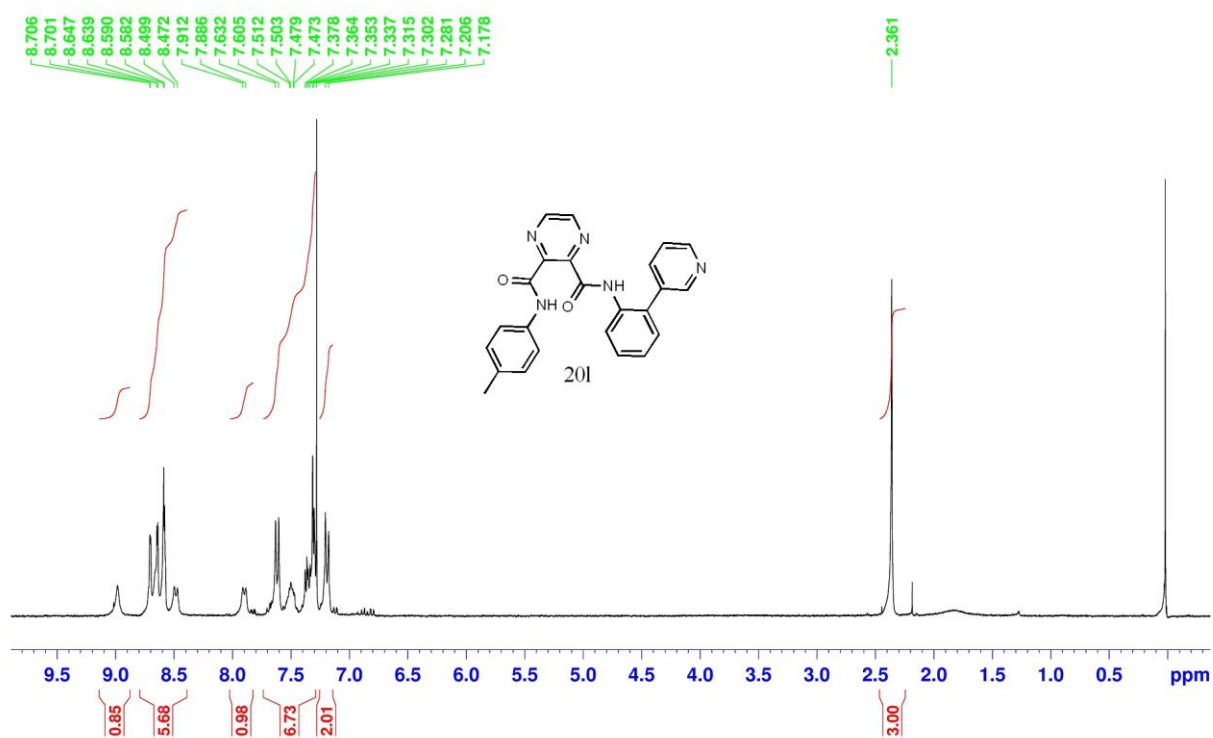

$^{13}\text{C}$  NMR (75 MHz,  $\text{CDCl}_3$ )

MS-V-25 C13 in  $\text{CDCl}_3$  300 MHz  
03/03/2014

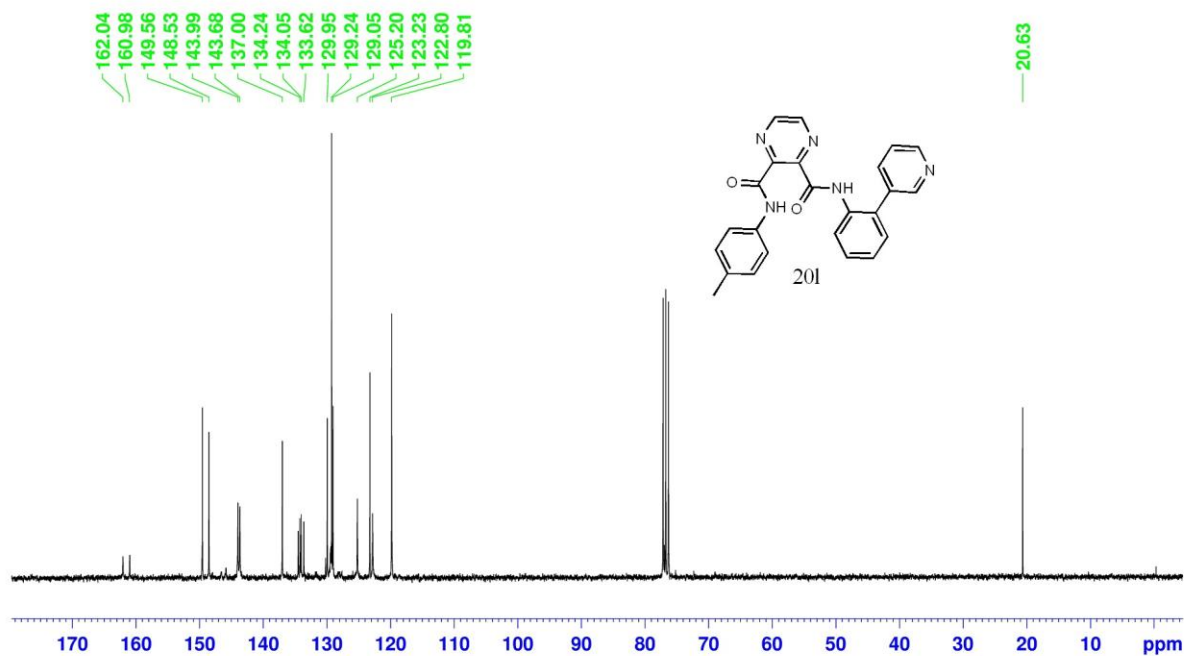

$N^2$ -(4-(pyridin-4-yl)benzyl)- $N^3$ -(p-tolyl)pyrazine-2,3-dicarboxamide (20m)

HRMS (ES+)

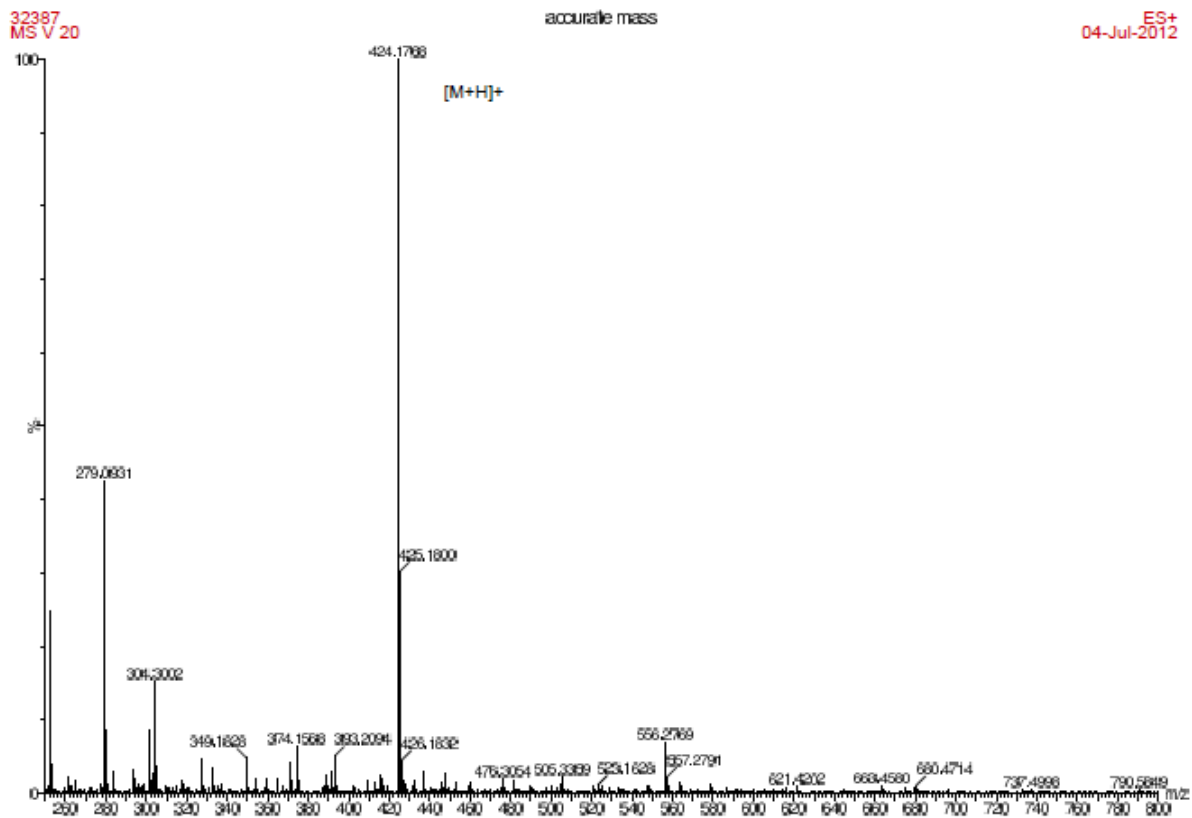

<sup>1</sup>H NMR (300 MHz, CDCl<sub>3</sub>)

MS-V-20 in CDCl<sub>3</sub>  
06/07/2012

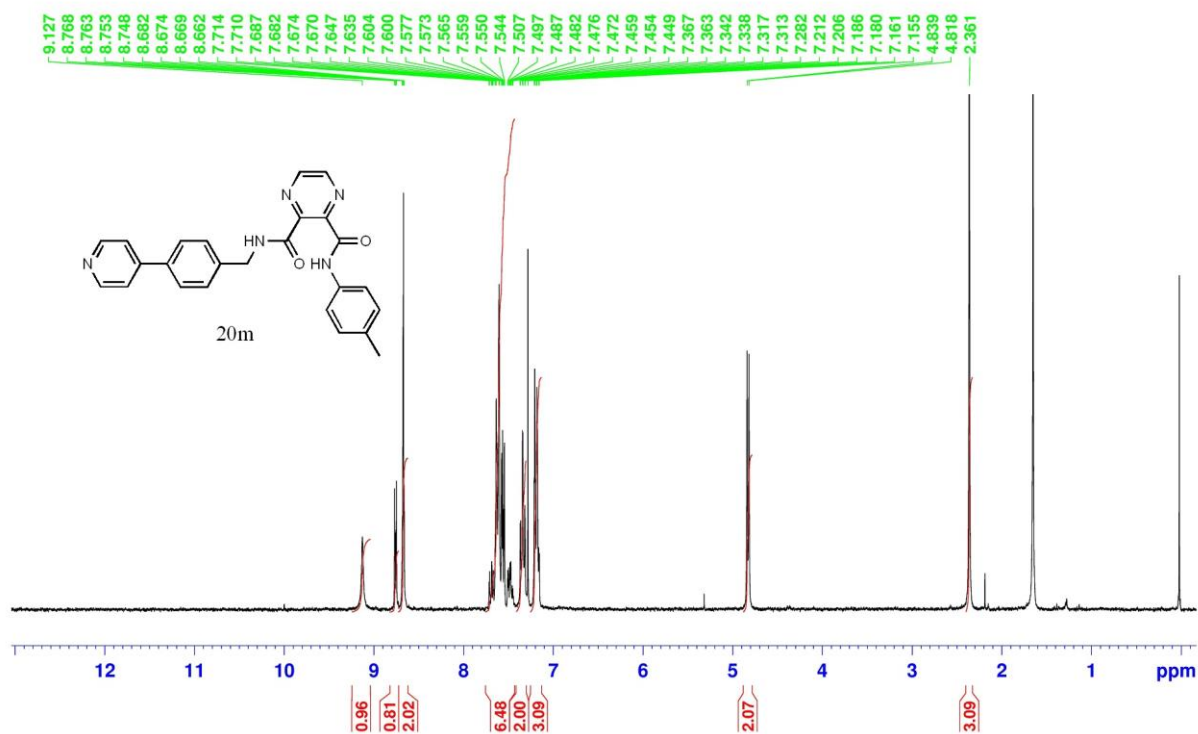

<sup>13</sup>C NMR (75 MHz, CDCl<sub>3</sub>)

MS-V-20 C13 in CDCl<sub>3</sub>  
06/07/2012

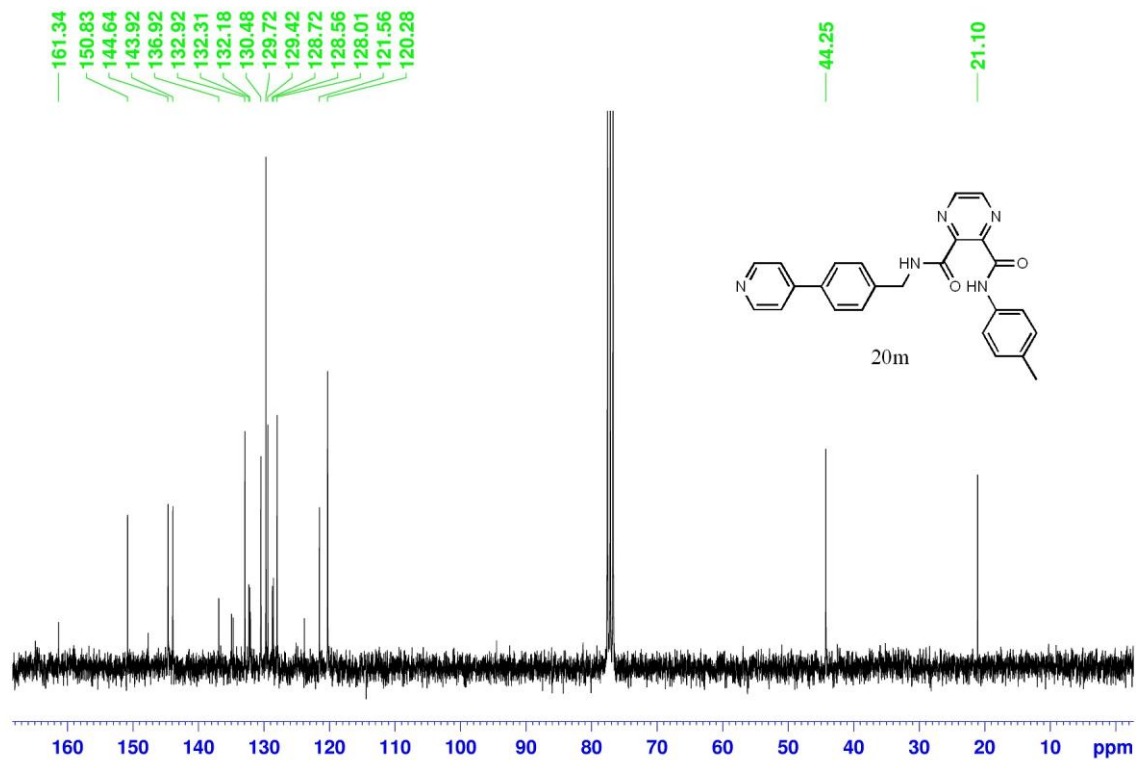

***N*<sup>2</sup>-(4-methyl-2-(pyridin-4-yl) phenyl)-*N*<sup>3</sup>-(*p*-tolyl) pyrazine-2,3-dicarboxamide (20n)**

HRMS (ES+)

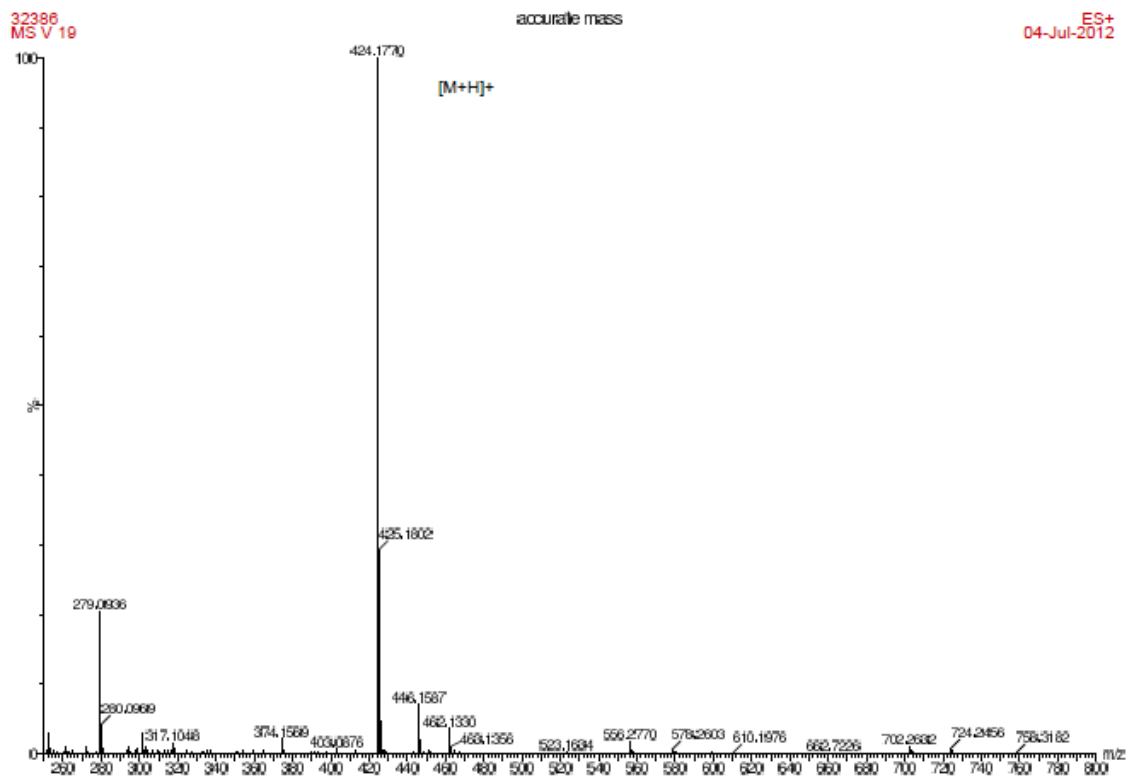

<sup>1</sup>H NMR (300 MHz, CDCl<sub>3</sub>)

MS-V-19 in CDCl<sub>3</sub>  
09/07/2012

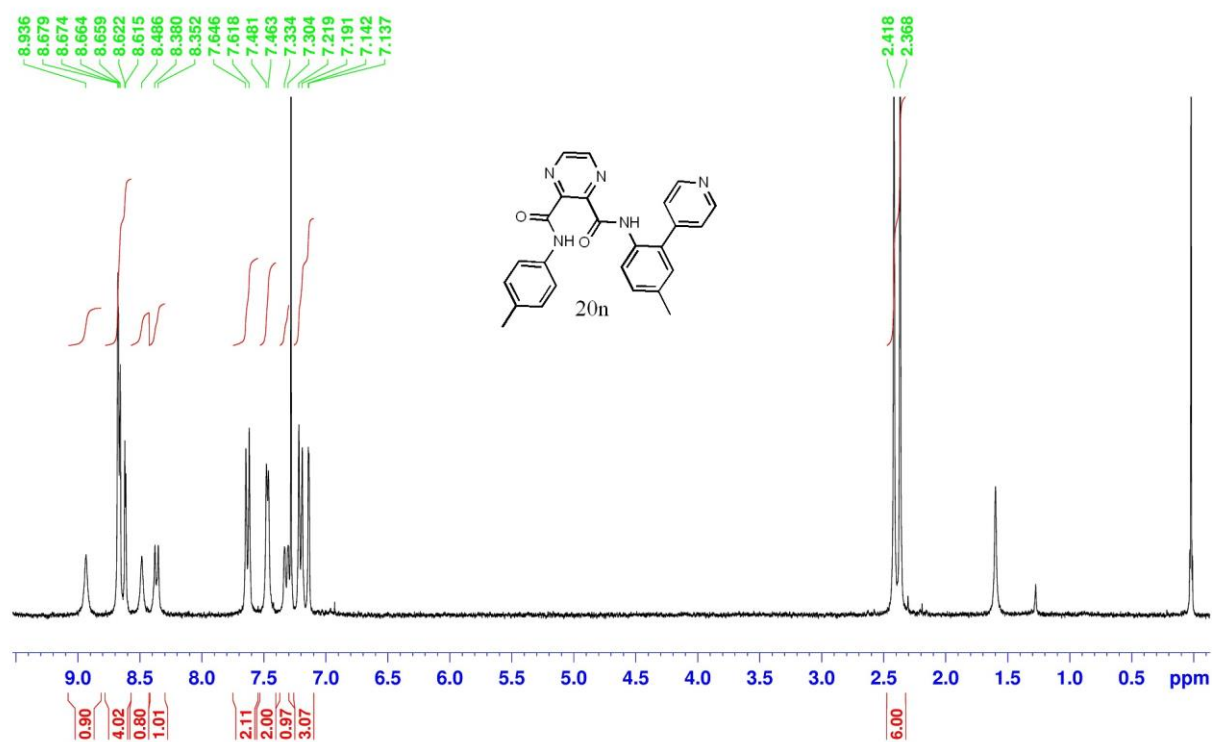

$^{13}\text{C}$  NMR (75 MHz,  $\text{CDCl}_3$ )

MS-V-19 C13 in  $\text{CDCl}_3$   
09/07/2012

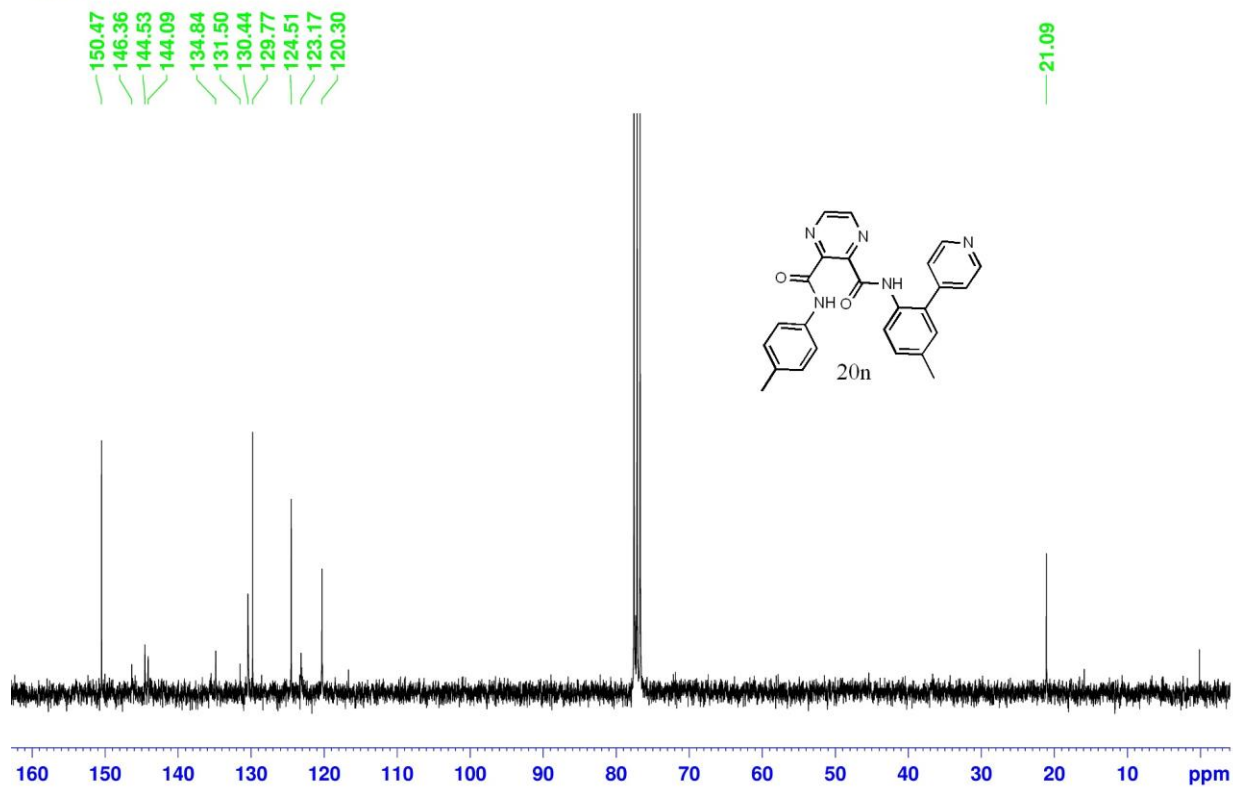

Supplement: mmc1.pdf [file mmc1.pdf]
